# Supplementary material
Source: Research Square preprint supplement (doi:10.21203/rs.3.rs-9376613/v1)
Supplement: Supplementary file 1 [file 04b0519c0acaa6065956eda8.xlsx]

## Sheet: TableS2_rMAG_information
Table S2. Taxonomic classification and genome quality of the rMAGs.
rMAG	Completeness	Contamination	Category	Quality
323_bin.2_s__Dermabacter_vaginalis	75.31	1.9	Normal	medium
511_bin.48_s__Centipeda_noxia	75.64	3.17	Normal	medium
817_bin.60_g__Pauljensenia	76	3.88	Novel	medium
406_bin.17_g__Lachnoanaerobaculum	76.4	1.48	Novel	medium
608_bin.13_s__Lautropia_mirabilis	76.59	4.63	Normal	medium
706_bin.2_g__Moraxella_A	76.64	9.45	Novel	medium
817_bin.52_f__Weeksellaceae	76.69	1.47	Novel	medium
427_bin.9_g__Neisseria	76.72	5.87	Novel	medium
706_bin.28_s__JAHHHE01_sp019359535	76.8	1.78	Normal	medium
706_bin.30_s__Micrococcus_luteus	76.85	3.33	BSL-1	medium
817_bin.57_g__Neisseria	77.17	7	Novel	medium
525_bin.2_s__Sphingomonas_sp003951315	77.22	2.91	Normal	medium
511_bin.64_s__Arachnia_rubra	77.26	4.28	Normal	medium
511_bin.6_s__Staphylococcus_epidermidis	77.46	4.65	BSL-2	medium
427_bin.28_s__Roseomonas_mucosa	77.75	1	Normal	medium
817_bin.35_g__Anaerococcus	78.66	0.61	Novel	medium
406_bin.23_g__Pauljensenia	78.69	4	Novel	medium
511_bin.44_s__Peptidiphaga_sp000466165	78.89	0.28	Normal	medium
330_bin.4_f__Acetobacteraceae	79.07	3.17	Novel	medium
406_bin.3_g__Pseudomonas_E	79.1	2.3	Novel	medium
817_bin.62_s__Dermacoccus_nishinomiyaensis	79.9	2.12	Normal	medium
323_bin.6_f__Sphingomonadaceae	80.06	4.96	Novel	medium
817_bin.64_s__Micrococcus_luteus	80.08	4.56	BSL-1	medium
608_bin.32_s__Micrococcus_luteus	80.21	2.74	BSL-1	medium
608_bin.14_s__Corynebacterium_bouchesdurhonense	80.23	3.61	Normal	medium
323_bin.58_s__Marihabitans_melonis	80.27	1.62	Normal	medium
511_bin.27_s__Cutibacterium_granulosum	80.38	3.84	Normal	medium
330_bin.6_s__QFOX01_sp003241645	80.49	2.81	Normal	medium
330_bin.13_s__Scardovia_wiggsiae	80.55	2.95	Normal	medium
608_bin.17_s__Cutibacterium_granulosum	80.76	4.61	Normal	medium
511_bin.62_g__Granulicatella	80.79	1.64	Novel	medium
608_bin.33_g__Rothia	80.94	5.09	Novel	medium
323_bin.32_f__Coleofasciculaceae	80.98	1.7	Novel	medium
608_bin.38_g__Corynebacterium	81.31	2.17	Novel	medium
427_bin.18_g__Rothia	81.67	1.56	Novel	medium
525_bin.26_s__Cutibacterium_granulosum	81.69	4.71	Normal	medium
323_bin.23_f__Rubrobacteraceae	82.59	3.95	Novel	medium
406_bin.39_s__Porphyromonas_endodontalis	82.72	3.36	Normal	medium
817_bin.13_s__Kocuria_rhizophila	83.28	0.66	Normal	medium
511_bin.8_s__Prevotella_salivae	83.32	1.33	BSL-2	medium
323_bin.41_s__Cutibacterium_granulosum	83.33	0.99	Normal	medium
427_bin.4_g__Pseudomonas_E	83.86	3.03	Novel	medium
608_bin.34_s__Cutibacterium_avidum	83.88	1.97	Normal	medium
817_bin.70_g__Stutzerimonas	84.21	7.38	Novel	medium
330_bin.17_s__Diaphorobacter_nitroreducens	84.54	5.51	Normal	medium
817_bin.19_s__Corynebacterium_jeddahense	84.61	1.94	Normal	medium
706_bin.8_f__Acetobacteraceae	84.67	1	Novel	medium
323_bin.12_g__Cloacibacterium	85.07	1.86	Novel	medium
406_bin.20_g__Leptotrichia_A	85.26	4.31	Novel	medium
406_bin.9_g__Gemella	85.44	4.5	Novel	medium
323_bin.26_s__Micrococcus_luteus	85.5	1.83	BSL-1	medium
511_bin.53_s__Bergeyella_A_cardium	85.64	1.71	Normal	medium
817_bin.65_s__Cutibacterium_granulosum	85.67	1.05	Normal	medium
511_bin.56_s__Micrococcus_luteus	85.82	3.06	BSL-1	medium
427_bin.11_s__Cutibacterium_granulosum	85.86	4.39	Normal	medium
406_bin.31_s__Neisseria_elongata	85.98	5.65	Normal	medium
706_bin.15_s__Dermacoccus_abyssi	86.15	3.72	Normal	medium
413_bin.9_s__Cutibacterium_granulosum	86.59	3.26	Normal	medium
406_bin.5_g__Veillonella	86.77	3.49	Novel	medium
406_bin.27_g__Actinomyces	86.89	3.12	Novel	medium
817_bin.30_g__Prevotella	87.44	2.43	Novel	medium
608_bin.4_g__Paenibacillus	87.48	2.11	Novel	medium
817_bin.11_g__Capnocytophaga	87.81	5.52	Novel	medium
323_bin.16_s__UBA3913_sp002391425	87.9	0.87	Normal	medium
817_bin.6_g__Veillonella	87.99	5.91	Novel	medium
706_bin.14_s__Corynebacterium_sp943912665	88.08	2.29	Normal	medium
323_bin.40_f__Isosphaeraceae	88.11	2.33	Novel	medium
323_bin.20_s__Janibacter_A_massiliensis	88.39	1.4	Normal	medium
323_bin.34_f__Acetobacteraceae	88.54	1.19	Novel	medium
427_bin.20_o__Burkholderiales	88.58	1.72	Novel	medium
511_bin.15_s__Kocuria_rhizophila	88.82	3.32	Normal	medium
511_bin.50_s__Paracoccus_contaminans	88.92	3.63	Normal	medium
330_bin.19_o__Cyanobacteriales	89.13	5.22	Novel	medium
511_bin.12_s__Capnocytophaga_leadbetteri	89.13	2.54	Normal	medium
608_bin.11_s__Kocuria_palustris	89.17	2.41	Normal	medium
525_bin.33_s__Micrococcus_luteus	89.32	1.89	BSL-1	medium
608_bin.28_g__Gemella	89.41	6.92	Novel	medium
525_bin.34_g__Corynebacterium	89.43	2.95	Novel	medium
323_bin.11_g__Deinococcus	89.64	2.93	Novel	medium
323_bin.60_g__Veillonella	89.8	1.75	Novel	medium
427_bin.17_g__Deinococcus	89.8	6.23	Novel	medium
406_bin.12_g__Actinomyces	89.81	1.94	Novel	medium
706_bin.29_g__Micropruina	89.83	1.04	Novel	medium
511_bin.52_s__Lautropia_mirabilis	90	3.09	Normal	medium
608_bin.12_g__Amaricoccus	90.09	2.21	Novel	high
511_bin.61_s__Prevotella_sp013333285	90.1	2.76	Normal	high
511_bin.36_g__Campylobacter_A	90.19	4.62	Novel	high
706_bin.3_s__Dermabacter_vaginalis	90.19	2.24	Normal	high
706_bin.27_s__Cutibacterium_granulosum	90.24	2.96	Normal	high
406_bin.8_s__Gemella_sanguinis	90.4	1.84	Normal	high
323_bin.50_s__QFNR01_sp003248485	90.42	0.43	Normal	high
406_bin.24_g__Fusobacterium	90.56	2.25	Novel	high
511_bin.54_g__Aggregatibacter	91	1.7	Novel	high
323_bin.18_s__Rothia_aeria	91.06	0.11	Normal	high
817_bin.38_s__Anaerococcus_octavius	91.07	0.91	Normal	high
330_bin.14_g__Stenotrophomonas	91.19	0.63	Novel	high
413_bin.11_s__Microbacterium_lacticum	91.21	2.45	Normal	high
406_bin.4_g__Granulicatella	91.41	6.32	Novel	medium
608_bin.1_g__Veillonella	91.48	4.14	Novel	high
323_bin.10_s__Kocuria_rosea	91.49	2.37	Normal	high
608_bin.22_g__Anaerococcus	91.5	1.52	Novel	high
525_bin.36_g__Streptococcus	91.53	9.22	Novel	medium
817_bin.50_s__Acinetobacter_junii	91.67	1.07	BSL-2	high
525_bin.4_s__Paracoccus_contaminans	91.8	2.75	Normal	high
427_bin.6_g__Microcoleus	91.82	1.39	Novel	high
413_bin.16_g__Moraxella_A	92.39	1.8	Novel	high
817_bin.46_g__Anoxybacillus	92.59	1.25	Novel	high
817_bin.3_s__Cardiobacterium_hominis	92.72	3.69	Normal	high
706_bin.9_g__Staphylococcus	92.92	5.29	Novel	medium
330_bin.7_g__Acinetobacter	92.94	0.68	Novel	high
330_bin.9_g__Ochrobactrum	92.94	4.51	Novel	high
608_bin.27_s__Dermabacter_hominis	92.98	1.46	Normal	high
330_bin.11_s__Staphylococcus_hominis	93.02	2.07	BSL-2	high
427_bin.3_s__Xanthomonas_campestris	93.12	0.72	Normal	high
817_bin.67_g__Anaerococcus	93.22	1.83	Novel	high
427_bin.30_s__Comamonas_denitrificans_A	93.24	1.15	Normal	high
323_bin.19_s__Kocuria_palustris	93.44	0.88	Normal	high
323_bin.8_g__Finegoldia	93.6	1.42	Novel	high
323_bin.7_s__Hydrogenophilus_thermoluteolus	93.62	1.33	Normal	high
511_bin.66_g__Alloprevotella	93.63	0	Novel	high
608_bin.23_s__Anaerococcus_nagyae	93.75	0.81	Normal	high
817_bin.24_g__Pseudomonas_E	93.89	2.42	Novel	high
511_bin.31_s__Peptostreptococcus_sp900759325	94.11	1.4	Normal	high
330_bin.22_s__Corynebacterium_striatum	94.31	1.63	BSL-2	high
316_bin.1_g__Promicromonospora	94.41	2.89	Novel	high
817_bin.55_g__Anaerococcus	94.45	0.61	Novel	high
511_bin.32_s__Micrococcus_sp023147585	94.49	2.76	Normal	high
706_bin.7_g__Gemella	94.54	0	Novel	high
817_bin.58_s__Paracoccus_contaminans	94.59	2.2	Normal	high
406_bin.30_s__Prevotella_nanceiensis	94.76	1.07	BSL-2	high
525_bin.1_s__Kocuria_palustris	94.96	3.16	Normal	high
706_bin.18_s__Lawsonella_clevelandensis_A	95	0	Normal	high
608_bin.26_s__Paracoccus_yeei	95.01	1.49	Normal	high
511_bin.65_s__Mesocricetibacter_sp905373425	95.11	3.41	Normal	high
323_bin.38_s__Pauljensenia_radingae_A	95.24	0.95	Normal	high
817_bin.27_g__Streptococcus	96.07	7.08	Novel	medium
817_bin.33_g__Granulicatella	96.21	2.37	Novel	high
706_bin.17_g__CADCTG01	96.39	1.83	Novel	high
511_bin.3_s__Peptoniphilus_A_gorbachii	96.62	0.2	Normal	high
413_bin.3_s__Kocuria_rosea	96.66	0.52	Normal	high
511_bin.14_g__Capnocytophaga	96.67	0.71	Novel	high
323_bin.57_o__Coriobacteriales	96.77	2.42	Novel	high
817_bin.2_g__Porphyromonas_A	96.95	0.31	Novel	high
413_bin.18_g__Kaistella	97.06	1.35	Novel	high
817_bin.45_s__Lautropia_mirabilis	97.12	2.16	Normal	high
511_bin.33_s__Staphylococcus_capitis	97.13	5.23	Normal	medium
525_bin.20_g__Neisseria	97.21	2.27	Novel	high
525_bin.10_s__Corynebacterium_glucuronolyticum	97.22	0.35	Normal	high
817_bin.63_g__Negativicoccus	97.22	0.63	Novel	high
608_bin.5_s__Porphyromonas_sp003640335	97.41	0.94	Normal	high
406_bin.41_s__Alloprevotella_sp015257125	97.51	0	Normal	high
525_bin.11_s__Rubellimicrobium_rubrum	97.53	2.38	Normal	high
706_bin.23_o__Burkholderiales	97.53	1.44	Novel	high
427_bin.19_s__Cutibacterium_acnes	97.55	1.71	Normal	high
706_bin.10_s__Paracoccus_marinus	97.7	2	Normal	high
511_bin.55_s__Peptidiphaga_gingivicola	97.78	0.83	Normal	high
706_bin.19_s__Corynebacterium_gottingense	97.87	3.72	Normal	high
330_bin.15_g__Pseudomonas	97.9	1.88	Novel	high
511_bin.40_s__Prevotella_pallens	97.94	0	BSL-2	high
406_bin.15_s__Staphylococcus_epidermidis	97.97	0.7	BSL-2	high
525_bin.15_g__Rothia	98	1	Novel	high
608_bin.6_s__Peptoniphilus_A_lacydonensis	98.02	0	Normal	high
525_bin.12_g__Anaerococcus	98.04	1.83	Novel	high
817_bin.23_s__Rothia_dentocariosa	98.07	2.98	BSL-2	high
413_bin.1_s__JAKRSD01_sp022402535	98.12	2.16	Normal	high
525_bin.25_f__Propionibacteriaceae	98.19	2.49	Novel	high
817_bin.21_s__Porphyromonas_pasteri	98.3	0	Normal	high
406_bin.2_g__Prevotella	98.31	1.69	Novel	high
511_bin.17_s__Prevotella_shahii	98.34	2.37	Normal	high
511_bin.29_g__Abiotrophia	98.46	0.27	Novel	high
323_bin.30_f__Chroococcidiopsidaceae	98.67	2.41	Novel	high
316_bin.6_g__Pseudomonas_E	98.99	0.71	Novel	high
323_bin.45_s__Actinomyces_sp000220835	99.05	1.08	Normal	high
323_bin.39_s__Parageobacillus_toebii	99.09	1.74	Normal	high
323_bin.22_g__Exiguobacterium	99.34	0	Novel	high
817_bin.16_g__Anaerococcus	99.39	4.31	Novel	high
511_bin.11_s__Anaeroglobus_micronuciformis	99.4	0.32	Normal	high
817_bin.22_s__Janibacter_indicus	99.71	1.08	Normal	high
427_bin.29_s__JAHHHE01_sp019359535	99.78	1.19	Normal	high
511_bin.30_s__Corynebacterium_durum	100	0.5	Normal	high
