# Supplementary material
Source: Research Square preprint supplement (doi:10.21203/rs.3.rs-9376613/v1)
Supplement: Supplementary file 2 [file 1a4dbef57a3086990a526aab.xlsx]

## Sheet: TableS4_GRid_value
TableS4. Growth Rate Index (GRiD) values of rMAGs over time.
rMAG	230316	230323	230330	230406	230413	230427	230511	230525	230608	230706	230817	Average
323_bin.26_s__Micrococcus_luteus	0	1.67857	2.11	1.90625	2.02	2.19583	2.37417	1.597	1.90429	1.839	2.11833	1.79486
511_bin.56_s__Micrococcus_luteus	1.95	1.83714	2.39	2.16625	2.22	2.155	2.5225	1.637	2	2.18667	2.29083	2.12322
608_bin.32_s__Micrococcus_luteus	1.855	1.88714	2.315	2.19375	2.275	2.2075	2.0425	1.698	2.008	1.84375	2.30417	2.05726
706_bin.30_s__Micrococcus_luteus	1.92	1.855	2.265	2.1	2.25	2.1675	1.995	1.661	2.022	1.81625	2.37833	2.0391
817_bin.64_s__Micrococcus_luteus	2.0525	1.93	2.485	2.095	2.485	2.29875	1.7	1.732	1.8675	1.97875	2.32571	2.08638
817_bin.23_s__Rothia_dentocariosa	0	2.0875	2.82	0	2.21	1.975	2.32857	2.29375	2.34	2.14417	1.53286	1.7938
406_bin.2_g__Prevotella	0	2.625	1.575	1.64	0	1.31	1.38357	1.47667	1.445	1	1.5275	1.27116
406_bin.30_s__Prevotella_nanceiensis	0	0	0	1.785	0	1.69	1.83333	0	1.65	0	0	0.632576
511_bin.40_s__Prevotella_pallens	0	0	0	1.375	0	1.615	1.575	2.045	1.455	0	1.865	0.902727
511_bin.8_s__Prevotella_salivae	0	0	0	2.84	0	0	2.00333	0	0	0	0	0.440303
330_bin.22_s__Corynebacterium_striatum	1.48	0	2.06167	0	1.94	0	1.65	2.95	0	0	0	0.916515
525_bin.10_s__Corynebacterium_glucuronolyticum	1.37	1.38071	1.28286	1.25571	1.3725	1.30667	1.22	1.241	1.26833	1.21714	1.20571	1.28369
817_bin.54_s__Corynebacterium_glucuronolyticum	1.34625	1.40857	1.445	1.29	1.45625	1.295	1.23083	1.281	1.25417	1.22714	1.23286	1.31519
406_bin.8_s__Gemella_sanguinis	0	2.96	0	1.555	0	0	1.7575	0	2.745	0	2.935	1.08659
511_bin.65_s__Mesocricetibacter_sp905373425	0	0	0	1.155	0	1.96	1.46083	2.13	1.68	0	1.74667	0.921136
406_bin.31_s__Neisseria_elongata	0	2.14167	0	0	1.43	2.635	1.79429	2.655	0	0	2.02786	1.15307
525_bin.20_g__Neisseria	1.85	2.05833	2.25	0	0	2.42	1.64857	1.94429	2.03286	2.14857	1.39857	1.61374
706_bin.5_s__Peptoniphilus_A_lacydonensis	0	2.535	0	0	2.9025	1.69	0	2.13	2.1375	1.81667	0	1.20106
817_bin.2_g__Porphyromonas_A	0	1.31	0	1.342	0	1.41	1.184	1.2	0	1.314	1.19714	0.814286
330_bin.15_g__Pseudomonas	1.67	0	1.6	0	0	0	0	1.86333	2.115	0	1.79286	0.821926
316_bin.6_g__Pseudomonas_E	1.495	0	0	0	0	0	0	0	0	0	0	0.135909
406_bin.3_g__Pseudomonas_E	0	0	0	1.47	0	0	0	0	0	0	0	0.133636
427_bin.4_g__Pseudomonas_E	0	0	2.8	0	0	1.87	0	0	0	0	2.415	0.644091
817_bin.24_g__Pseudomonas_E	0	0	1.905	0	0	1.50833	0	0	0	0	1.42143	0.439524
330_bin.14_g__Stenotrophomonas	0	7.65	1.28	8.1	1.795	5.56	0	0	4.8475	3.15	3.027	3.21905
330_bin.7_g__Acinetobacter	0	1.14	1.11	0	0	0	0	0	0	0	0	0.204545
817_bin.50_s__Acinetobacter_junii	0	0	0	0	0	0	0	0	0	0	2.0325	0.184773
330_bin.11_s__Staphylococcus_hominis	1.445	1.82429	1.90375	1.905	1.79667	1.683	1.50583	1.451	1.71167	1.788	1.89833	1.71932
406_bin.15_s__Staphylococcus_epidermidis	1.34	1.315	1.35643	1.435	1.44417	1.37833	1.34583	1.32857	1.38	1.35714	1.41214	1.37206
413_bin.7_s__Staphylococcus_epidermidis	1.58	1.42357	1.615	1.665	1.73286	1.59083	1.45833	1.45333	1.515	1.45929	1.49286	1.54419
511_bin.33_s__Staphylococcus_capitis	1.52071	1.31714	1.61	1.46083	1.574	1.305	1.29583	1.285	1.42	1.315	1.355	1.40532
511_bin.6_s__Staphylococcus_epidermidis	1.83	1.49	2.043	1.905	1.62167	1.537	1.525	1.53917	1.66667	1.55786	1.45214	1.65159
