# Supplementary material
Source: Research Square preprint supplement (doi:10.21203/rs.3.rs-9376613/v1)
Supplement: Supplementary file 3 [file 6c8e9a230a1e99423910cf9c.xlsx]

## Sheet: TableS1_Sloan_information
Table S1. Solan model-based inference of microbial transmission from nurses’ hands to hospital surfaces.
Species	Partition	Pathogen	BSL	ESKAPE
Abyssogena phaseoliformis symbiont	Neutral	Normal	None	No
Acaryochloris sp. CCMEE 5410	Neutral	Normal	None	No
Acetobacterium sp. KB-1	Neutral	Normal	None	No
Actinobacillus arthritidis	Neutral	Normal	None	No
Agarilytica rhodophyticola	Neutral	Normal	None	No
Anaerocolumna sp. AGMB13020	Neutral	Normal	None	No
Aquirufa antheringensis	Neutral	Normal	None	No
Bacillus pumilus	Neutral	Yes	BSL-1	No
Brevibacterium sp. S22	Neutral	Normal	None	No
Campylobacter sp. RM6914	Neutral	Normal	None	No
Candidatus Lucifugimonas marina	Neutral	Normal	None	No
Candidatus Sulfurimonas marisnigri	Neutral	Normal	None	No
Candidatus Wolbachia massiliensis	Neutral	Normal	None	No
Cepunavirus Cp1	Neutral	Normal	None	No
Chakrabartyella piscis	Neutral	Normal	None	No
Chitinophaga caeni	Neutral	Normal	None	No
Citrobacter tructae	Neutral	Normal	None	No
Colossusvirus PW	Neutral	Normal	None	No
Croceibacter atlanticus	Neutral	Normal	None	No
Desulfosediminicola flagellatus	Neutral	Normal	None	No
Diabrotica virgifera virgifera virus 3	Neutral	Normal	None	No
Echinicola vietnamensis	Neutral	Normal	None	No
Enterococcus sp. 9D6_DIV0238	Neutral	Normal	None	No
Entomospira culicis	Neutral	Normal	None	No
Fictibacillus enclensis	Neutral	Normal	None	No
Flagellimonas sp. HMM57	Neutral	Normal	None	No
Flavobacterium sp. N1994	Neutral	Normal	None	No
Formicincola oecophyllae	Neutral	Normal	None	No
Formosa agariphila	Neutral	Normal	None	No
Furfurilactobacillus rossiae	Neutral	Normal	None	No
Gammapapillomavirus 21	Neutral	Normal	None	No
Gilliamella sp. ESL0441	Neutral	Normal	None	No
Gottfriedia acidiceleris	Neutral	Normal	None	No
Gramella sp. MAR_2010_147	Neutral	Normal	None	No
Grimontia hollisae	Neutral	Normal	None	No
Halobacillus shinanisalinarum	Neutral	Normal	None	No
Hnatkovirus DS6A	Neutral	Normal	None	No
Kazachstania africana	Neutral	Normal	None	No
Kehishuvirus primarius	Neutral	Normal	None	No
Kochitakasuvirus R18	Neutral	Normal	None	No
Labilibaculum antarcticum	Neutral	Normal	None	No
Lactobacillus sp. ESL0785	Neutral	Normal	None	No
Macrococcus bovicus	Neutral	Normal	None	No
Malacoplasma penetrans	Neutral	Normal	None	No
Mesobacillus foraminis	Neutral	Normal	None	No
Mesomycoplasma flocculare	Neutral	Normal	None	No
Methanimicrococcus stummii	Neutral	Normal	None	No
Methanocella arvoryzae	Neutral	Normal	None	No
Methylomusa anaerophila	Neutral	Normal	None	No
Methyloradius palustris	Neutral	Normal	None	No
Moritella marina	Neutral	Normal	None	No
Mycoplasmopsis caviae	Neutral	Normal	None	No
Natrinema halophilum	Neutral	Normal	None	No
Nautilia sp. PV-1	Neutral	Normal	None	No
Neobacillus novalis	Neutral	Normal	None	No
Nitrosophilus labii	Neutral	Normal	None	No
Oceanusvirus kaneohense	Neutral	Normal	None	No
Paenibacillus algicola	Neutral	Normal	None	No
Paenibacillus barcinonensis	Neutral	Normal	None	No
Paenibacillus polygoni	Neutral	Normal	None	No
Paenibacillus sp. H1-7	Neutral	Normal	None	No
Paenisporosarcina cavernae	Neutral	Normal	None	No
Pandoravirus neocaledonia	Neutral	Normal	None	No
Paraneptunicella aestuarii	Neutral	Normal	None	No
Peribacillus sp. FSL E2-0218	Neutral	Normal	None	No
Phietavirus EW	Neutral	Normal	None	No
Photobacterium sp. TY1-4	Neutral	Normal	None	No
Pontibacter korlensis	Neutral	Normal	None	No
Poriferisphaera corsica	Neutral	Normal	None	No
Proteiniphilum saccharofermentans	Neutral	Normal	None	No
Providencia sneebia	Neutral	Normal	None	No
Pseudoalteromonas ostreae	Neutral	Normal	None	No
Pseudoalteromonas phenolica	Neutral	Normal	None	No
Psychrosphaera aestuarii	Neutral	Normal	None	No
Rosistilla carotiformis	Neutral	Normal	None	No
Ruminiclostridium cellulolyticum	Neutral	Normal	None	No
Salimicrobium jeotgali	Neutral	Normal	None	No
Salinimonas lutimaris	Neutral	Normal	None	No
Shewanella psychromarinicola	Neutral	Normal	None	No
Solibacillus sp. R5-41	Neutral	Normal	None	No
Soupsvirus soups	Neutral	Normal	None	No
Sporosarcina sp. T2O-4	Neutral	Normal	None	No
Staphylospora marina	Neutral	Normal	None	No
Streptomyces sp. NBC_00005	Neutral	Normal	None	No
Streptomyces sp. NBC_00637	Neutral	Normal	None	No
Theileria parva	Neutral	Normal	None	No
Thermocrinis minervae	Neutral	Normal	None	No
Thermosipho melanesiensis	Neutral	Normal	None	No
Thermovibrio ammonificans	Neutral	Normal	None	No
Varicellovirus equidalpha9	Neutral	Normal	None	No
Vibrio aestuarianus	Neutral	Normal	None	No
Vibrio mangrovi	Neutral	Normal	None	No
Vibrio quintilis	Neutral	Normal	None	No
Winogradskyella helgolandensis	Neutral	Normal	None	No
Wolbachia endosymbiont of Ctenocephalides felis wCfeJ	Neutral	Normal	None	No
Wolbachia endosymbiont of Folsomia candida	Neutral	Normal	None	No
Xiamenia xianingshaonis	Neutral	Normal	None	No
Zobellia alginiliquefaciens	Neutral	Normal	None	No
Zobellia laminariae	Neutral	Normal	None	No
Aggregatimonas sangjinii	Neutral	Normal	None	No
Aliamphritea ceti	Neutral	Normal	None	No
Aliarcobacter faecis	Neutral	Normal	None	No
Alicyclobacillus cycloheptanicus	Neutral	Normal	None	No
Alphabaculovirus eppostvittanae	Neutral	Normal	None	No
Aminomonas paucivorans	Neutral	Normal	None	No
Anseongella ginsenosidimutans	Neutral	Normal	None	No
Aquiflexum balticum	Neutral	Normal	None	No
Aquimarina sp. BL5	Neutral	Normal	None	No
Aureibaculum algae	Neutral	Normal	None	No
Borreliella spielmanii	Neutral	Normal	None	No
Butyrivibrio hungatei	Neutral	Normal	None	No
Caldithrix abyssi	Neutral	Normal	None	No
Calycomorphotria hydatis	Neutral	Normal	None	No
Campylobacter lanienae	Neutral	Normal	None	No
Candidatus Desulforudis audaxviator	Neutral	Normal	None	No
Candidatus Methylopumilus turicensis	Neutral	Normal	None	No
Candidatus Nasuia deltocephalinicola	Neutral	Normal	None	No
Candidatus Uabimicrobium amorphum	Neutral	Normal	None	No
Caproicibacterium argilliputei	Neutral	Normal	None	No
Cardinium endosymbiont of Philonthus spinipes	Neutral	Normal	None	No
Chitinibacter fontanus	Neutral	Normal	None	No
Chlorobaculum parvum	Neutral	Normal	None	No
Citrobacter sp. R56	Neutral	Normal	None	No
Clostridium sp. BNL1100	Neutral	Normal	None	No
Companilactobacillus allii	Neutral	Normal	None	No
Companilactobacillus crustorum	Neutral	Normal	None	No
Desulforamulus reducens	Neutral	Normal	None	No
Desulforapulum autotrophicum	Neutral	Normal	None	No
Duodenibacillus massiliensis	Neutral	Normal	None	No
Ectobacillus sp. JY-23	Neutral	Normal	None	No
Ectothiorhodosinus mongolicus	Neutral	Normal	None	No
Edwardsiella hoshinae	Neutral	Normal	None	No
Elusimicrobium minutum	Neutral	Normal	None	No
Erwinia sp. INIA01	Neutral	Normal	None	No
Flavobacterium indicum	Neutral	Normal	None	No
Flavobacterium pallidum	Neutral	Normal	None	No
Franconibacter daqui	Neutral	Normal	None	No
Glaciecola nitratireducens	Neutral	Normal	None	No
Granulosicoccus antarcticus	Neutral	Normal	None	No
Haloprofundus salilacus	Neutral	Normal	None	No
Helicobacter canadensis	Neutral	Yes	BSL-2	No
Helicobacter mustelae	Neutral	Normal	None	No
Idiomarina sp. OT37-5b	Neutral	Normal	None	No
Labilibaculum manganireducens	Neutral	Normal	None	No
Lactobacillus kefiranofaciens	Neutral	Normal	None	No
Lactobacillus sp. PV034	Neutral	Normal	None	No
Legionella adelaidensis	Neutral	Normal	None	No
Levilactobacillus koreensis	Neutral	Normal	None	No
Malaciobacter molluscorum	Neutral	Normal	None	No
Mariniblastus fucicola	Neutral	Normal	None	No
Mariniplasma anaerobium	Neutral	Normal	None	No
Methylomonas paludis	Neutral	Normal	None	No
Mixta intestinalis	Neutral	Normal	None	No
Mycoplasma struthionis	Neutral	Normal	None	No
Neobacillus cucumis	Neutral	Normal	None	No
Nitrosopumilus sp. K4	Neutral	Normal	None	No
Orrella daihaiensis	Neutral	Normal	None	No
Paenibacillus sp. FSL R7-0272	Neutral	Normal	None	No
Paenibacillus tritici	Neutral	Normal	None	No
Parabacteroides sp. AD58	Neutral	Normal	None	No
Peribacillus muralis	Neutral	Normal	None	No
Polaribacter gangjinensis	Neutral	Normal	None	No
Pragia fontium	Neutral	Normal	None	No
Providencia huaxiensis	Neutral	Normal	None	No
Pseudomonas phage PS-1	Neutral	Normal	None	No
Solibacillus daqui	Neutral	Normal	None	No
Sulfolobus tengchongensis	Neutral	Normal	None	No
Sulfurimonas lithotrophica	Neutral	Normal	None	No
Synechococcus sp. HK01-R	Neutral	Normal	None	No
Tepiditoga spiralis	Neutral	Normal	None	No
Tetragenococcus osmophilus	Neutral	Normal	None	No
Thalassotalea atypica	Neutral	Normal	None	No
Thermanaerovibrio acidaminovorans	Neutral	Normal	None	No
Thermocoleostomius sinensis	Neutral	Normal	None	No
Thermosulfurimonas marina	Neutral	Normal	None	No
Thiomicrospira cyclica	Neutral	Normal	None	No
Tidunavirus VP4B	Neutral	Normal	None	No
uncultured Methanoregula sp.	Neutral	Normal	None	No
Vibrio cincinnatiensis	Neutral	Normal	None	No
Vibrio gigantis	Neutral	Normal	None	No
Weeksella virosa	Neutral	Normal	None	No
Weissella phage WCP30	Neutral	Normal	None	No
Winogradskyella sp. MH6	Neutral	Normal	None	No
Woeseia oceani	Neutral	Normal	None	No
Yersinia hibernica	Neutral	Normal	None	No
Zophobihabitans entericus	Neutral	Normal	None	No
Acetobacterium woodii	Neutral	Normal	None	No
Actinoplanes hotanensis	Neutral	Normal	None	No
Aliarcobacter cibarius	Neutral	Normal	None	No
Allofrancisella frigidaquae	Neutral	Normal	None	No
Alphabaculovirus capomonae	Neutral	Normal	None	No
Anaerocolumna chitinilytica	Neutral	Normal	None	No
Anaerolinea thermophila	Neutral	Normal	None	No
Aquicella lusitana	Neutral	Normal	None	No
Aquimarina sp. AD10	Neutral	Normal	None	No
Aurodevirus hiberniae	Neutral	Normal	None	No
Blattabacterium sp. (Blaberus giganteus)	Neutral	Normal	None	No
Brachyspira murdochii	Neutral	Normal	None	No
Bremerella sp. P1	Neutral	Normal	None	No
Brucepastera parasyntrophica	Neutral	Normal	None	No
Campylobacter coli	Neutral	Yes	BSL-2	No
Candidatus Chromulinivorax destructor	Neutral	Normal	None	No
Candidatus Nitrosocosmicus franklandus	Neutral	Normal	None	No
Candidatus Pelagibacter sp. RS40	Neutral	Normal	None	No
Candidatus Planktophila vernalis	Neutral	Normal	None	No
Candidatus Ruthturnera calyptogenae	Neutral	Normal	None	No
Chlorobaculum tepidum	Neutral	Normal	None	No
Christiangramia forsetii	Neutral	Normal	None	No
Crassaminicella indica	Neutral	Normal	None	No
cyanobacterium endosymbiont of Epithemia turgida	Neutral	Normal	None	No
Desulfoscipio gibsoniae	Neutral	Normal	None	No
Desulfovibrio mangrovi	Neutral	Normal	None	No
Enterobacteriaceae endosymbiont of Plateumaris braccata	Neutral	Normal	None	No
Fervidibacillus albus	Neutral	Normal	None	No
Fervidobacterium nodosum	Neutral	Normal	None	No
Flavobacterium litorale	Neutral	Normal	None	No
Gimesia fumaroli	Neutral	Normal	None	No
Gordonia phage Reyja	Neutral	Normal	None	No
Helicobacter winghamensis	Neutral	Normal	None	No
Leadbettera azotonutricia	Neutral	Normal	None	No
Ligilactobacillus faecis	Neutral	Normal	None	No
Liquorilactobacillus hordei	Neutral	Normal	None	No
Listeria seeligeri	Neutral	Normal	None	No
Litorilituus sediminis	Neutral	Normal	None	No
Lyngbya confervoides	Neutral	Normal	None	No
Marinobacterium sp. LSUCC0821	Neutral	Normal	None	No
Marixanthomonas sp. SCSIO 43207	Neutral	Normal	None	No
Methanobrevibacter olleyae	Neutral	Normal	None	No
Methylacidimicrobium sp. B4	Neutral	Normal	None	No
Molluscum contagiosum virus	Neutral	Normal	None	No
Nitrobacter sp. NHB1	Neutral	Normal	None	No
Olleya sp. YS	Neutral	Normal	None	No
Paenibacillus elgii	Neutral	Normal	None	No
Paenibacillus sophorae	Neutral	Normal	None	No
Paenibacillus sp. 19GGS1-52	Neutral	Normal	None	No
Paenibacillus terrae	Neutral	Normal	None	No
Paraglaciecola sp. L1A13	Neutral	Normal	None	No
Parashewanella spongiae	Neutral	Normal	None	No
Polaribacter sp. HL-MS24	Neutral	Normal	None	No
Pontibacter sp. G13	Neutral	Normal	None	No
Prosthecochloris sp. CIB 2401	Neutral	Normal	None	No
Reichenbachiella agarivorans	Neutral	Normal	None	No
Scappvirus scapp	Neutral	Normal	None	No
Sciuriunavirus SscM1	Neutral	Normal	None	No
Seonamhaeicola sp. S2-3	Neutral	Normal	None	No
Shewanella avicenniae	Neutral	Normal	None	No
Shewanella sp. KX20019	Neutral	Normal	None	No
Siansivirga zeaxanthinifaciens	Neutral	Normal	None	No
Sneathiella marina	Neutral	Normal	None	No
Spiroplasma cantharicola	Neutral	Normal	None	No
Spiroplasma turonicum	Neutral	Normal	None	No
Sporolactobacillus terrae	Neutral	Normal	None	No
Taylorella asinigenitalis	Neutral	Normal	None	No
Tenacibaculum todarodis	Neutral	Normal	None	No
Terribacillus sp. DMT04	Neutral	Normal	None	No
Thalassolituus hydrocarboniclasticus	Neutral	Normal	None	No
Thalassospira sp. A40-3	Neutral	Normal	None	No
Thermacetogenium phaeum	Neutral	Normal	None	No
Thermobaculum terrenum	Neutral	Normal	None	No
Thermococcus celer	Neutral	Normal	None	No
Thermosynechococcus vestitus	Neutral	Normal	None	No
Triduovirus Tr2	Neutral	Normal	None	No
Vagococcus penaei	Neutral	Normal	None	No
Vibrio pectenicida	Neutral	Normal	None	No
Vibrio pelagius	Neutral	Normal	None	No
Vibrio taketomensis	Neutral	Normal	None	No
Xenorhabdus hominickii	Neutral	Normal	None	No
Zhouia spongiae	Neutral	Normal	None	No
[Mycoplasma] gypis	Neutral	Normal	None	No
Acidaminococcus intestini	Neutral	Normal	None	No
Alexandravirus SNUABM33	Neutral	Normal	None	No
Algibacter sp. L3A6	Neutral	Normal	None	No
Aliiglaciecola sp. LCG003	Neutral	Normal	None	No
Alkalicoccus halolimnae	Neutral	Normal	None	No
Alphabaculovirus alteragsegetum	Neutral	Normal	None	No
Arcanobacterium buesumense	Neutral	Normal	None	No
Aureibacter tunicatorum	Neutral	Normal	None	No
Bacillus spizizenii	Neutral	Normal	None	No
Bartonella clarridgeiae	Neutral	Normal	None	No
Campylobacter armoricus	Neutral	Normal	None	No
Campylobacter sp. RM10537	Neutral	Normal	None	No
Campylobacter vulpis	Neutral	Normal	None	No
Candidatus Atelocyanobacterium thalassa	Neutral	Normal	None	No
Candidatus Kinetoplastibacterium sorsogonicusi	Neutral	Normal	None	No
Candidatus Nitrososphaera gargensis	Neutral	Normal	None	No
Catenovulum sediminis	Neutral	Normal	None	No
Christiangramia oceanisediminis	Neutral	Normal	None	No
Chryseobacterium sp. MEBOG07	Neutral	Normal	None	No
Clostridium formicaceticum	Neutral	Normal	None	No
Croceimicrobium hydrocarbonivorans	Neutral	Normal	None	No
Cysteiniphilum sp. QT6929	Neutral	Normal	None	No
Desulfosporosinus meridiei	Neutral	Normal	None	No
Desulfosporosinus orientis	Neutral	Normal	None	No
Enterococcus sp. 9E7_DIV0242	Neutral	Normal	None	No
Exceevirus Xc38	Neutral	Normal	None	No
Flagellimonas maritima	Neutral	Normal	None	No
Fructilactobacillus fructivorans	Neutral	Normal	None	No
Gluconobacter sphaericus	Neutral	Normal	None	No
Gracilibacillus salitolerans	Neutral	Normal	None	No
Hahella sp. HNIBRBA332	Neutral	Normal	None	No
Halanaerobium hydrogeniformans	Neutral	Normal	None	No
Halobacillus salinarum	Neutral	Normal	None	No
Haloferax alexandrinus	Neutral	Normal	None	No
Halostagnicola larsenii	Neutral	Normal	None	No
Helicobacter cinaedi	Neutral	Yes	BSL-2	No
Hydrogenimonas cancrithermarum	Neutral	Normal	None	No
Hydrogenovibrio crunogenus	Neutral	Normal	None	No
Ignatzschineria rhizosphaerae	Neutral	Normal	None	No
Kayfunavirus IMM002	Neutral	Normal	None	No
Lentilitoribacter sp. Alg239-R112	Neutral	Normal	None	No
Maaswegvirus Kp24	Neutral	Normal	None	No
Mariniflexile sp. TRM1-10	Neutral	Normal	None	No
Marivirga tractuosa	Neutral	Normal	None	No
Methanomethylophilus alvi	Neutral	Normal	None	No
Methylotenera versatilis	Neutral	Normal	None	No
Mycoplasmoides fastidiosum	Neutral	Normal	None	No
Mycoplasmopsis felis	Neutral	Normal	None	No
Mycoplasmopsis pulmonis	Neutral	Normal	None	No
Neobacillus sp. OS1-2	Neutral	Normal	None	No
Oceanisphaera avium	Neutral	Normal	None	No
Paenibacillus chitinolyticus	Neutral	Normal	None	No
Paenibacillus sabinae	Neutral	Normal	None	No
Paenibacillus sp. FSL R7-0345	Neutral	Normal	None	No
Paenibacillus sp. HWE-109	Neutral	Normal	None	No
Paenibacillus sp. YPD9-1	Neutral	Normal	None	No
Paenibacillus yonginensis	Neutral	Normal	None	No
Picosynechococcus sp. PCC 7003	Neutral	Normal	None	No
Polaribacter vadi	Neutral	Normal	None	No
Polynucleobacter sp. HIN5	Neutral	Normal	None	No
Pseudoalteromonas espejiana	Neutral	Normal	None	No
Psychrobacter sp. 4Bb	Neutral	Normal	None	No
Saccharomyces kudriavzevii	Neutral	Normal	None	No
Salinimicrobium tongyeongense	Neutral	Normal	None	No
Shewanella livingstonensis	Neutral	Normal	None	No
Shewanella pealeana	Neutral	Normal	None	No
Staphylococcus coagulans	Neutral	Normal	None	No
Staphylococcus muscae	Neutral	Normal	None	No
Streptomyces avidinii	Neutral	Normal	None	No
Sulfurospirillum sp. 1612	Neutral	Normal	None	No
Synechococcus sp. CC9902	Neutral	Normal	None	No
Tenacibaculum tangerinum	Neutral	Normal	None	No
Thalassotalea crassostreae	Neutral	Normal	None	No
Thermococcus thioreducens	Neutral	Normal	None	No
Thermospira aquatica	Neutral	Normal	None	No
uncultured Marinifilum sp.	Neutral	Normal	None	No
Vibrio aerogenes	Neutral	Normal	None	No
Xenorhabdus sp. SF857	Neutral	Normal	None	No
Abyssalbus ytuae	Neutral	Normal	None	No
Acidovorax sp. 210-6	Neutral	Normal	None	No
Acinetobacter phage YMC13/03/R2096	Neutral	Normal	None	No
Amylolactobacillus amylophilus	Neutral	Normal	None	No
Arenibacter algicola	Neutral	Normal	None	No
Bacillus sp. FJAT-52991	Neutral	Normal	None	No
Bacteroides sp. MSB163	Neutral	Normal	None	No
Boudabousia tangfeifanii	Neutral	Normal	None	No
Buttiauxella agrestis	Neutral	Normal	None	No
Butyrivibrio proteoclasticus	Neutral	Normal	None	No
Campylobacter volucris	Neutral	Normal	None	No
Candidatus Kinetoplastibacterium crithidii	Neutral	Normal	None	No
Candidatus Phycorickettsia trachydisci	Neutral	Normal	None	No
Candidatus Vondammii sp. HM_W22	Neutral	Normal	None	No
Citrobacter rodentium	Neutral	Normal	None	No
Cloacibacillus porcorum	Neutral	Normal	None	No
Colwellia sp. 20A7	Neutral	Normal	None	No
Cycloclasticus zancles	Neutral	Normal	None	No
Desulfoluna limicola	Neutral	Normal	None	No
Desulfonema magnum	Neutral	Normal	None	No
Dictyoglomus thermophilum	Neutral	Normal	None	No
Escherichia sp. E4742	Neutral	Normal	None	No
Ferrimonas sp. YFM	Neutral	Normal	None	No
Flammeovirga yaeyamensis	Neutral	Normal	None	No
Halarcobacter bivalviorum	Neutral	Normal	None	No
Helicobacter enhydrae	Neutral	Normal	None	No
Kyrpidia tusciae	Neutral	Normal	None	No
Lacinutrix sp. WUR7	Neutral	Normal	None	No
Legionella sainthelensi	Neutral	Normal	None	No
Legionella spiritensis	Neutral	Normal	None	No
Leptospira sp. GIMC2001	Neutral	Normal	None	No
Levilactobacillus zymae	Neutral	Normal	None	No
Longitalea sp. SCSIO 12813	Neutral	Normal	None	No
Lonsdalea populi	Neutral	Normal	None	No
Maribacter cobaltidurans	Neutral	Normal	None	No
Marivirga harenae	Neutral	Normal	None	No
Methylophaga thalassica	Neutral	Normal	None	No
Nocardiopsis sp. YSL2	Neutral	Normal	None	No
Oceanobacillus jeddahense	Neutral	Normal	None	No
Olivibacter sp. SDN3	Neutral	Normal	None	No
Paraburkholderia bonniea	Neutral	Normal	None	No
Pirellula sp. SH-Sr6A	Neutral	Normal	None	No
Planococcus lenghuensis	Neutral	Normal	None	No
Polaribacter sp. Q13	Neutral	Normal	None	No
Proteus hauseri	Neutral	Normal	None	No
Providencia sp. PROV252	Neutral	Normal	None	No
Pseudemcibacter aquimaris	Neutral	Normal	None	No
Rickettsia australis	Neutral	Normal	None	No
Roseolovirus macacinebeta9	Neutral	Normal	None	No
Roseovarius sp. W115	Neutral	Normal	None	No
Saccharomyces eubayanus	Neutral	Normal	None	No
Serratia symbiotica	Neutral	Normal	None	No
Shewanella yunxiaonensis	Neutral	Normal	None	No
Silvanigrella aquatica	Neutral	Normal	None	No
Synechococcus sp. A15-24	Neutral	Normal	None	No
Thalassotalea agarivorans	Neutral	Normal	None	No
Thermococcus henrietii	Neutral	Normal	None	No
Turicibacter sp. TJ11	Neutral	Normal	None	No
Vagococcus teuberi	Neutral	Normal	None	No
Vibrio algicola	Neutral	Normal	None	No
Vibrio gallicus	Neutral	Normal	None	No
Vibrio sp. SS-MA-C1-2	Neutral	Normal	None	No
Winogradskyella schleiferi	Neutral	Normal	None	No
Xenorhabdus griffiniae	Neutral	Normal	None	No
Yersinia pseudotuberculosis	Neutral	Yes	BSL-2	No
Acaryochloris sp. 'Moss Beach'	Neutral	Normal	None	No
Acetomicrobium mobile	Neutral	Normal	None	No
Aliamphritea spongicola	Neutral	Normal	None	No
Alkalimarinus sediminis	Neutral	Normal	None	No
Alkalitalea saponilacus	Neutral	Normal	None	No
Amphritea atlantica	Neutral	Normal	None	No
Aneurinibacillus sp. Ricciae_BoGa-3	Neutral	Normal	None	No
Aurantimicrobium photophilum	Neutral	Normal	None	No
Bartonella apihabitans	Neutral	Normal	None	No
Bifidobacterium lemurum	Neutral	Normal	None	No
Biomaibacter acetigenes	Neutral	Normal	None	No
Caldanaerobacter subterraneus	Neutral	Normal	None	No
Candidatus Endomicrobium trichonymphae	Neutral	Normal	None	No
Candidatus Nanopelagicus abundans	Neutral	Normal	None	No
Candidatus Reidiella endopervernicosa	Neutral	Normal	None	No
Candidatus Thiodiazotropha sp. CDECU1	Neutral	Normal	None	No
Candidatus Thioglobus sp. NP1	Neutral	Normal	None	No
Caproicibacterium lactatifermentans	Neutral	Normal	None	No
Carboxydocella thermautotrophica	Neutral	Normal	None	No
Carjivirus communis	Neutral	Normal	None	No
Changchengzhania lutea	Neutral	Normal	None	No
Clostridium carboxidivorans	Neutral	Normal	None	No
Crateriforma conspicua	Neutral	Normal	None	No
Cylindrospermopsis curvispora	Neutral	Normal	None	No
Desulfuromonas soudanensis	Neutral	Normal	None	No
Erwinia pyrifoliae	Neutral	Normal	None	No
Gilliamella sp. ESL0443	Neutral	Normal	None	No
Gimesia alba	Neutral	Normal	None	No
Hydrogenobacter thermophilus	Neutral	Normal	None	No
Kahnovirus copri	Neutral	Normal	None	No
Labilibaculum sp.	Neutral	Normal	None	No
Lactococcus sp. NH2-7C	Neutral	Normal	None	No
Legionella geestiana	Neutral	Normal	None	No
Leishmania braziliensis	Neutral	Normal	None	No
Methanobacterium lacus	Neutral	Normal	None	No
Methanosphaera sp. ISO3-F5	Neutral	Normal	None	No
Microbulbifer sp. VAAF005	Neutral	Normal	None	No
Moritella sp. 24	Neutral	Normal	None	No
Moumouvirus australiense	Neutral	Normal	None	No
Mycobacterium leprae	Neutral	Yes	BSL-2	No
Mycoplasmopsis equigenitalium	Neutral	Normal	None	No
Natronosalvus rutilus	Neutral	Normal	None	No
Nocardia sp. NBC_01377	Neutral	Normal	None	No
Oceanobacillus sp. FSL K6-2867	Neutral	Normal	None	No
Paenibacillus cellulositrophicus	Neutral	Normal	None	No
Paenibacillus sp. PSB04	Neutral	Normal	None	No
Picosynechococcus sp. PCC 73109	Neutral	Normal	None	No
Polynucleobacter acidiphobus	Neutral	Normal	None	No
Pontibacillus chungwhensis	Neutral	Normal	None	No
Pontimonas salivibrio	Neutral	Normal	None	No
Pseudodesulfovibrio sp. zrk46	Neutral	Normal	None	No
Psychroflexus torquis	Neutral	Normal	None	No
Rickettsiales endosymbiont of Stachyamoeba lipophora	Neutral	Normal	None	No
Rickettsiella endosymbiont of Aleochara curtula	Neutral	Normal	None	No
Secundilactobacillus malefermentans	Neutral	Normal	None	No
Sphingobacterium sp. E70	Neutral	Normal	None	No
Spirobacillus cienkowskii	Neutral	Normal	None	No
Spiroplasma culicicola	Neutral	Normal	None	No
Spiroplasma sp. TIUS-1	Neutral	Normal	None	No
Synechococcus sp. MIT S9220	Neutral	Normal	None	No
Tatumella citrea	Neutral	Normal	None	No
Tenacibaculum mesophilum	Neutral	Normal	None	No
Thalassospira tepidiphila	Neutral	Normal	None	No
Thermoanaerobacter sp. RKWS2	Neutral	Normal	None	No
Thiomicrospira microaerophila	Neutral	Normal	None	No
uncultured Desulfuromusa sp.	Neutral	Normal	None	No
Vibrio sp. JC009	Neutral	Normal	None	No
Vibrio sp. SCSIO 43136	Neutral	Normal	None	No
Viridibacillus sp. JNUCC-6	Neutral	Normal	None	No
Acidianus ambivalens	Neutral	Normal	None	No
Bacteroides helcogenes	Neutral	Normal	None	No
Buttiauxella sp. WJP83	Neutral	Normal	None	No
Candidatus Azobacteroides pseudotrichonymphae	Neutral	Normal	None	No
Candidatus Methylopumilus universalis	Neutral	Normal	None	No
Cbunavirus A41	Neutral	Normal	None	No
Denitromonas iodatirespirans	Neutral	Normal	None	No
Haladaptatus caseinilyticus	Neutral	Normal	None	No
Jejubacter calystegiae	Neutral	Normal	None	No
Jeotgalibaca sp. MA1X17-3	Neutral	Normal	None	No
Kochitakasuvirus KPP25	Neutral	Normal	None	No
Lactiplantibacillus carotarum	Neutral	Normal	None	No
Legionella hackeliae	Neutral	Normal	None	No
Limihaloglobus sulfuriphilus	Neutral	Normal	None	No
Mycoplasma sp. Pen4	Neutral	Normal	None	No
Mycoplasmopsis bovigenitalium	Neutral	Normal	None	No
Natrinema pellirubrum	Neutral	Normal	None	No
Nitratifractor salsuginis	Neutral	Normal	None	No
Nitrospira sp. KM1	Neutral	Normal	None	No
Orientia tsutsugamushi	Neutral	Normal	None	No
Oxalobacter formigenes	Neutral	Normal	None	No
Paenibacillus marchantiae	Neutral	Normal	None	No
Paenibacillus protaetiae	Neutral	Normal	None	No
Paenibacillus sp. sptzw28	Neutral	Normal	None	No
Phietavirus pv37	Neutral	Normal	None	No
Polaribacter reichenbachii	Neutral	Normal	None	No
Polynucleobacter sp. TSB-Sco08W16	Neutral	Normal	None	No
Pseudonocardia oceani	Neutral	Normal	None	No
Pseudovibrio sp. FO-BEG1	Neutral	Normal	None	No
RD114 retrovirus	Neutral	Normal	None	No
Rhodoluna sp. KAS3	Neutral	Normal	None	No
Salvavirus salva	Neutral	Normal	None	No
Shewanella oneidensis	Neutral	Normal	None	No
Spiroplasma endosymbiont of Notiophilus biguttatus	Neutral	Normal	None	No
Sporosarcina sp. FSL W8-0480	Neutral	Normal	None	No
Sulfurimonas sp.	Neutral	Normal	None	No
Sulfurospirillum diekertiae	Neutral	Normal	None	No
Tenacibaculum sp. HL-MS23	Neutral	Normal	None	No
Thermococcus peptonophilus	Neutral	Normal	None	No
Vagococcus hydrophili	Neutral	Normal	None	No
Vibrio gazogenes	Neutral	Normal	None	No
Vibrio panuliri	Neutral	Normal	None	No
Yersinia entomophaga	Neutral	Normal	None	No
Alistipes ihumii	Neutral	Normal	None	No
Babesia bovis	Neutral	Normal	None	No
Borrelia sp. P9F1	Neutral	Normal	None	No
Brevibacillus humidisoli	Neutral	Normal	None	No
Candidatus Cloacimonas acidaminovorans	Neutral	Normal	None	No
Candidatus Nitrospira neomarina	Neutral	Normal	None	No
Citrobacter arsenatis	Neutral	Normal	None	No
Desulfobacca acetoxidans	Neutral	Normal	None	No
Gammapapillomavirus 13	Neutral	Normal	None	No
Grimontia kaedaensis	Neutral	Normal	None	No
Lelliottia sp. AC1	Neutral	Normal	None	No
Lutibacter sp. A64	Neutral	Normal	None	No
Maribacter halichondriae	Neutral	Normal	None	No
Metamycoplasma hyosynoviae	Neutral	Normal	None	No
Mycoplasma mycoides	Neutral	Normal	None	No
Mycoplasmoides pneumoniae	Neutral	Normal	None	No
Nitrosospira sp. Is2	Neutral	Normal	None	No
Olleya sp. HaHaR_3_96	Neutral	Normal	None	No
Paenalcaligenes faecalis	Neutral	Normal	None	No
Paenibacillus sp. MMS20-IR301	Neutral	Normal	None	No
Paenibacillus sp. R14(2021)	Neutral	Normal	None	No
Polynucleobacter corsicus	Neutral	Normal	None	No
Pontibacillus sp. HMF3514	Neutral	Normal	None	No
Poseidonibacter lekithochrous	Neutral	Normal	None	No
Pradovirus XAJ24	Neutral	Normal	None	No
Prodigiosinella confusarubida	Neutral	Normal	None	No
Providencia sp. PROV188	Neutral	Normal	None	No
Psychrobacter sp. MES7-P7E	Neutral	Normal	None	No
Pusillibacter faecalis	Neutral	Normal	None	No
Pyrobaculum neutrophilum	Neutral	Normal	None	No
Rossellomorea sp. y25	Neutral	Normal	None	No
Sphaerochaeta globosa	Neutral	Normal	None	No
Spiroplasma gladiatoris	Neutral	Normal	None	No
Streptococcus sp. 29887	Neutral	Normal	None	No
Streptomyces liliiviolaceus	Neutral	Normal	None	No
Streptomyces sp. NBC_01643	Neutral	Normal	None	No
Symbiopectobacterium purcellii	Neutral	Normal	None	No
Thermoclostridium stercorarium	Neutral	Normal	None	No
Thermodesulfovibrio yellowstonii	Neutral	Normal	None	No
Thermofilum pendens	Neutral	Normal	None	No
Aerococcus urinaehominis	Neutral	Normal	None	No
Algoriphagus sp. Y33	Neutral	Normal	None	No
Aureliella helgolandensis	Neutral	Normal	None	No
Bacillus badius	Neutral	Normal	None	No
Candidatus Ruthia endofausta	Neutral	Normal	None	No
Ethanoligenens harbinense	Neutral	Normal	None	No
Flagellimonas sp. CMM7	Neutral	Normal	None	No
Flavobacterium ammonificans	Neutral	Normal	None	No
Flavobacterium cerinum	Neutral	Normal	None	No
Francisella hispaniensis	Neutral	Normal	None	No
Haloarcula hispanica	Neutral	Normal	None	No
Iodobacter fluviatilis	Neutral	Normal	None	No
Lacinutrix sp. 5H-3-7-4	Neutral	Normal	None	No
Lentilactobacillus buchneri	Neutral	Normal	None	No
Lutibacter sp. A80	Neutral	Normal	None	No
Methanosarcina sp. MTP4	Neutral	Normal	None	No
Miamivirus miami	Neutral	Normal	None	No
Mucilaginibacter ginsenosidivorax	Neutral	Normal	None	No
Mucilaginibacter paludis	Neutral	Normal	None	No
Mycolicibacterium sp. P1-18	Neutral	Normal	None	No
Natronomonas pharaonis	Neutral	Normal	None	No
Natronosalvus vescus	Neutral	Normal	None	No
Neokomagataea tanensis	Neutral	Normal	None	No
Nicoliella spurrieriana	Neutral	Normal	None	No
Oceanisphaera sp. IT1-181	Neutral	Normal	None	No
Oceanispirochaeta crateris	Neutral	Normal	None	No
Oleiphilus messinensis	Neutral	Normal	None	No
Paenibacillus alvei	Neutral	Normal	None	No
Paenibacillus sp. IHBB 10380	Neutral	Normal	None	No
Parasaccharibacter apium	Neutral	Normal	None	No
Prochlorococcus sp. MIT 1223	Neutral	Normal	None	No
Pseudomonas sp. LTR0	Neutral	Normal	None	No
Pyrobaculum calidifontis	Neutral	Normal	None	No
Ruminococcus champanellensis	Neutral	Normal	None	No
Sulfurospirillum cavolei	Neutral	Normal	None	No
Sutcliffiella sp. NC1	Neutral	Normal	None	No
Thiothrix unzii	Neutral	Normal	None	No
Vespertiliibacter pulmonis	Neutral	Normal	None	No
Virgibacillus halodenitrificans	Neutral	Normal	None	No
Adhaeretor mobilis	Neutral	Normal	None	No
Alkalihalobacillus sp. LMS39	Neutral	Normal	None	No
Bacillus carboniphilus	Neutral	Normal	None	No
Borreliella garinii	Neutral	Normal	None	No
Candidatus Nitrosotenuis cloacae	Neutral	Normal	None	No
Candidatus Planktophila lacus	Neutral	Normal	None	No
Chryseobacterium paludis	Neutral	Normal	None	No
Clostridium sp. SY8519	Neutral	Normal	None	No
Cobetia sp. cqz5-12	Neutral	Normal	None	No
Cohnella herbarum	Neutral	Normal	None	No
Coxiella endosymbiont of Amblyomma sculptum	Neutral	Normal	None	No
Desulfomarina profundi	Neutral	Normal	None	No
Dokdonia sp. PRO95	Neutral	Normal	None	No
Euhalothece natronophila	Neutral	Normal	None	No
Francisella philomiragia	Neutral	Normal	None	No
Gelderlandvirus melville	Neutral	Normal	None	No
Geobacter sp. FeAm09	Neutral	Normal	None	No
Gilliamella apis	Neutral	Normal	None	No
Haladaptatus sp. YSMS36	Neutral	Normal	None	No
Halarcobacter anaerophilus	Neutral	Normal	None	No
Halorhabdus sp. SVX81	Neutral	Normal	None	No
Ilyobacter polytropus	Neutral	Normal	None	No
Lactococcus formosensis	Neutral	Normal	None	No
Lymphocryptovirus humangamma4	Neutral	Normal	None	No
Lymphocryptovirus macacinegamma13	Neutral	Normal	None	No
Marinobacter salinus	Neutral	Normal	None	No
Methanocaldococcus sp. FS406-22	Neutral	Normal	None	No
Methanosphaera stadtmanae	Neutral	Normal	None	No
Mucilaginibacter gotjawali	Neutral	Normal	None	No
Natrialbaceae archaeon AArc-T1-2	Neutral	Normal	None	No
Natronomonas halophila	Neutral	Normal	None	No
Olleya sp. Bg11-27	Neutral	Normal	None	No
Paenibacillus hunanensis	Neutral	Normal	None	No
Parvularcula sp. IMCC14364	Neutral	Normal	None	No
Petrotoga mobilis	Neutral	Normal	None	No
Polynucleobacter sp. TUM22923	Neutral	Normal	None	No
Prevotella sp. E15-22	Neutral	Normal	None	No
Pseudotevenvirus gap161	Neutral	Normal	None	No
Ruminiclostridium papyrosolvens	Neutral	Normal	None	No
Sphingobacterium sp. SRCM116780	Neutral	Normal	None	No
Spiroplasma platyhelix	Neutral	Normal	None	No
Streptococcus phage YMC-2011	Neutral	Normal	None	No
Streptomyces sp. NBC_01276	Neutral	Normal	None	No
Sulfurovum indicum	Neutral	Normal	None	No
Thermus phage TMA	Neutral	Normal	None	No
Thiosulfativibrio zosterae	Neutral	Normal	None	No
Treponema peruense	Neutral	Normal	None	No
Vagococcus coleopterorum	Neutral	Normal	None	No
Winogradskyella forsetii	Neutral	Normal	None	No
Wolbachia endosymbiont of Dipetalonema caudispina	Neutral	Normal	None	No
Actinobacillus suis	Neutral	Normal	None	No
Aquimarina sp. Aq107	Neutral	Normal	None	No
Bartonella birtlesii	Neutral	Normal	None	No
Bordetella genomosp. 6	Neutral	Normal	None	No
Candidatus Amoebophilus asiaticus	Neutral	Normal	None	No
Candidatus Bealeia paramacronuclearis	Neutral	Normal	None	No
Candidatus Rhodoluna planktonica	Neutral	Normal	None	No
Candidatus Westeberhardia cardiocondylae	Neutral	Normal	None	No
Colwellia sp. Arc7-635	Neutral	Normal	None	No
Companilactobacillus paralimentarius	Neutral	Normal	None	No
Cryobacterium sp.	Neutral	Normal	None	No
Drulisvirus KPRio2015	Neutral	Normal	None	No
Edaphobacter sp. 12200R-103	Neutral	Normal	None	No
Edwardsiella ictaluri	Neutral	Normal	None	No
Flavobacterium branchiophilum	Neutral	Normal	None	No
Francisella persica	Neutral	Normal	None	No
Halanaerobium praevalens	Neutral	Normal	None	No
Herbinix luporum	Neutral	Normal	None	No
Imtechella halotolerans	Neutral	Normal	None	No
Ktedonosporobacter rubrisoli	Neutral	Normal	None	No
Leptolyngbya sp. O-77	Neutral	Normal	None	No
Marinobacter salinisoli	Neutral	Normal	None	No
Methylomonas sp. LL1	Neutral	Normal	None	No
Natronomonas gomsonensis	Neutral	Normal	None	No
Nonlabens sp. MB-3u-79	Neutral	Normal	None	No
Pectobacterium parmentieri	Neutral	Normal	None	No
Polaribacter dokdonensis	Neutral	Normal	None	No
Polaribacter sp. SA4-12	Neutral	Normal	None	No
Polynucleobacter sp. MWH-UH24A	Neutral	Normal	None	No
Pseudanabaena sp. PCC 7367	Neutral	Normal	None	No
Pseudoalteromonas sp. 1_2015MBL_MicDiv	Neutral	Normal	None	No
Saccharolobus solfataricus	Neutral	Normal	None	No
Sodalis glossinidius	Neutral	Normal	None	No
Staphylococcus croceilyticus	Neutral	Normal	None	No
uncultured Methanobacterium sp.	Neutral	Normal	None	No
Vibrio sp. HDW18	Neutral	Normal	None	No
Zhaonella formicivorans	Neutral	Normal	None	No
Acutalibacter muris	Neutral	Normal	None	No
Alkalibacter rhizosphaerae	Neutral	Normal	None	No
Bacterioplanoides sp. SCSIO 12839	Neutral	Normal	None	No
Bacteroides finegoldii	Neutral	Normal	None	No
Berryella intestinalis	Neutral	Normal	None	No
Bombiscardovia apis	Neutral	Normal	None	No
Breznakiella homolactica	Neutral	Normal	None	No
Campylobacter canadensis	Neutral	Normal	None	No
Candidatus Epulonipiscium viviparus	Neutral	Normal	None	No
Candidatus Planktophila sulfonica	Neutral	Normal	None	No
Clostridium cadaveris	Neutral	Yes	BSL-2	No
Cyanobacterium sp. Dongsha4	Neutral	Normal	None	No
Cyclobacterium amurskyense	Neutral	Normal	None	No
Defluviitalea saccharophila	Neutral	Normal	None	No
Desulfobaculum bizertense	Neutral	Normal	None	No
Desulfobulbus propionicus	Neutral	Normal	None	No
Gallaecimonas mangrovi	Neutral	Normal	None	No
Glaciimonas sp. PAMC28666	Neutral	Normal	None	No
Gloeomargarita lithophora	Neutral	Normal	None	No
Haloplanus sp. CK5-1	Neutral	Normal	None	No
Ignavibacterium album	Neutral	Normal	None	No
Legionella israelensis	Neutral	Normal	None	No
Lysinibacillus timonensis	Neutral	Normal	None	No
Mucilaginibacter xinganensis	Neutral	Normal	None	No
Myroides odoratimimus	Neutral	Normal	None	No
Natronosalvus halobius	Neutral	Normal	None	No
Nitrospina watsonii	Neutral	Normal	None	No
Paenibacillus sp. BIHB 4019	Neutral	Normal	None	No
Paenibacillus sp. FSL W8-0194	Neutral	Normal	None	No
Paenibacillus swuensis	Neutral	Normal	None	No
Piscirickettsia salmonis	Neutral	Normal	None	No
Polynucleobacter sp. MWH-Spelu-300-X4	Neutral	Normal	None	No
Psychrobacter sp. L7	Neutral	Normal	None	No
Rhizobium sp. CB3060	Neutral	Normal	None	No
Shewanella maritima	Neutral	Normal	None	No
Sinomicrobium kalidii	Neutral	Normal	None	No
Skunavirus sv38507	Neutral	Normal	None	No
Sporosarcina sp. FSL K6-1522	Neutral	Normal	None	No
Sulfuriflexus mobilis	Neutral	Normal	None	No
Sulfurospirillum deleyianum	Neutral	Normal	None	No
Thermodesulfobium narugense	Neutral	Normal	None	No
Thermosynechococcus sp. NK55a	Neutral	Normal	None	No
uncultured Enterococcus sp.	Neutral	Normal	None	No
uncultured Holophaga sp.	Neutral	Normal	None	No
Yersinia ruckeri	Neutral	Normal	None	No
Acididesulfobacillus acetoxydans	Neutral	Normal	None	No
Bifidobacterium sp. ESL0682	Neutral	Normal	None	No
Campylobacter sp. RM12651	Neutral	Normal	None	No
Clostridium sp. JN-1	Neutral	Normal	None	No
Clostridium sp. JS66	Neutral	Normal	None	No
Desulfococcus multivorans	Neutral	Normal	None	No
Desulfurobacterium thermolithotrophum	Neutral	Normal	None	No
Flammeovirga pectinis	Neutral	Normal	None	No
Flavobacterium haoranii	Neutral	Normal	None	No
Gloeobacter violaceus	Neutral	Normal	None	No
Halobacteriovorax sp. BALOs_7	Neutral	Normal	None	No
Kayfunavirus EcoDS1	Neutral	Normal	None	No
Legionella oakridgensis	Neutral	Normal	None	No
Legionella sp. PC1000	Neutral	Normal	None	No
Leptospirillum ferrooxidans	Neutral	Normal	None	No
Marinomonas pontica	Neutral	Normal	None	No
Maritalea myrionectae	Neutral	Normal	None	No
Megasphaera hexanoica	Neutral	Normal	None	No
Methanothrix soehngenii	Neutral	Normal	None	No
Methylobacter sp. S3L5C	Neutral	Normal	None	No
Mycoplasmopsis synoviae	Neutral	Normal	None	No
Neobacillus sp. PS3-12	Neutral	Normal	None	No
Paenibacillus cellulosilyticus	Neutral	Normal	None	No
Pectinatus frisingensis	Neutral	Normal	None	No
Plasmodium reichenowi	Neutral	Normal	None	No
Polaribacter sp. Hel1_33_78	Neutral	Normal	None	No
Prochlorococcus sp. MIT 1314	Neutral	Normal	None	No
Providencia stuartii	Neutral	Yes	BSL-2	No
Pseudomonas phage JG054	Neutral	Normal	None	No
Roseiflexus sp. RS-1	Neutral	Normal	None	No
Rossellomorea aquimaris	Neutral	Normal	None	No
Salinimicrobium sp. 3283s	Neutral	Normal	None	No
Salisediminibacterium beveridgei	Neutral	Normal	None	No
Shewanella amazonensis	Neutral	Normal	None	No
Sulfurospirillum multivorans	Neutral	Normal	None	No
Thermaerobacter sp. FW80	Neutral	Normal	None	No
Tinduovirus TIN3	Neutral	Normal	None	No
Vibrio cyclitrophicus	Neutral	Normal	None	No
Vibrio porteresiae	Neutral	Normal	None	No
Yoonia sp. SS1-5	Neutral	Normal	None	No
Zunongwangia profunda	Neutral	Normal	None	No
Aeromonas sp. CU5	Neutral	Normal	None	No
Aggregatibacter phage S1249	Neutral	Normal	None	No
Amnibacterium kyonggiense	Neutral	Normal	None	No
Aurantimicrobium minutum	Neutral	Normal	None	No
Berryella wangjianweii	Neutral	Normal	None	No
Bifidobacterium sp. ESL0728	Neutral	Normal	None	No
Bombilactobacillus bombi	Neutral	Normal	None	No
Campylobacter iguaniorum	Neutral	Normal	None	No
Candidatus Bipolaricaulis anaerobius	Neutral	Normal	None	No
Chryseobacterium nepalense	Neutral	Normal	None	No
Companilactobacillus zhachilii	Neutral	Normal	None	No
Coxiella endosymbiont of Amblyomma nuttalli	Neutral	Normal	None	No
Crocosphaera subtropica	Neutral	Normal	None	No
Desulfosporosinus youngiae	Neutral	Normal	None	No
Edaphobacter sp. 4G125	Neutral	Normal	None	No
Enterobacter sp. PGRG2	Neutral	Normal	None	No
Enterococcus sp. CR-Ec1	Neutral	Normal	None	No
Flammeovirga sp. MY04	Neutral	Normal	None	No
Haematospirillum jordaniae	Neutral	Normal	None	No
Halohasta litchfieldiae	Neutral	Normal	None	No
Kineothrix sp. MB12-C1	Neutral	Normal	None	No
Leisingera sp. M658	Neutral	Normal	None	No
Malaciobacter marinus	Neutral	Normal	None	No
Mesotoga infera	Neutral	Normal	None	No
Metamycoplasma equirhinis	Neutral	Normal	None	No
Methanococcoides orientis	Neutral	Normal	None	No
Methanosarcina mazei	Neutral	Normal	None	No
Naumovozyma castellii	Neutral	Normal	None	No
Neobacillus sp. WH10	Neutral	Normal	None	No
Nitrosomonas eutropha	Neutral	Normal	None	No
Nonlabens sp. Ci31	Neutral	Normal	None	No
Paenibacillus lautus	Neutral	Normal	None	No
Paenisporosarcina antarctica	Neutral	Normal	None	No
Parabacteroides faecis	Neutral	Normal	None	No
Polaribacter haliotis	Neutral	Normal	None	No
Polynucleobacter sp. VK25	Neutral	Normal	None	No
Pseudoalteromonas sp. R3	Neutral	Normal	None	No
Pseudobutyrivibrio xylanivorans	Neutral	Normal	None	No
Shewanella litorisediminis	Neutral	Normal	None	No
Shewanella rhizosphaerae	Neutral	Normal	None	No
Simplexvirus atelinealpha1	Neutral	Normal	None	No
Solibaculum mannosilyticum	Neutral	Normal	None	No
Sulfurovum mangrovi	Neutral	Normal	None	No
Terriglobus saanensis	Neutral	Normal	None	No
Undibacterium sp. 20NA77.5	Neutral	Normal	None	No
Vibrio fortis	Neutral	Normal	None	No
Vibrio rhizosphaerae	Neutral	Normal	None	No
Xenorhabdus doucetiae	Neutral	Normal	None	No
Advenella alkanexedens	Neutral	Normal	None	No
Arcobacter acticola	Neutral	Normal	None	No
Bartonella sp. TP	Neutral	Normal	None	No
Blochmannia endosymbiont of Camponotus nipponensis	Neutral	Normal	None	No
Bruynoghevirus Ab22	Neutral	Normal	None	No
Campylobacter lari	Neutral	Yes	BSL-2	No
Candidatus Endoriftia persephone	Neutral	Normal	None	No
Carboxydothermus hydrogenoformans	Neutral	Normal	None	No
Citrobacter freundii complex sp. CFNIH2	Neutral	Normal	None	No
Clostridium cochlearium	Neutral	Normal	None	No
Clostridium tyrobutyricum	Neutral	Normal	None	No
Drulisvirus myPSH1235	Neutral	Normal	None	No
Echinicola sp. 20G	Neutral	Normal	None	No
Erythrobacter sp. Alg231-14	Neutral	Normal	None	No
Gimesia chilikensis	Neutral	Normal	None	No
Halorubrum trapanicum	Neutral	Normal	None	No
Halorussus pelagicus	Neutral	Normal	None	No
Infirmifilum lucidum	Neutral	Normal	None	No
Maxrubnervirus PMBT3	Neutral	Normal	None	No
Methanobrevibacter ruminantium	Neutral	Normal	None	No
Methanogenium sp. S4BF	Neutral	Normal	None	No
Methanosarcina siciliae	Neutral	Normal	None	No
Methylomonas sp. EFPC3	Neutral	Normal	None	No
Muriicola soli	Neutral	Normal	None	No
Natrinema gelatinilyticum	Neutral	Normal	None	No
Nitrosospira multiformis	Neutral	Normal	None	No
Paenalcaligenes hominis	Neutral	Normal	None	No
Peribacillus butanolivorans	Neutral	Normal	None	No
Periweissella cryptocerci	Neutral	Normal	None	No
Photorhabdus akhurstii	Neutral	Normal	None	No
Porcine type-C oncovirus	Neutral	Normal	None	No
Salipaludibacillus sp. LMS25	Neutral	Normal	None	No
Sphingomonas phage vB_StuS_MMDA13	Neutral	Normal	None	No
Spiroplasma sabaudiense	Neutral	Normal	None	No
Thermoanaerobacter sp. X514	Neutral	Normal	None	No
Thermosediminibacter oceani	Neutral	Normal	None	No
Thermus sp. 4C	Neutral	Normal	None	No
uncultured Acetobacterium sp.	Neutral	Normal	None	No
Vibrio chagasii	Neutral	Normal	None	No
Xylocopilactobacillus apis	Neutral	Normal	None	No
Acetivibrio clariflavus	Neutral	Normal	None	No
Aequorivita sp. Ant34-E75	Neutral	Normal	None	No
Aeropyrum pernix	Neutral	Normal	None	No
Allobacillus halotolerans	Neutral	Normal	None	No
Allocoprobacillus halotolerans	Neutral	Normal	None	No
Avian endogenous retrovirus EAV-HP	Neutral	Normal	None	No
Bacillus sp. OxB-1	Neutral	Normal	None	No
Betapapillomavirus 1	Neutral	Normal	None	No
Candidatus Azoamicus ciliaticola	Neutral	Normal	None	No
Cedecea sp. FDAARGOS_727	Neutral	Normal	None	No
Chloroflexus aggregans	Neutral	Normal	None	No
Companilactobacillus futsaii	Neutral	Normal	None	No
Dissulfurispira thermophila	Neutral	Normal	None	No
Flavobacterium sp. xlx-214	Neutral	Normal	None	No
Gramella sp. MT6	Neutral	Normal	None	No
Lacinutrix venerupis	Neutral	Normal	None	No
Limosilactobacillus pontis	Neutral	Normal	None	No
Liquorilactobacillus mali	Neutral	Normal	None	No
Longicatena caecimuris	Neutral	Normal	None	No
Lysinibacter sp. HNR	Neutral	Normal	None	No
Maribacter sp. MJ134	Neutral	Normal	None	No
Marinobacterium iners	Neutral	Normal	None	No
Methanoregula formicica	Neutral	Normal	None	No
Mucilaginibacter mallensis	Neutral	Normal	None	No
Mycoplasmopsis felifaucium	Neutral	Normal	None	No
Paenibacillus bovis	Neutral	Normal	None	No
Paenibacillus riograndensis	Neutral	Normal	None	No
Paenibacillus sp. PK3_47	Neutral	Normal	None	No
Permianibacter aggregans	Neutral	Normal	None	No
Plasmodium knowlesi	Neutral	Normal	None	No
Providencia sp. R33	Neutral	Normal	None	No
Pseudoalteromonas sp. DL-6	Neutral	Normal	None	No
Pseudoalteromonas spongiae	Neutral	Normal	None	No
Pseudomonas tremae	Neutral	Normal	None	No
Pseudomonas virus PAE1	Neutral	Normal	None	No
Rhizobium sp. K102	Neutral	Normal	None	No
Salinimonas sediminis	Neutral	Normal	None	No
Shewanella acanthi	Neutral	Normal	None	No
Shewanella dokdonensis	Neutral	Normal	None	No
Sideroxydans sp. CL21	Neutral	Normal	None	No
Sulfurihydrogenibium azorense	Neutral	Normal	None	No
Sulfuriroseicoccus oceanibius	Neutral	Normal	None	No
Sutterella wadsworthensis	Neutral	Normal	None	No
Synechococcus sp. PCC 7502	Neutral	Normal	None	No
Tenacibaculum ovolyticum	Neutral	Normal	None	No
Terasakiella sp. SH-1	Neutral	Normal	None	No
Teredinibacter sp. KSP-S5-2	Neutral	Normal	None	No
Thioclava sp. FTW29	Neutral	Normal	None	No
Varicellovirus equidalpha3	Neutral	Normal	None	No
Aliarcobacter trophiarum	Neutral	Normal	None	No
Bacillus weihaiensis	Neutral	Normal	None	No
Bifidobacterium sp. ESL0704	Neutral	Normal	None	No
Burkholderia sp. MS455	Neutral	Normal	None	No
Candidatus Filomicrobium marinum	Neutral	Normal	None	No
Candidatus Formimonas warabiya	Neutral	Normal	None	No
Candidatus Pseudothioglobus singularis	Neutral	Normal	None	No
Cytobacillus spongiae	Neutral	Normal	None	No
Desulfobacter postgatei	Neutral	Normal	None	No
Desulfofustis limnaeus	Neutral	Normal	None	No
Desulfomicrobium baculatum	Neutral	Normal	None	No
Draconibacterium orientale	Neutral	Normal	None	No
Erwinia pyri	Neutral	Normal	None	No
Flavobacterium sp. IMCC34852	Neutral	Normal	None	No
Flavobacterium sp. N3904	Neutral	Normal	None	No
Halobacillus naozhouensis	Neutral	Normal	None	No
Haloferax mediterranei	Neutral	Normal	None	No
Halomonas sp. SH5A2	Neutral	Normal	None	No
Halomonas sp. TD01	Neutral	Normal	None	No
Kluyvera sp. CRP	Neutral	Normal	None	No
Kosmotoga pacifica	Neutral	Normal	None	No
Leclercia sp. W6	Neutral	Normal	None	No
Lonsdalea britannica	Neutral	Normal	None	No
Marinimicrobium sp. C6131	Neutral	Normal	None	No
Marinobacter salsuginis	Neutral	Normal	None	No
Paenibacillus azoreducens	Neutral	Normal	None	No
Paenibacillus konkukensis	Neutral	Normal	None	No
Pirellula staleyi	Neutral	Normal	None	No
Polynucleobacter sp. AP-Elch-400A-B2	Neutral	Normal	None	No
Pseudalkalibacillus hwajinpoensis	Neutral	Normal	None	No
Pyrobaculum ferrireducens	Neutral	Normal	None	No
Scandinavium goeteborgense	Neutral	Normal	None	No
Serratia sp. UGAL515B_01	Neutral	Normal	None	No
Shewanella chilikensis	Neutral	Normal	None	No
Sphingorhabdus sp. Alg231-15	Neutral	Normal	None	No
Spirochaeta africana	Neutral	Normal	None	No
Spiroplasma sp. BIUS-1	Neutral	Normal	None	No
Spongiibacter nanhainus	Neutral	Normal	None	No
Syntrophobacter fumaroxidans	Neutral	Normal	None	No
Tuwongella immobilis	Neutral	Normal	None	No
Vibrio mediterranei	Neutral	Normal	None	No
Winogradskyella sediminis	Neutral	Normal	None	No
Acidovorax sp. SUPP3334	Neutral	Normal	None	No
Aliamphritea hakodatensis	Neutral	Normal	None	No
Burkholderia sp. PAMC 28687	Neutral	Normal	None	No
Campylobacter hyointestinalis	Neutral	Yes	BSL-2	No
Campylobacter sputorum	Neutral	Yes	BSL-2	No
Candidatus Kuenenia stuttgartiensis	Neutral	Normal	None	No
Cellulophaga sp. HaHaR_3_176	Neutral	Normal	None	No
Cyclonatronum proteinivorum	Neutral	Normal	None	No
Desulfoglaeba alkanexedens	Neutral	Normal	None	No
Dokdonia sp. Dokd-P16	Neutral	Normal	None	No
Drulisvirus KpV48	Neutral	Normal	None	No
Flavobacterium arcticum	Neutral	Normal	None	No
Gillisia sp. Hel1_33_143	Neutral	Normal	None	No
Halalkaliarchaeum desulfuricum	Neutral	Normal	None	No
Haloprofundus sp. MHR1	Neutral	Normal	None	No
Mesomycoplasma conjunctivae	Neutral	Normal	None	No
Moraxella cuniculi	Neutral	Normal	None	No
Muribaculum gordoncarteri	Neutral	Normal	None	No
Myroides albus	Neutral	Normal	None	No
Paenibacillus sp. FSL H8-0332	Neutral	Normal	None	No
Parabacteroides johnsonii	Neutral	Normal	None	No
Pectobacterium atrosepticum	Neutral	Normal	None	No
Pelobacter propionicus	Neutral	Normal	None	No
Pelodictyon luteolum	Neutral	Normal	None	No
Polaribacter tangerinus	Neutral	Normal	None	No
Polynucleobacter sp. JS-JIR-II-b4	Neutral	Normal	None	No
Prevotella sp. E2-28	Neutral	Normal	None	No
Rosistilla ulvae	Neutral	Normal	None	No
Sediminicola sp. YIK13	Neutral	Normal	None	No
Shenzhenvirus AhSzq1	Neutral	Normal	None	No
Shewanella mangrovisoli	Neutral	Normal	None	No
Sphaerisporangium sp. TRM90804	Neutral	Normal	None	No
Streptomyces sp. NBC_00470	Neutral	Normal	None	No
Syntrophotalea acetylenica	Neutral	Normal	None	No
Thiothrix litoralis	Neutral	Normal	None	No
Vibrio sp. THAF190c	Neutral	Normal	None	No
Wolbachia endosymbiont of Oedothorax gibbosus	Neutral	Normal	None	No
[Pantoea] beijingensis	Neutral	Normal	None	No
Alteracholeplasma palmae	Neutral	Normal	None	No
Anaerocolumna sp. AGMB13025	Neutral	Normal	None	No
Arcticibacterium luteifluviistationis	Neutral	Normal	None	No
Bacillus sp. NEB1478	Neutral	Normal	None	No
Clostridium sp. 'deep sea'	Neutral	Normal	None	No
Clostridium sp. AWRP	Neutral	Normal	None	No
Dactylococcopsis salina	Neutral	Normal	None	No
Dickeya oryzae	Neutral	Normal	None	No
Gilliamella sp. ESL0405	Neutral	Normal	None	No
Marinobacter sp. LQ44	Neutral	Normal	None	No
Methylomonas koyamae	Neutral	Normal	None	No
Natranaeroarchaeum sulfidigenes	Neutral	Normal	None	No
Natrinema salinisoli	Neutral	Normal	None	No
Photobacterium sanguinicancri	Neutral	Normal	None	No
Salegentibacter salegens	Neutral	Normal	None	No
Saliniradius amylolyticus	Neutral	Normal	None	No
Shewanella sp. FJAT-51649	Neutral	Normal	None	No
Solitalea lacus	Neutral	Normal	None	No
Tenacibaculum finnmarkense	Neutral	Normal	None	No
Thermodesulfatator indicus	Neutral	Normal	None	No
Torulaspora delbrueckii	Neutral	Normal	None	No
uncultured Amphritea sp.	Neutral	Normal	None	No
Vagococcus intermedius	Neutral	Normal	None	No
Aequorivita sp. H23M31	Neutral	Normal	None	No
Bacillus sp. ZJS3	Neutral	Normal	None	No
Candidatus Pelagibacter ubique	Neutral	Normal	None	No
Cronobacter condimenti	Neutral	Normal	None	No
Deefgea piscis	Neutral	Normal	None	No
Desulfosarcina sp. BuS5	Neutral	Normal	None	No
Entomobacter blattae	Neutral	Normal	None	No
Flavobacterium davisii	Neutral	Normal	None	No
Flavobacterium faecale	Neutral	Normal	None	No
Flavobacterium nackdongense	Neutral	Normal	None	No
Geomonas subterranea	Neutral	Normal	None	No
Halioglobus maricola	Neutral	Normal	None	No
Halomicrobium sp. LC1Hm	Neutral	Normal	None	No
Halomonas hydrothermalis	Neutral	Normal	None	No
Halomonas sp. ZZQ-149	Neutral	Normal	None	No
Halorussus aquaticus	Neutral	Normal	None	No
Haploplasma axanthum	Neutral	Normal	None	No
Kuleanavirus kuleana	Neutral	Normal	None	No
Lactiplantibacillus paraplantarum	Neutral	Normal	None	No
Limnobaculum zhutongyuii	Neutral	Normal	None	No
Marinomonas sp. CT5	Neutral	Normal	None	No
Mesomycoplasma ovipneumoniae	Neutral	Normal	None	No
Metamycoplasma cloacale	Neutral	Normal	None	No
Moraxella nasicaprae	Neutral	Normal	None	No
Moraxella nasovis	Neutral	Normal	None	No
Mycobacterium lepromatosis	Neutral	Normal	None	No
Niallia sp. Man26	Neutral	Normal	None	No
Oleidesulfovibrio alaskensis	Neutral	Normal	None	No
Paenibacillus beijingensis	Neutral	Normal	None	No
Paracrocinitomix mangrovi	Neutral	Normal	None	No
Pararhizobium sp. A13	Neutral	Normal	None	No
Parashewanella tropica	Neutral	Normal	None	No
Pigmentibacter sp. JX0631	Neutral	Normal	None	No
Rhizobium sophoriradicis	Neutral	Normal	None	No
Serpentinicella alkaliphila	Neutral	Normal	None	No
Shewanella bicestrii	Neutral	Normal	None	No
Shewanella marisflavi	Neutral	Normal	None	No
Siminovitchia sp. FSL H7-0308	Neutral	Normal	None	No
Stenotrophomonas phage vB_SM_ytsc_ply2008005c	Neutral	Normal	None	No
Synechococcus sp. PROS-9-1	Neutral	Normal	None	No
Thermus sp. WG	Neutral	Normal	None	No
Vibrio palustris	Neutral	Normal	None	No
Alphapolyomavirus quintihominis	Neutral	Normal	None	No
Alteromonas sp. RKMC-009	Neutral	Normal	None	No
Anabaenopsis elenkinii	Neutral	Normal	None	No
Arcanobacterium pinnipediorum	Neutral	Normal	None	No
Bifidobacterium sp. ESL0775	Neutral	Normal	None	No
Bremerella sp. TYQ1	Neutral	Normal	None	No
Candidatus Gullanella endobia	Neutral	Normal	None	No
Candidatus Planktophila versatilis	Neutral	Normal	None	No
Candidatus Sodalis pierantonius	Neutral	Normal	None	No
Chromobacterium haemolyticum	Neutral	Normal	None	No
Chryseobacterium sp. MA9	Neutral	Normal	None	No
Coprobacter secundus	Neutral	Normal	None	No
Deefgea tanakiae	Neutral	Normal	None	No
Desulfatibacillum aliphaticivorans	Neutral	Normal	None	No
Eggerthella sp. YY7918	Neutral	Normal	None	No
Faecalibacter sp. LW9	Neutral	Normal	None	No
Fluoribacter dumoffii	Neutral	Normal	None	No
Fluviispira sanaruensis	Neutral	Normal	None	No
Fulvivirga ligni	Neutral	Normal	None	No
Geobacter sp. SVR	Neutral	Normal	None	No
Gudongella oleilytica	Neutral	Normal	None	No
Halothermothrix orenii	Neutral	Normal	None	No
Idiomarina sp.	Neutral	Normal	None	No
Kosakonia sp. SMBL-WEM22	Neutral	Normal	None	No
Lacticaseibacillus chiayiensis	Neutral	Normal	None	No
Lacticaseibacillus pantheris	Neutral	Normal	None	No
Mammaliicoccus sp. Dog046	Neutral	Normal	None	No
Metabacillus sp. B2-18	Neutral	Normal	None	No
Methylococcus geothermalis	Neutral	Normal	None	No
Microbulbifer aggregans	Neutral	Normal	None	No
Mycoplasmopsis citelli	Neutral	Normal	None	No
Oceanimonas sp. GK1	Neutral	Normal	None	No
Paracoccus sp. (in: a-proteobacteria)	Neutral	Normal	None	No
Rickettsia felis	Neutral	Normal	None	No
Salegentibacter mishustinae	Neutral	Normal	None	No
Saprospira sp. CCB-QB6	Neutral	Normal	None	No
Solibacillus sp. FSL H8-0523	Neutral	Normal	None	No
Syntrophotalea acetylenivorans	Neutral	Normal	None	No
Thalassomonas viridans	Neutral	Normal	None	No
Thiospirochaeta perfilievii	Neutral	Normal	None	No
Alicyclobacillus sp. ALC3	Neutral	Normal	None	No
Alicyclobacillus sp. TC	Neutral	Normal	None	No
Aminipila terrae	Neutral	Normal	None	No
Anaerocolumna cellulosilytica	Neutral	Normal	None	No
Aneurinibacillus soli	Neutral	Normal	None	No
Brenneria izadpanahii	Neutral	Normal	None	No
Chitinophaga alhagiae	Neutral	Normal	None	No
Cyanidioschyzon merolae	Neutral	Normal	None	No
Dickeya poaceiphila	Neutral	Normal	None	No
Dongshaea marina	Neutral	Normal	None	No
Erysipelothrix sp. HDW6B	Neutral	Normal	None	No
Euzebyella marina	Neutral	Normal	None	No
Geminocystis herdmanii	Neutral	Normal	None	No
Halalkaliarchaeum sp. AArc-CO	Neutral	Normal	None	No
Halarcobacter ebronensis	Neutral	Normal	None	No
Halorubrum lacusprofundi	Neutral	Normal	None	No
Halothece sp. PCC 7418	Neutral	Normal	None	No
Hathewaya histolytica	Neutral	Yes	BSL-2	No
Hyphococcus flavus	Neutral	Normal	None	No
Ignavibacterium sp.	Neutral	Normal	None	No
Limosilactobacillus gastricus	Neutral	Normal	None	No
Lysinibacillus sp. FSL M8-0337	Neutral	Normal	None	No
Methylotuvimicrobium alcaliphilum	Neutral	Normal	None	No
Ornithinibacillus sp. FSL M8-0202	Neutral	Normal	None	No
Paenibacillus sp. FSL K6-1096	Neutral	Normal	None	No
Paenibacillus xylanilyticus	Neutral	Normal	None	No
Pahexavirus PA6	Neutral	Normal	None	No
Plasmodium berghei	Neutral	Normal	None	No
Spirochaeta thermophila	Neutral	Normal	None	No
Synechococcus sp. PCC 7336	Neutral	Normal	None	No
Thermococcus sp. 4557	Neutral	Normal	None	No
Venatoribacter cucullus	Neutral	Normal	None	No
Vibrio zhugei	Neutral	Normal	None	No
Acidihalobacter aeolianus	Neutral	Normal	None	No
Aeromonas sp. XH	Neutral	Normal	None	No
Alkalihalobacillus sp. LMS6	Neutral	Normal	None	No
Antarcticibacterium sp. 1MA-6-2	Neutral	Normal	None	No
Aquiluna sp. KACHI24	Neutral	Normal	None	No
Aurantibacillus circumpalustris	Neutral	Normal	None	No
Aurantimicrobium sp. INA4	Neutral	Normal	None	No
Bacillus glycinifermentans	Neutral	Normal	None	No
Campylobacter fetus	Neutral	Yes	BSL-2	No
Christiangramia echinicola	Neutral	Normal	None	No
Chryseobacterium nakagawai	Neutral	Normal	None	No
Chryseobacterium rhizoplanae	Neutral	Normal	None	No
Cryptococcus gattii	Neutral	Normal	None	No
Desulfogranum marinum	Neutral	Normal	None	No
Enterobacter sp. C2	Neutral	Normal	None	No
Fictibacillus sp. KU28468	Neutral	Normal	None	No
Flavobacterium sp. N502536	Neutral	Normal	None	No
Frateuria aurantia	Neutral	Normal	None	No
Halanaeroarchaeum sulfurireducens	Neutral	Normal	None	No
Halocatena marina	Neutral	Normal	None	No
Lachnoclostridium phytofermentans	Neutral	Normal	None	No
Lederbergia lenta	Neutral	Normal	None	No
Ligilactobacillus saerimneri	Neutral	Normal	None	No
Mycoplasma leachii	Neutral	Normal	None	No
Neptunomonas phycophila	Neutral	Normal	None	No
Nitrosomonas sp.	Neutral	Normal	None	No
Oceanobacillus sp. FSL W7-1293	Neutral	Normal	None	No
Paenibacillus sp. FSL K6-1330	Neutral	Normal	None	No
Paenibacillus sp. RC67	Neutral	Normal	None	No
Paraglaciecola sp. L3A3	Neutral	Normal	None	No
Pediococcus claussenii	Neutral	Normal	None	No
Petrimonas sp.	Neutral	Normal	None	No
Qiania dongpingensis	Neutral	Normal	None	No
Rhizobium sp. TRM96647	Neutral	Normal	None	No
Silvimonas soli	Neutral	Normal	None	No
Thermanaerovibrio velox	Neutral	Normal	None	No
Trichothermofontia sichuanensis	Neutral	Normal	None	No
Vibrio maritimus	Neutral	Normal	None	No
Virgibacillus sp. MSP4-1	Neutral	Normal	None	No
Acidithiobacillus sp. AMEEHan	Neutral	Normal	None	No
Acinetobacter sp. WCHAc010052	Neutral	Normal	None	No
Anoxybacter fermentans	Neutral	Normal	None	No
Anthocerotibacter panamensis	Neutral	Normal	None	No
Bacillus sp. THAF10	Neutral	Normal	None	No
Candidatus Rickettsiella viridis	Neutral	Normal	None	No
Carnobacterium sp. CS13	Neutral	Normal	None	No
Cedecea lapagei	Neutral	Normal	None	No
Chryseobacterium panacisoli	Neutral	Normal	None	No
Clostridium tagluense	Neutral	Normal	None	No
Drulisvirus SU503	Neutral	Normal	None	No
Ehrlichia ruminantium	Neutral	Normal	None	No
Gracilibacillus salinarum	Neutral	Normal	None	No
Halomonas sp. GD1P12	Neutral	Normal	None	No
Hirschia baltica	Neutral	Normal	None	No
Hydrocarboniclastica marina	Neutral	Normal	None	No
Kordia antarctica	Neutral	Normal	None	No
Lactiplantibacillus argentoratensis	Neutral	Normal	None	No
Lactobacillus apis	Neutral	Normal	None	No
Leptospira noguchii	Neutral	Normal	None	No
Metamycoplasma hominis	Neutral	Normal	None	No
Metasolibacillus sp. FSL K6-0083	Neutral	Normal	None	No
Neobacillus sp. PS2-9	Neutral	Normal	None	No
Oceanicoccus sagamiensis	Neutral	Normal	None	No
Paenibacillus brasilensis	Neutral	Normal	None	No
Pectobacterium colocasium	Neutral	Normal	None	No
Planococcus sp. N056	Neutral	Normal	None	No
Plasmodium vinckei	Neutral	Normal	None	No
Polaribacter sejongensis	Neutral	Normal	None	No
Rosistilla oblonga	Neutral	Normal	None	No
Slackia heliotrinireducens	Neutral	Normal	None	No
Spiribacter sp. 2438	Neutral	Normal	None	No
Streptococcus sp. DAT741	Neutral	Normal	None	No
Sulfurimonas xiamenensis	Neutral	Normal	None	No
Thermostichus lividus	Neutral	Normal	None	No
Thermus sp. CCB_US3_UF1	Neutral	Normal	None	No
Thiomicrorhabdus sp.	Neutral	Normal	None	No
Vibrio cortegadensis	Neutral	Normal	None	No
Virgibacillus phasianinus	Neutral	Normal	None	No
Acidianus brierleyi	Neutral	Normal	None	No
Amphritea japonica	Neutral	Normal	None	No
Anaerocolumna sp. MB42-C2	Neutral	Normal	None	No
Aquirhabdus parva	Neutral	Normal	None	No
Bacillus fonticola	Neutral	Normal	None	No
Bacillus luti	Neutral	Normal	None	No
Bacillus sp. FSL P4-0248	Neutral	Normal	None	No
Bartonella vinsonii	Neutral	Normal	None	No
Bruynoghevirus PaP4	Neutral	Normal	None	No
Burkholderia sp. JP2-270	Neutral	Normal	None	No
Campylobacter geochelonis	Neutral	Normal	None	No
Catenovulum adriaticum	Neutral	Normal	None	No
Costertonia aggregata	Neutral	Normal	None	No
Effusibacillus dendaii	Neutral	Normal	None	No
Enterococcus thailandicus	Neutral	Normal	None	No
Flavobacterium kingsejongi	Neutral	Normal	None	No
Flavobacterium sediminis	Neutral	Normal	None	No
Halobacillus amylolyticus	Neutral	Normal	None	No
Lacinutrix sp. Bg11-31	Neutral	Normal	None	No
Lactobacillus sp. ESL0677	Neutral	Normal	None	No
Marinifilum fragile	Neutral	Normal	None	No
Marinomonas rhizomae	Neutral	Normal	None	No
Marinomonas sp. GJ51-6	Neutral	Normal	None	No
Methylomonas sp. EFPC1	Neutral	Normal	None	No
Methylomonas sp. UP202	Neutral	Normal	None	No
Moraxella haemolytica	Neutral	Normal	None	No
Mucilaginibacter ginsenosidivorans	Neutral	Normal	None	No
Myroides sp. JBRI-B21084	Neutral	Normal	None	No
Neobacillus sp. OS1-33	Neutral	Normal	None	No
Paraliobacillus zengyii	Neutral	Normal	None	No
Paramecium tetraurelia	Neutral	Normal	None	No
Pasteurella atlantica	Neutral	Normal	None	No
Photobacterium toruni	Neutral	Normal	None	No
Polaribacter sp. ALD11	Neutral	Normal	None	No
Pseudodesulfovibrio portus	Neutral	Normal	None	No
Pseudomonas sp. MRSN 12121	Neutral	Normal	None	No
Rhodococcus jostii	Neutral	Normal	None	No
Rhodococcus sp. ZPP	Neutral	Normal	None	No
Secundilactobacillus paracollinoides	Neutral	Normal	None	No
Tichowtungia aerotolerans	Neutral	Normal	None	No
Vagococcus zengguangii	Neutral	Normal	None	No
Virgibacillus necropolis	Neutral	Normal	None	No
Virgibacillus sp. Bac330	Neutral	Normal	None	No
Winogradskyella sp. J14-2	Neutral	Normal	None	No
Acinetobacter sp. AS23	Neutral	Normal	None	No
Actinobacillus lignieresii	Neutral	Normal	None	No
Aeromonas sp. CA23	Neutral	Normal	None	No
Alkaliphilus sp. B6464	Neutral	Normal	None	No
Alteromonas gracilis	Neutral	Normal	None	No
Alteromonas stellipolaris	Neutral	Normal	None	No
Aureispira anguillae	Neutral	Normal	None	No
Bacillus swezeyi	Neutral	Normal	None	No
Bernardetia sp. ABR2-2B	Neutral	Normal	None	No
Brenneria rubrifaciens	Neutral	Normal	None	No
Brevefilum fermentans	Neutral	Normal	None	No
Candidatus Megaera polyxenophila	Neutral	Normal	None	No
Clostridium thermosuccinogenes	Neutral	Normal	None	No
Desulfitobacterium dichloroeliminans	Neutral	Normal	None	No
Desulfobacter hydrogenophilus	Neutral	Normal	None	No
Eubacterium sp. MSJ-33	Neutral	Normal	None	No
Faecalibacter bovis	Neutral	Normal	None	No
Formosa sp. Hel1_31_208	Neutral	Normal	None	No
Frischella perrara	Neutral	Normal	None	No
Fuerstiella marisgermanici	Neutral	Normal	None	No
Imperialibacter roseus	Neutral	Normal	None	No
Leminorella richardii	Neutral	Normal	None	No
Leptospira kirschneri	Neutral	Normal	None	No
Limnobaculum parvum	Neutral	Normal	None	No
Mesobacillus sp. AQ2	Neutral	Normal	None	No
Metabacillus sp. FJAT-53654	Neutral	Normal	None	No
Microbulbifer sp. SH-1	Neutral	Normal	None	No
Microbulbifer thermotolerans	Neutral	Normal	None	No
Microcystis sp. MC19	Neutral	Normal	None	No
Mucilaginibacter daejeonensis	Neutral	Normal	None	No
Mucilaginibacter sp. KACC 22063	Neutral	Normal	None	No
Parasphingorhabdus cellanae	Neutral	Normal	None	No
Pectobacterium cacticida	Neutral	Normal	None	No
Pseudanabaena galeata	Neutral	Normal	None	No
Pseudanabaena mucicola	Neutral	Normal	None	No
Rhizobium acidisoli	Neutral	Normal	None	No
Rubinisphaera brasiliensis	Neutral	Normal	None	No
Saccharolobus caldissimus	Neutral	Normal	None	No
Scottvirus scott	Neutral	Normal	None	No
secondary endosymbiont of Heteropsylla cubana	Neutral	Normal	None	No
Sodalis ligni	Neutral	Normal	None	No
Sulfurospirillum sp. 'SP'	Neutral	Normal	None	No
Tolumonas auensis	Neutral	Normal	None	No
Vescimonas fastidiosa	Neutral	Normal	None	No
Vibrio mimicus	Neutral	Yes	BSL-2	No
Alistipes senegalensis	Neutral	Normal	None	No
Arcobacter sp. FWKO B	Neutral	Normal	None	No
Butyricimonas faecihominis	Neutral	Normal	None	No
Caproiciproducens sp. CPB-2	Neutral	Normal	None	No
Citrobacter sp. B72	Neutral	Normal	None	No
Cyanobium usitatum	Neutral	Normal	None	No
Desulfovibrio ferrophilus	Neutral	Normal	None	No
Emticicia sp. 21SJ11W-3	Neutral	Normal	None	No
Ferrimonas lipolytica	Neutral	Normal	None	No
Ferruginibacter albus	Neutral	Normal	None	No
Fervidibacillus halotolerans	Neutral	Normal	None	No
Geminocystis sp. NIES-3709	Neutral	Normal	None	No
Gottschalkia acidurici	Neutral	Normal	None	No
Halobacterium salinarum	Neutral	Normal	None	No
Halococcoides cellulosivorans	Neutral	Normal	None	No
Halorussus gelatinilyticus	Neutral	Normal	None	No
Halothiobacillus neapolitanus	Neutral	Normal	None	No
Kayfunavirus Dev2	Neutral	Normal	None	No
Komagataella phaffii	Neutral	Normal	None	No
Lactobacillus terrae	Neutral	Normal	None	No
Lactobacillus ultunensis	Neutral	Normal	None	No
Leishmania panamensis	Neutral	Normal	None	No
Mammaliicoccus stepanovicii	Neutral	Normal	None	No
Maribacter dokdonensis	Neutral	Normal	None	No
Marinobacter sp. LA51	Neutral	Normal	None	No
Marinomonas arctica	Neutral	Normal	None	No
Moraxella ovis	Neutral	Normal	None	No
Mucilaginibacter ginkgonis	Neutral	Normal	None	No
Mucilaginibacter sp. CSA2-8R	Neutral	Normal	None	No
Oligella ureolytica	Neutral	Normal	None	No
Paenibacillus sp. FSL W8-0426	Neutral	Normal	None	No
Parvicella tangerina	Neutral	Normal	None	No
Polaribacter batillariae	Neutral	Normal	None	No
Pseudomonas cerasi	Neutral	Normal	None	No
Roseburia sp. 831b	Neutral	Normal	None	No
Shewanella vesiculosa	Neutral	Normal	None	No
Spiroplasma endosymbiont of Agriotes lineatus	Neutral	Normal	None	No
Sulfurimonas gotlandica	Neutral	Normal	None	No
Zymobacter palmae	Neutral	Normal	None	No
Actinobacillus delphinicola	Neutral	Normal	None	No
Anaeromicropila herbilytica	Neutral	Normal	None	No
Avibacterium sp. 21-595	Neutral	Normal	None	No
Betapapillomavirus 2	Neutral	Normal	None	No
Clostridium butyricum	Neutral	Normal	None	No
Coprococcus eutactus	Neutral	Normal	None	No
Dyella caseinilytica	Neutral	Normal	None	No
Echinicola marina	Neutral	Normal	None	No
Edaphobacter lichenicola	Neutral	Normal	None	No
Enterobacter sp. Colony194	Neutral	Normal	None	No
Ephemeroptericola cinctiostellae	Neutral	Normal	None	No
Ferrovum myxofaciens	Neutral	Normal	None	No
Flavivirga eckloniae	Neutral	Normal	None	No
Flavobacterium alkalisoli	Neutral	Normal	None	No
Francisella noatunensis	Neutral	Normal	None	No
Francisella sp. FSC1006	Neutral	Normal	None	No
Gilvimarinus sp. DA14	Neutral	Normal	None	No
Helicobacter mastomyrinus	Neutral	Normal	None	No
Labrenzia sp. THAF82	Neutral	Normal	None	No
Lentibacillus amyloliquefaciens	Neutral	Normal	None	No
Lysinibacillus sp. 2017	Neutral	Normal	None	No
Methanobacterium formicicum	Neutral	Normal	None	No
Natrinema caseinilyticum	Neutral	Normal	None	No
Neobacillus sp. PS3-34	Neutral	Normal	None	No
Paenibacillus sp. FSL H8-0548	Neutral	Normal	None	No
Paenibacillus sp. PAMC21692	Neutral	Normal	None	No
Pahexavirus P144	Neutral	Normal	None	No
Parvularcula bermudensis	Neutral	Normal	None	No
Photobacterium sp. DA100	Neutral	Normal	None	No
Polynucleobacter asymbioticus	Neutral	Normal	None	No
Psychroserpens ponticola	Neutral	Normal	None	No
Rhizobium sp. L51/94	Neutral	Normal	None	No
Salarchaeum japonicum	Neutral	Normal	None	No
Serratia sp. JSRIV004	Neutral	Normal	None	No
Shewanella frigidimarina	Neutral	Normal	None	No
Sutterella faecalis	Neutral	Normal	None	No
Thalassiosira pseudonana	Neutral	Normal	None	No
Theileria orientalis	Neutral	Normal	None	No
uncultured Methanolobus sp.	Neutral	Normal	None	No
Vibrio owensii	Neutral	Normal	None	No
Apilactobacillus kunkeei	Neutral	Normal	None	No
Capnocytophaga sp. H2931	Neutral	Normal	None	No
Chryseobacterium salivictor	Neutral	Normal	None	No
Clostridium scatologenes	Neutral	Normal	None	No
Desulfosarcina widdelii	Neutral	Normal	None	No
Emticicia oligotrophica	Neutral	Normal	None	No
Flavobacterium sangjuense	Neutral	Normal	None	No
Fulvivirga maritima	Neutral	Normal	None	No
Gloeothece verrucosa	Neutral	Normal	None	No
Halobacterium zhouii	Neutral	Normal	None	No
Halobellus ramosii	Neutral	Normal	None	No
Haloglomus salinum	Neutral	Normal	None	No
Halorubrum sp. DM2	Neutral	Normal	None	No
Kosakonia arachidis	Neutral	Normal	None	No
Metamycoplasma orale	Neutral	Normal	None	No
Paenibacillus aurantius	Neutral	Normal	None	No
Pahexavirus PHL308M00	Neutral	Normal	None	No
Paludibacter propionicigenes	Neutral	Normal	None	No
Salinibacterium sp. M195	Neutral	Normal	None	No
Sulfitobacter sp. W002	Neutral	Normal	None	No
Tritonibacter sp. AK171	Neutral	Normal	None	No
Achromobacter sp. B7	Neutral	Normal	None	No
Bacillus sp. DX3.1	Neutral	Normal	None	No
Buttiauxella sp. 3AFRM03	Neutral	Normal	None	No
Candidatus Karelsulcia muelleri	Neutral	Normal	None	No
Candidatus Methylospira mobilis	Neutral	Normal	None	No
Citrobacter cronae	Neutral	Normal	None	No
Clostridium sp. JN-9	Neutral	Normal	None	No
Cytobacillus pseudoceanisediminis	Neutral	Normal	None	No
Dehalobacter sp. DCM	Neutral	Normal	None	No
Desulfocurvibacter africanus	Neutral	Normal	None	No
Falsihalocynthiibacter arcticus	Neutral	Normal	None	No
Gimesia panareensis	Neutral	Normal	None	No
Hafnia paralvei	Neutral	Normal	None	No
Haloprofundus salinisoli	Neutral	Normal	None	No
Koleobacter methoxysyntrophicus	Neutral	Normal	None	No
Kroppenstedtia pulmonis	Neutral	Normal	None	No
Lactobacillus acidophilus	Neutral	Yes	BSL-1	No
Lactobacillus sp. CBA3606	Neutral	Normal	None	No
Legionella clemsonensis	Neutral	Normal	None	No
Marinilongibacter aquaticus	Neutral	Normal	None	No
Mesotoga prima	Neutral	Normal	None	No
Microbulbifer bruguierae	Neutral	Normal	None	No
Obolenskvirus AbC62	Neutral	Normal	None	No
Otariodibacter oris	Neutral	Normal	None	No
Paracoccus methylutens	Neutral	Normal	None	No
Pseudoalteromonas flavipulchra	Neutral	Normal	None	No
Pseudomonas anuradhapurensis	Neutral	Normal	None	No
Shewanella sp. WE21	Neutral	Normal	None	No
Streptomyces sp. NBC_00998	Neutral	Normal	None	No
Sutcliffiella horikoshii	Neutral	Normal	None	No
Synechococcus sp. CBW1108	Neutral	Normal	None	No
Telmatocola sphagniphila	Neutral	Normal	None	No
Tetragenococcus koreensis	Neutral	Normal	None	No
Aureispira sp. CCB-E	Neutral	Normal	None	No
Bacillus nitratireducens	Neutral	Normal	None	No
Candidatus Velamenicoccus archaeovorus	Neutral	Normal	None	No
Desulfopila sp. IMCC35008	Neutral	Normal	None	No
Erwinia sorbitola	Neutral	Normal	None	No
Flavobacterium agricola	Neutral	Normal	None	No
Hahella chejuensis	Neutral	Normal	None	No
Haladaptatus pallidirubidus	Neutral	Normal	None	No
Halarcobacter sp.	Neutral	Normal	None	No
Lactobacillus panisapium	Neutral	Normal	None	No
Lysinibacillus sp. FSL K6-3209	Neutral	Normal	None	No
Marinobacter sp. es.042	Neutral	Normal	None	No
Mycoplasma capricolum	Neutral	Normal	None	No
Natrialba magadii	Neutral	Normal	None	No
Pectobacterium quasiaquaticum	Neutral	Normal	None	No
Plasmodium coatneyi	Neutral	Normal	None	No
Plesiomonas shigelloides	Neutral	Yes	BSL-2	No
Pontibacter sp. SGAir0037	Neutral	Normal	None	No
Porifericola rhodea	Neutral	Normal	None	No
Rhizobium croatiense	Neutral	Normal	None	No
Rickettsia asembonensis	Neutral	Normal	None	No
Saccharospirillum mangrovi	Neutral	Normal	None	No
Sphingobacterium hotanense	Neutral	Normal	None	No
Sphingomonas sp. ERG5	Neutral	Normal	None	No
Streptococcus chenjunshii	Neutral	Normal	None	No
Thermus phage phiYS40	Neutral	Normal	None	No
Thiothrix winogradskyi	Neutral	Normal	None	No
Ureaplasma urealyticum	Neutral	Normal	None	No
Abaiavirus POA1180	Neutral	Normal	None	No
Acidaminococcus fermentans	Neutral	Normal	None	No
Acidithiobacillus thiooxidans	Neutral	Normal	None	No
Aminipila butyrica	Neutral	Normal	None	No
Bizionia sp. M204	Neutral	Normal	None	No
Brachyspira intermedia	Neutral	Normal	None	No
Chloroflexus aurantiacus	Neutral	Normal	None	No
Elizabethkingia ursingii	Neutral	Normal	None	No
Flaviramulus sp. BrNp1-15	Neutral	Normal	None	No
Flavobacterium eburneipallidum	Neutral	Normal	None	No
Fusobacterium gonidiaformans	Neutral	Normal	None	No
Haloprofundus halobius	Neutral	Normal	None	No
Magnetococcus marinus	Neutral	Normal	None	No
Microbacterium phage Footloose	Neutral	Normal	None	No
Moraxella canis	Neutral	Normal	None	No
Neobacillus sp. FSL H8-0543	Neutral	Normal	None	No
Polynucleobacter necessarius	Neutral	Normal	None	No
Pseudocitrobacter corydidari	Neutral	Normal	None	No
Pseudovibrio brasiliensis	Neutral	Normal	None	No
Rhizobium brockwellii	Neutral	Normal	None	No
Salidesulfovibrio onnuriiensis	Neutral	Normal	None	No
Sonalivirus sonali	Neutral	Normal	None	No
Tetrapisispora blattae	Neutral	Normal	None	No
Thalassospira lucentensis	Neutral	Normal	None	No
Vibrio sp. SCSIO 43137	Neutral	Normal	None	No
Actinobacillus genomosp. 2	Neutral	Normal	None	No
Aliivibrio fischeri	Neutral	Normal	None	No
Apibacter raozihei	Neutral	Normal	None	No
Aquicella siphonis	Neutral	Normal	None	No
Bacillus sp. DTU_2020_1000418_1_SI_GHA_SEK_038	Neutral	Normal	None	No
Bacillus wiedmannii	Neutral	Normal	None	No
Candidatus Gromoviella agglomerans	Neutral	Normal	None	No
Desulforamulus ferrireducens	Neutral	Normal	None	No
Hyphomonas atlantica	Neutral	Normal	None	No
Idiomarina sp. X4	Neutral	Normal	None	No
Lacticaseibacillus pabuli	Neutral	Normal	None	No
Mieseafarmvirus RSL1	Neutral	Normal	None	No
Neisseria sp. 51.81	Neutral	Normal	None	No
Oenococcus sicerae	Neutral	Normal	None	No
Paenibacillus durus	Neutral	Normal	None	No
Paenibacillus sonchi	Neutral	Normal	None	No
Paenibacillus sp. FSL R10-2734	Neutral	Normal	None	No
Paenibacillus sp. FSL R5-0341	Neutral	Normal	None	No
Paenibacillus sp. FSL R7-0216	Neutral	Normal	None	No
Parasphingorhabdus halotolerans	Neutral	Normal	None	No
Synechococcus sp. JA-3-3Ab	Neutral	Normal	None	No
Thioclava sp. GXIMD4215	Neutral	Normal	None	No
Wolbachia endosymbiont of Trichogramma pretiosum	Neutral	Normal	None	No
Bartonella taylorii	Neutral	Normal	None	No
Cellulophaga lytica	Neutral	Normal	None	No
Chordicoccus furentiruminis	Neutral	Normal	None	No
Cyanobium sp. NS01	Neutral	Normal	None	No
Enterobacter sp. JUb54	Neutral	Normal	None	No
Flavobacterium sp. N502540	Neutral	Normal	None	No
Gimesia maris	Neutral	Normal	None	No
Listeria ivanovii	Neutral	Yes	BSL-2	No
Melissococcus plutonius	Neutral	Normal	None	No
Microbulbifer agarilyticus	Neutral	Normal	None	No
Myxococcus sp. MxC21-1	Neutral	Normal	None	No
Natrinema marinum	Neutral	Normal	None	No
Neobacillus mesonae	Neutral	Normal	None	No
Paenibacillus albus	Neutral	Normal	None	No
Paenibacillus psychroresistens	Neutral	Normal	None	No
Parasphingorhabdus litoris	Neutral	Normal	None	No
Phototrophicus methaneseepsis	Neutral	Normal	None	No
Pseudomonas sp. XWY-1	Neutral	Normal	None	No
Rhodanobacter sp. AS-Z3	Neutral	Normal	None	No
Ruficoccus sp. ZRK36	Neutral	Normal	None	No
Sebaldella termitidis	Neutral	Normal	None	No
Streptomyces sp. FR1	Neutral	Normal	None	No
Thermoanaerobacterium xylanolyticum	Neutral	Normal	None	No
Trichlorobacter ammonificans	Neutral	Normal	None	No
Vibrio anguillarum	Neutral	Normal	None	No
Xenorhabdus bovienii	Neutral	Normal	None	No
Agathobaculum sp. NTUH-O15-33	Neutral	Normal	None	No
Alicyclobacillus acidoterrestris	Neutral	Normal	None	No
Bdellovibrio sp. ZAP7	Neutral	Normal	None	No
Cohnella cholangitidis	Neutral	Normal	None	No
Collinsella sp. zg1085	Neutral	Normal	None	No
Crassaminicella profunda	Neutral	Normal	None	No
Dolichospermum heterosporum	Neutral	Normal	None	No
Flammeovirga kamogawensis	Neutral	Normal	None	No
Flavobacterium azooxidireducens	Neutral	Normal	None	No
Glaesserella sp. 15-184	Neutral	Normal	None	No
Halobaculum sp. DT55	Neutral	Normal	None	No
Marinobacterium sediminicola	Neutral	Normal	None	No
Natronorubrum aibiense	Neutral	Normal	None	No
Neobacillus sp. 114	Neutral	Normal	None	No
Nonlabens ulvanivorans	Neutral	Normal	None	No
Ostreococcus sp. 'lucimarinus'	Neutral	Normal	None	No
Paenibacillus sp. JNUCC-31	Neutral	Normal	None	No
Paenibacillus sp. URB8-2	Neutral	Normal	None	No
Paenibacillus tianjinensis	Neutral	Normal	None	No
Ruminococcus albus	Neutral	Normal	None	No
Salarchaeum sp. JOR-1	Neutral	Normal	None	No
Salinivibrio kushneri	Neutral	Normal	None	No
Spiroplasma endosymbiont of Nebria brevicollis	Neutral	Normal	None	No
Spongiibacter sp. IMCC21906	Neutral	Normal	None	No
uncultured Mailhella sp.	Neutral	Normal	None	No
Arachidicoccus soli	Neutral	Normal	None	No
Arcobacter aquimarinus	Neutral	Normal	None	No
Bacterioplanes sanyensis	Neutral	Normal	None	No
Campylobacter sp. RM16192	Neutral	Normal	None	No
Candidatus Nitrospira allomarina	Neutral	Normal	None	No
Chlorobaculum limnaeum	Neutral	Normal	None	No
Citrobacter sp. BDA59-3	Neutral	Normal	None	No
Clostridium acetobutylicum	Neutral	Normal	None	No
Gelria sp. Kuro-4	Neutral	Normal	None	No
Halorubrum salinarum	Neutral	Normal	None	No
Idiomarina sp. PL1-037	Neutral	Normal	None	No
Malaciobacter mytili	Neutral	Normal	None	No
Methanofollis formosanus	Neutral	Normal	None	No
Mucilaginibacter sabulilitoris	Neutral	Normal	None	No
Nitratidesulfovibrio vulgaris	Neutral	Normal	None	No
Nostoc sp. GT001	Neutral	Normal	None	No
Paenibacillus stellifer	Neutral	Normal	None	No
Pahexavirus PAD20	Neutral	Normal	None	No
Pahexavirus PHL060L00	Neutral	Normal	None	No
Romboutsia hominis	Neutral	Normal	None	No
Sodalis praecaptivus	Neutral	Normal	None	No
Streptomyces sp. CFMR 7	Neutral	Normal	None	No
Thiomicrospira sp. R3	Neutral	Normal	None	No
Acidisarcina polymorpha	Neutral	Normal	None	No
Acinetobacter equi	Neutral	Normal	None	No
Aerococcus sanguinicola	Neutral	Normal	None	No
Alkalicella caledoniensis	Neutral	Normal	None	No
Arthrobacter sp. J3.49	Neutral	Normal	None	No
Burkholderia orbicola	Neutral	Normal	None	No
Campylobacter sp. RM16187	Neutral	Normal	None	No
Cellulophaga algicola	Neutral	Normal	None	No
Chlorobium phaeovibrioides	Neutral	Normal	None	No
Clostridium cellulovorans	Neutral	Normal	None	No
Companilactobacillus farciminis	Neutral	Normal	None	No
Desulfitobacterium dehalogenans	Neutral	Normal	None	No
Desulfurivibrio alkaliphilus	Neutral	Normal	None	No
Drulisvirus SU552A	Neutral	Normal	None	No
Enterococcus gilvus	Neutral	Normal	None	No
Geobacter pickeringii	Neutral	Normal	None	No
Halomonas sp. I5-271120	Neutral	Normal	None	No
Jeotgalibaca dankookensis	Neutral	Normal	None	No
Kayfunavirus Ro45lw	Neutral	Normal	None	No
Kordiimonas sp. SCSIO 12610	Neutral	Normal	None	No
Leptospira biflexa	Neutral	Normal	None	No
Megasphaera massiliensis	Neutral	Normal	None	No
Mesobacillus sp. S13	Neutral	Normal	None	No
Neobacillus sp. OS1-32	Neutral	Normal	None	No
Saprospira grandis	Neutral	Normal	None	No
uncultured Dethiosulfovibrio sp.	Neutral	Normal	None	No
Vibrio nigripulchritudo	Neutral	Normal	None	No
Altererythrobacter sp. ZODW24	Neutral	Normal	None	No
Alteromonas sp. M12	Neutral	Normal	None	No
Arcobacter roscoffensis	Neutral	Normal	None	No
Blastopirellula sp. J2-11	Neutral	Normal	None	No
Borrelia miyamotoi	Neutral	Normal	None	No
Campylobacter pinnipediorum	Neutral	Normal	None	No
Candidatus Liberibacter asiaticus	Neutral	Normal	None	No
Chitinophaga sp. HK235	Neutral	Normal	None	No
Enterococcus sp. 7F3_DIV0205	Neutral	Normal	None	No
Ereboglobus luteus	Neutral	Normal	None	No
Flavobacterium album	Above	Normal	None	No
Geobacter metallireducens	Neutral	Normal	None	No
Halobellus limi	Neutral	Normal	None	No
Heliomicrobium modesticaldum	Neutral	Normal	None	No
Leadbetterella byssophila	Neutral	Normal	None	No
Mangrovibacillus cuniculi	Neutral	Normal	None	No
Mangrovivirga cuniculi	Neutral	Normal	None	No
Marinobacter similis	Neutral	Normal	None	No
Mesorhizobium sp. ISC15	Neutral	Normal	None	No
Microbacterium sp. AISO3	Neutral	Normal	None	No
Mucilaginibacter celer	Neutral	Normal	None	No
Mucilaginibacter sp. 14171R-50	Neutral	Normal	None	No
Musicola paradisiaca	Neutral	Normal	None	No
Neptuniibacter halophilus	Neutral	Normal	None	No
Pseudodesulfovibrio sediminis	Neutral	Normal	None	No
Rheinheimera sp. MMS21-TC3	Above	Normal	None	No
Salvovirus bacata	Neutral	Normal	None	No
Shewanella decolorationis	Neutral	Normal	None	No
Shewanella loihica	Neutral	Normal	None	No
Trabulsiella odontotermitis	Neutral	Normal	None	No
Acetobacter ascendens	Neutral	Normal	None	No
Bifidobacterium catenulatum	Neutral	Normal	None	No
Brevibacillus ruminantium	Neutral	Normal	None	No
Butyrivibrio crossotus	Neutral	Normal	None	No
Clostridium aceticum	Neutral	Normal	None	No
Evansella sp. LMS18	Neutral	Normal	None	No
Ferriphaselus amnicola	Neutral	Normal	None	No
Flavobacterium okayamense	Neutral	Normal	None	No
Francisella sp. LA112445	Neutral	Normal	None	No
Halorussus lipolyticus	Neutral	Normal	None	No
Haloterrigena sp. KLK7	Neutral	Normal	None	No
Kayfunavirus SH4	Neutral	Normal	None	No
Ketobacter alkanivorans	Neutral	Normal	None	No
Lacticaseibacillus manihotivorans	Neutral	Normal	None	No
Lactococcus sp. LG606	Neutral	Normal	None	No
Marinithermus hydrothermalis	Neutral	Normal	None	No
Moineauvirus CHPC1041	Neutral	Normal	None	No
Natrinema longum	Neutral	Normal	None	No
Nitrosococcus wardiae	Neutral	Normal	None	No
Paenisporosarcina sp. FSL H8-0542	Neutral	Normal	None	No
Pahexavirus PHL132N00	Neutral	Normal	None	No
Pantoea alhagi	Neutral	Normal	None	No
Prevotella sp. E13-17	Neutral	Normal	None	No
Rubripirellula lacrimiformis	Neutral	Normal	None	No
Rufibacter sp. DG15C	Neutral	Normal	None	No
Salinarchaeum laminariae	Neutral	Normal	None	No
Shandongvirus H101	Neutral	Normal	None	No
Streptobacillus moniliformis	Neutral	Yes	BSL-2	No
Sulfurimonas sp. HSL-3221	Neutral	Normal	None	No
Sulfurisphaera tokodaii	Neutral	Normal	None	No
Synechococcus sp. A15-44	Neutral	Normal	None	No
Syntrophotalea carbinolica	Neutral	Normal	None	No
Thiosocius teredinicola	Above	Normal	None	No
Xanthomonas axonopodis	Neutral	Normal	None	No
Advenella mimigardefordensis	Neutral	Normal	None	No
Arcanobacterium phocae	Neutral	Normal	None	No
Chlorobium limicola	Neutral	Normal	None	No
Coriobacterium glomerans	Neutral	Normal	None	No
Desulfuromonas sp. AOP6	Neutral	Normal	None	No
Dissulfurimicrobium hydrothermale	Neutral	Normal	None	No
Gloeothece citriformis	Neutral	Normal	None	No
Kitasatospora sp. NBC_01250	Neutral	Normal	None	No
Maliibacterium massiliense	Neutral	Normal	None	No
Mucilaginibacter mali	Neutral	Normal	None	No
Mycoplasmopsis fermentans	Neutral	Normal	None	No
Nonlabens sp. Hel1_33_55	Neutral	Normal	None	No
Pahexavirus mrAK	Neutral	Normal	None	No
Plasmodium sp. gorilla clade G2	Neutral	Normal	None	No
Pontibacillus sp. ALD_SL1	Neutral	Normal	None	No
Pseudothermotoga hypogea	Neutral	Normal	None	No
Rhizosphaericola mali	Neutral	Normal	None	No
Rhodopirellula sp. P2	Neutral	Normal	None	No
Rickettsiella endosymbiont of Miltochrista miniata	Neutral	Normal	None	No
Rippkaea orientalis	Neutral	Normal	None	No
Shewanella sp. ANA-3	Neutral	Normal	None	No
Shimwellia blattae	Neutral	Normal	None	No
Sporosarcina sp. Marseille-Q4063	Neutral	Normal	None	No
Sulfitobacter sp. OXR-159	Neutral	Normal	None	No
Sulfuriferula nivalis	Neutral	Normal	None	No
Synechococcus sp. SynAce01	Neutral	Normal	None	No
Azohydromonas lata	Neutral	Normal	None	No
Burkholderia sp. NRF60-BP8	Neutral	Normal	None	No
Burkholderia sp. PAMC 26561	Neutral	Normal	None	No
Clostridium chauvoei	Neutral	Normal	None	No
Flavobacterium sp. LPB0248	Neutral	Normal	None	No
Haloarcula halobia	Neutral	Normal	None	No
Haloarcula ordinaria	Neutral	Normal	None	No
Legionella longbeachae	Neutral	Yes	BSL-2	No
Marinobacter sp. M3C	Neutral	Normal	None	No
Methylophilus medardicus	Neutral	Normal	None	No
Methylovulum psychrotolerans	Neutral	Normal	None	No
Monoglobus pectinilyticus	Neutral	Normal	None	No
Obolenskvirus WCHABP12	Neutral	Normal	None	No
Paenibacillus antarcticus	Neutral	Normal	None	No
Paenibacillus baekrokdamisoli	Neutral	Normal	None	No
Plasmodium vivax	Neutral	Normal	None	No
Rickettsia endosymbiont of Polydrusus tereticollis	Neutral	Normal	None	No
Rickettsia sp. MEAM1 (Bemisia tabaci)	Neutral	Normal	None	No
Runella slithyformis	Neutral	Normal	None	No
Sphaerochaeta pleomorpha	Neutral	Normal	None	No
Sphaerospermopsis torques-reginae	Neutral	Normal	None	No
Sphingomonas sp. JE1	Neutral	Normal	None	No
Sporosarcina sp. 0.2-SM1T-5	Neutral	Normal	None	No
uncultured Methanospirillum sp.	Neutral	Normal	None	No
uncultured Sphaerochaeta sp.	Neutral	Normal	None	No
Vibrio atlanticus	Neutral	Normal	None	No
Vibrio sp. J383	Neutral	Normal	None	No
Achromobacter sp. LM16	Neutral	Normal	None	No
Amphibacillus xylanus	Neutral	Normal	None	No
Bathycoccus prasinos	Above	Normal	None	No
Brachyspira pilosicoli	Neutral	Normal	None	No
Caloranaerobacter azorensis	Neutral	Normal	None	No
Chryseobacterium sp. T16E-39	Neutral	Normal	None	No
Companilactobacillus heilongjiangensis	Neutral	Normal	None	No
Companilactobacillus pabuli	Neutral	Normal	None	No
Enterobacter sp. SGAir0187	Neutral	Normal	None	No
Flavobacterium aestivum	Neutral	Normal	None	No
Flavobacterium marginilacus	Neutral	Normal	None	No
Geoalkalibacter subterraneus	Neutral	Normal	None	No
Kangiella geojedonensis	Neutral	Normal	None	No
Kineobactrum salinum	Neutral	Normal	None	No
Lactococcus allomyrinae	Neutral	Normal	None	No
Leucobacter denitrificans	Neutral	Normal	None	No
Metrivirus ME3	Neutral	Normal	None	No
Muribaculum intestinale	Neutral	Normal	None	No
Natronorubrum bangense	Neutral	Normal	None	No
Nitrosopumilus ureiphilus	Neutral	Normal	None	No
Parasaccharibacter sp. TMW 2.1888	Neutral	Normal	None	No
Shewanella algae	Neutral	Normal	None	No
Sporosarcina sp. B2O-1	Neutral	Normal	None	No
Stenotrophomonas phage vB_Sm_QDWS359	Neutral	Normal	None	No
Streptomyces bobili	Neutral	Normal	None	No
Streptomyces sp. MBT27	Neutral	Normal	None	No
Streptomyces sp. WAC00303	Neutral	Normal	None	No
Trichlorobacter lovleyi	Neutral	Normal	None	No
uncultured Sunxiuqinia sp.	Neutral	Normal	None	No
Undibacterium parvum	Neutral	Normal	None	No
Ureibacillus sp. FSL W7-1570	Neutral	Normal	None	No
Winslowiella toletana	Neutral	Normal	None	No
Acidihalobacter yilgarnensis	Neutral	Normal	None	No
Algoriphagus sanaruensis	Neutral	Normal	None	No
Alistipes indistinctus	Neutral	Normal	None	No
Anaerobacillus isosaccharinicus	Neutral	Normal	None	No
Arthrobacter sp. StoSoilB13	Neutral	Normal	None	No
Burkholderia sp. MSMB1588	Neutral	Normal	None	No
Desulfosediminicola ganghwensis	Neutral	Normal	None	No
Endozoicomonas montiporae	Neutral	Normal	None	No
Kayfunavirus EcpYZU01	Neutral	Normal	None	No
Ligilactobacillus acidipiscis	Neutral	Normal	None	No
Lysinibacillus macroides	Neutral	Normal	None	No
Lysinibacillus sp. SGAir0095	Neutral	Normal	None	No
Megasphaera stantonii	Neutral	Normal	None	No
Methylophaga frappieri	Neutral	Normal	None	No
Mucilaginibacter robiniae	Neutral	Normal	None	No
Nosocomiicoccus massiliensis	Neutral	Normal	None	No
Pahexavirus attacne	Neutral	Normal	None	No
Plasmodium gaboni	Neutral	Normal	None	No
Salinarchaeum sp. Harcht-Bsk1	Neutral	Normal	None	No
Salinivirga cyanobacteriivorans	Neutral	Normal	None	No
Xiashengella succiniciproducens	Neutral	Normal	None	No
Acinetobacter sp. YH12138	Neutral	Normal	None	No
Aeribacillus sp. FSL W8-0870	Neutral	Normal	None	No
Agarivorans gilvus	Neutral	Normal	None	No
Aquiluna borgnonia	Neutral	Normal	None	No
Bifidobacterium eulemuris	Neutral	Normal	None	No
Bradyrhizobium sp. LCT2	Neutral	Normal	None	No
Enterobacter quasiroggenkampii	Neutral	Yes	BSL-2	No
Erysipelothrix inopinata	Neutral	Normal	None	No
Flavobacterium oreochromis	Neutral	Normal	None	No
Geobacter benzoatilyticus	Neutral	Normal	None	No
Halalkalibacter krulwichiae	Neutral	Normal	None	No
Kineothrix sp. IPX-CK	Neutral	Normal	None	No
Kosakonia sp. BYX6	Neutral	Normal	None	No
Limosilactobacillus mucosae	Neutral	Normal	None	No
Maribacter sp. HTCC2170	Neutral	Normal	None	No
Metabacillus sp. KUDC1714	Neutral	Normal	None	No
Methanothrix sp.	Neutral	Normal	None	No
Natrarchaeobaculum sulfurireducens	Neutral	Normal	None	No
Oxalobacter aliiformigenes	Neutral	Normal	None	No
Parabacteroides chongii	Neutral	Normal	None	No
Paraphotobacterium marinum	Neutral	Normal	None	No
Phaeobacter sp. LSS9	Neutral	Normal	None	No
Photobacterium sp. TLY01	Neutral	Normal	None	No
Pseudonocardia alaniniphila	Neutral	Normal	None	No
Sedimenticola thiotaurini	Neutral	Normal	None	No
Snodgrassella alvi	Neutral	Normal	None	No
Solidesulfovibrio magneticus	Neutral	Normal	None	No
Sugiyamaella lignohabitans	Neutral	Normal	None	No
Thiohalobacter thiocyanaticus	Neutral	Normal	None	No
Yersinia frederiksenii	Neutral	Yes	BSL-2	No
[Enterobacter] lignolyticus	Neutral	Normal	None	No
Acinetobacter oleivorans	Neutral	Normal	None	No
Aeribacillus composti	Neutral	Normal	None	No
Alysiella crassa	Neutral	Normal	None	No
Bacteroides sp. CACC 737	Neutral	Normal	None	No
Brevibacillus marinus	Neutral	Normal	None	No
Burkholderia sp. KBS0801	Neutral	Normal	None	No
Calothrix sp. NIES-3974	Neutral	Normal	None	No
Candidatus Portiera aleyrodidarum	Neutral	Normal	None	No
Candidatus Prometheoarchaeum syntrophicum	Neutral	Normal	None	No
Eremothecium sinecaudum	Neutral	Normal	None	No
Halomonas binhaiensis	Neutral	Normal	None	No
Levilactobacillus suantsaii	Neutral	Normal	None	No
Marinobacter sp. LV10R510-11A	Neutral	Normal	None	No
Methylomonas rhizoryzae	Neutral	Normal	None	No
Prevotella sp. E9-3	Neutral	Normal	None	No
Pseudomonas sp. K-62	Neutral	Normal	None	No
Pseudomonas sp. ML2-2023-6	Neutral	Normal	None	No
Saccharophagus degradans	Neutral	Normal	None	No
Tunicatimonas pelagia	Neutral	Normal	None	No
uncultured Acetobacteroides sp.	Neutral	Normal	None	No
Xylanibacter ruminicola	Neutral	Normal	None	No
Acinetobacter lanii	Neutral	Normal	None	No
Acinetobacter sp. ESL0695	Neutral	Normal	None	No
Alicyclobacillus fastidiosus	Neutral	Normal	None	No
Candidatus Nitrosocosmicus hydrocola	Neutral	Normal	None	No
Clostridium saccharobutylicum	Neutral	Normal	None	No
Coraliomargarita algicola	Neutral	Normal	None	No
Flavobacterium sp. K5-23	Neutral	Normal	None	No
Kushneria marisflavi	Neutral	Normal	None	No
Leptothermofonsia sichuanensis	Neutral	Normal	None	No
Marinobacter sp. JH2	Neutral	Normal	None	No
Megamonas hypermegale	Neutral	Normal	None	No
Methylotenera mobilis	Neutral	Normal	None	No
Methylovorus glucosotrophus	Neutral	Normal	None	No
Moraxella sp. ZY210820	Neutral	Normal	None	No
Natrinema sp. J7-2	Neutral	Normal	None	No
Nitratireductor sp. GZWM139	Neutral	Normal	None	No
Paenibacillus amylolyticus	Neutral	Normal	None	No
Pandoravirus salinus	Neutral	Normal	None	No
Polaribacter atrinae	Neutral	Normal	None	No
Sideroxydans lithotrophicus	Neutral	Normal	None	No
Synechococcus sp. RS9909	Neutral	Normal	None	No
Terriglobus albidus	Neutral	Normal	None	No
Thermophilibacter immobilis	Above	Normal	None	No
Vibrio rumoiensis	Neutral	Normal	None	No
Yersinia mollaretii	Neutral	Normal	None	No
Acinetobacter wanghuae	Neutral	Normal	None	No
Aeromonas enteropelogenes	Neutral	Normal	None	No
Akkermansia sp. N21116	Neutral	Normal	None	No
Catenibacterium mitsuokai	Neutral	Normal	None	No
Cyanobacterium aponinum	Neutral	Normal	None	No
Desulfuromonas sp. DDH964	Neutral	Normal	None	No
Flavobacterium psychrophilum	Neutral	Normal	None	No
Gallionella capsiferriformans	Neutral	Normal	None	No
Gimesia algae	Neutral	Normal	None	No
Halioglobus japonicus	Neutral	Normal	None	No
Halorubrum ezzemoulense	Neutral	Normal	None	No
Halorussus limi	Neutral	Normal	None	No
Litorivicinus lipolyticus	Neutral	Normal	None	No
Moorella sp. Hama-1	Neutral	Normal	None	No
Mucilaginibacter sp. KACC 22773	Neutral	Normal	None	No
Niabella ginsenosidivorans	Neutral	Normal	None	No
Oecophyllibacter saccharovorans	Neutral	Normal	None	No
Paenibacillus sp. BIC5C1	Neutral	Normal	None	No
Parafannyhessea umbonata	Neutral	Normal	None	No
Paraprevotella xylaniphila	Neutral	Normal	None	No
Parasphingopyxis sp. CP4	Neutral	Normal	None	No
Pasteurella skyensis	Neutral	Normal	None	No
Peribacillus psychrosaccharolyticus	Neutral	Normal	None	No
Rickettsia bellii	Neutral	Normal	None	No
Robiginitalea biformata	Neutral	Normal	None	No
Serratia sp. P2ACOL2	Neutral	Normal	None	No
Sphingobacterium sp. UGAL515B_05	Neutral	Normal	None	No
Spongiibacter taiwanensis	Neutral	Normal	None	No
Treponema succinifaciens	Neutral	Normal	None	No
Trichocoleus desertorum	Neutral	Normal	None	No
Vreelandella profundi	Neutral	Normal	None	No
Aequorivita sublithincola	Neutral	Normal	None	No
Candidatus Nanopelagicus limnes	Neutral	Normal	None	No
Catalinimonas niigatensis	Neutral	Normal	None	No
Cupriavidus sp. USMAHM13	Neutral	Normal	None	No
Domibacillus sp. DTU_2020_1001157_1_SI_ALB_TIR_016	Neutral	Normal	None	No
Erwinia sp. HDF1-3R	Neutral	Normal	None	No
Flavobacterium sp. CECT 9288	Neutral	Normal	None	No
Fusobacterium hominis	Neutral	Normal	None	No
Gemella sp. oral taxon 928	Neutral	Normal	None	No
Haloplanus aerogenes	Neutral	Normal	None	No
Halorubrum sp. CBA1229	Neutral	Normal	None	No
Halorussus caseinilyticus	Neutral	Normal	None	No
Luteolibacter ambystomatis	Neutral	Normal	None	No
Lysinibacillus sp. 1 U-2021	Neutral	Normal	None	No
Natrinema thermotolerans	Neutral	Normal	None	No
Paenibacillus crassostreae	Neutral	Normal	None	No
Paenibacillus sp. D2_2	Neutral	Normal	None	No
Paracoccus haeundaensis	Neutral	Normal	None	No
Pararhizobium sp. IMCC21322	Neutral	Normal	None	No
Polaribacter sp. KT25b	Neutral	Normal	None	No
Saccharomycodes ludwigii	Neutral	Normal	None	No
Thermoanaerobacterium sp. CMT5567-10	Neutral	Normal	None	No
Thermomicrobium roseum	Neutral	Normal	None	No
Thiomicrorhabdus sediminis	Neutral	Normal	None	No
Tumebacillus avium	Neutral	Normal	None	No
Vibrio alginolyticus	Neutral	Yes	BSL-2	No
Vibrio sp. STUT-A16	Neutral	Normal	None	No
Acetobacter ghanensis	Neutral	Normal	None	No
Alkalihalobacillus sp. AL-G	Neutral	Normal	None	No
Burkholderia oklahomensis	Neutral	Yes	BSL-2	No
Catenibacterium sp. co_0103	Neutral	Normal	None	No
Halarchaeum sp. CBA1220	Neutral	Normal	None	No
Halobaculum sp. YSMS11	Neutral	Normal	None	No
Halomonas sp. HG01	Neutral	Normal	None	No
Halorientalis sp. IM1011	Neutral	Normal	None	No
Jeongeupia sp. HS-3	Neutral	Normal	None	No
Mesorhizobium sp. WSM4906	Neutral	Normal	None	No
Methanothermococcus okinawensis	Neutral	Normal	None	No
Microbulbifer sp. YPW16	Neutral	Normal	None	No
Mycoavidus sp. B2-EB	Neutral	Normal	None	No
Oligella urethralis	Neutral	Normal	None	No
Paramecium bursaria Chlorella virus A1	Neutral	Normal	None	No
Parolsenella catena	Neutral	Normal	None	No
Pectobacterium araliae	Neutral	Normal	None	No
Pleurocapsa sp. PCC 7327	Neutral	Normal	None	No
Pseudodesulfovibrio cashew	Neutral	Normal	None	No
Pseudomonas savastanoi	Neutral	Normal	None	No
Spiribacter curvatus	Neutral	Normal	None	No
Spongiactinospora sp. TRM90649	Neutral	Normal	None	No
Stratiformator vulcanicus	Neutral	Normal	None	No
Streptomyces sp. CLI2509	Neutral	Normal	None	No
Thiorhodovibrio frisius	Neutral	Normal	None	No
Treponema saccharophilum	Neutral	Normal	None	No
uncultured Ruegeria sp.	Neutral	Normal	None	No
Acetivibrio thermocellus	Neutral	Normal	None	No
Algoriphagus sp. NBT04N3	Neutral	Normal	None	No
Arachidicoccus terrestris	Neutral	Normal	None	No
Caldicellulosiruptor changbaiensis	Neutral	Normal	None	No
Chitinophaga sp. LS1	Neutral	Normal	None	No
Dickeya dianthicola	Neutral	Normal	None	No
Endozoicomonas sp. GU-1	Neutral	Normal	None	No
Enterococcus wangshanyuanii	Above	Normal	None	No
Erwinia tasmaniensis	Neutral	Normal	None	No
Escherichia albertii	Neutral	Normal	None	No
Gracilibacillus caseinilyticus	Neutral	Normal	None	No
Haladaptatus salinisoli	Neutral	Normal	None	No
Lactobacillus sp. 3B(2020)	Neutral	Normal	None	No
Marinobacter adhaerens	Neutral	Normal	None	No
Marinobacter nanhaiticus	Neutral	Normal	None	No
Moraxella bovis	Neutral	Normal	None	No
Natrinema sp. SYSU A 869	Neutral	Normal	None	No
Photobacterium atrarenae	Neutral	Normal	None	No
Pseudodesulfovibrio sp. 5S69	Neutral	Normal	None	No
Pukyongia salina	Neutral	Normal	None	No
Vreelandella subglaciescola	Neutral	Normal	None	No
Aeromonas schubertii	Neutral	Yes	BSL-2	No
Avibacterium volantium	Neutral	Normal	None	No
Candidatus Erwinia haradaeae	Neutral	Normal	None	No
Candidatus Nanopelagicus hibericus	Neutral	Normal	None	No
Desulfitobacterium hafniense	Neutral	Normal	None	No
Enterococcus durans	Neutral	Yes	BSL-2	No
Entomomonas asaccharolytica	Neutral	Normal	None	No
Flavobacterium sp. NG2	Neutral	Normal	None	No
Halomonas qaidamensis	Neutral	Normal	None	No
Hyphomonas sp. KY3	Neutral	Normal	None	No
Moraxella bovoculi	Neutral	Normal	None	No
Ostreococcus tauri	Neutral	Normal	None	No
Priestia koreensis	Neutral	Normal	None	No
Raoultibacter timonensis	Neutral	Normal	None	No
Streptomyces sp. NBC_00869	Neutral	Normal	None	No
uncultured Anaeromusa sp.	Neutral	Normal	None	No
Ureibacillus sp. FSL K6-8385	Neutral	Normal	None	No
Vibrio alfacsensis	Neutral	Normal	None	No
Bordetella pertussis	Neutral	Yes	BSL-2	No
Dysgonomonas capnocytophagoides	Neutral	Normal	None	No
Kurthia sp. YJT4	Neutral	Normal	None	No
Mariluticola halotolerans	Neutral	Normal	None	No
Methylomicrobium album	Neutral	Normal	None	No
Methylovorus sp. MP688	Neutral	Normal	None	No
Natronosalvus caseinilyticus	Neutral	Normal	None	No
Pseudoalteromonas xiamenensis	Neutral	Normal	None	No
Synechococcus sp. RSCCF101	Neutral	Normal	None	No
Tetrapisispora phaffii	Neutral	Normal	None	No
Turicibacter sanguinis	Neutral	Normal	None	No
Turneriella parva	Neutral	Normal	None	No
Aeoliella mucimassa	Neutral	Normal	None	No
Aeromonas rivuli	Neutral	Normal	None	No
Aminithiophilus ramosus	Neutral	Normal	None	No
Aquimarina sp. TRL1	Neutral	Normal	None	No
Bifidobacterium angulatum	Neutral	Normal	None	No
Campylobacter sp. VBCF_01 NA2	Neutral	Normal	None	No
Clostridium isatidis	Neutral	Normal	None	No
[truncated: 7,124 more rows]
