# Supplementary material
Source: Research Square preprint supplement (doi:10.21203/rs.3.rs-9376613/v1)
Supplement: Supplementary file 4 [file b6ba0a8fd47dc163d5395e8b.xlsx]

## Sheet: Sheet1
TableS3. Antibiotic resistance genes (ARGs) and their potential to be horizontally transferred among rMAGs
Description of the worksheets
Worksheet 1	ARG_information: ARGs identified across all rMAGs with their risk rank
Worksheet 2	rMAG_ARG: ARGs mapped to individual rMAGs
Worksheet 3	HGT-ARG: Horizontal gene transfer status of ARGs among rMAGs

## Sheet: ARG_information
Resistance	Resistance_type	ARGs	Risk index
Multi-compound	Drug_and_biocide_resistance	MEXF	Q1
Multi-compound	Drug_and_biocide_resistance	MEXE	Q1
Drugs	betalactams	MECA	Q1
Drugs	Tetracyclines	TETK	Q1
Drugs	betalactams	MECI	Q1
Multi-compound	Drug_and_biocide_resistance	QACAB	Q1
Multi-compound	Drug_and_biocide_resistance	SME	Q1
Multi-compound	Drug_and_biocide_resistance	MEXH	Q1
Multi-compound	Drug_and_biocide_resistance	ADEJ	Q1
Multi-compound	Drug_and_biocide_resistance	NORA	Q1
Drugs	betalactams	CFX	Q1
Drugs	MLS	ERMC	Q1
Multi-compound	Drug_and_biocide_resistance	CRP	Q1
Drugs	Tetracyclines	TETW	Q1
Drugs	betalactams	OXA	Q2
Multi-compound	Drug_and_biocide_resistance	OPRN	Q2
Drugs	Multi-drug_resistance	OPMD	Q2
Drugs	Multi-drug_resistance	MACA	Q2
Drugs	Glycopeptides	VANRO	low-risk
Drugs	Glycopeptides	VANRS	low-risk
Multi-compound	Biocide_and_metal_resistance	OSCA	low-risk
Metals	Multi-metal_resistance	CUEA	low-risk
Multi-compound	Drug_and_biocide_resistance	CPXAR	low-risk
Metals	Copper_resistance	COPR	low-risk
Metals	Copper_resistance	COPS	low-risk
Metals	Copper_resistance	COPC	low-risk
Metals	Copper_resistance	COPD	low-risk
Multi-compound	Drug_and_biocide_resistance	YAJC	low-risk
Metals	Multi-metal_resistance	RUVBM	low-risk
Multi-compound	Drug_and_biocide_resistance	RSMA	low-risk
Multi-compound	Biocide_and_metal_resistance	RUVB	low-risk
Multi-compound	Drug_and_biocide_resistance	MEXK	low-risk
Biocides	Multi-biocide_resistance	EMHR	low-risk
Biocides	Multi-biocide_resistance	EMHA	low-risk
Multi-compound	Drug_and_biocide_resistance	TTGA	low-risk
Biocides	Multi-biocide_resistance	EMHB	low-risk
Multi-compound	Drug_and_biocide_resistance	TTGB	low-risk
Multi-compound	Drug_and_biocide_resistance	MEXB	low-risk
Multi-compound	Drug_and_biocide_resistance	EMHC	low-risk
Metals	Multi-metal_resistance	RECGM	low-risk
Biocides	Multi-biocide_resistance	MEXW	low-risk
Biocides	Peroxide_resistance	SODB	low-risk
Metals	Multi-metal_resistance	CADC	low-risk
Drugs	MLS	MPH	low-risk
Biocides	Naphthoquinone	ARSHN	low-risk
Metals	Cobalt_resistance	CORT	low-risk
Metals	Aluminum_resistance	G2ALT	low-risk
Metals	Mercury_resistance	MERA	low-risk
Metals	Copper_resistance	TCRY	low-risk
Biocides	Quaternary_Ammonium_Compounds_(QACs)_resistance	GALE	low-risk
Metals	Arsenic_resistance	ARSC	low-risk
Drugs	Multi-drug_resistance	MGRA	low-risk
Biocides	Peroxide_resistance	PERR	low-risk
Metals	Multi-metal_resistance	CADD	low-risk
Drugs	Aminoglycosides	APH3-PRIME	low-risk
Drugs	betalactams	BLAZ	low-risk
Drugs	Multi-drug_resistance	ARLR	low-risk
Drugs	MLS	RLMH	low-risk
Multi-compound	Drug_and_biocide_resistance	QACR	low-risk
Biocides	Phenolic_compound_resistance	FABI	low-risk
Metals	Multi-metal_resistance	ARSBM	low-risk
Drugs	Rifampin	RPOB	low-risk
Biocides	Multi-biocide_resistance	SMRA	low-risk
Drugs	Aminoglycosides	APH3-DPRIME	low-risk
Drugs	betalactams	L1	low-risk
Multi-compound	Drug_and_biocide_resistance	SMET	low-risk
Biocides	Aldehyde_resistance	FORMA	low-risk
Biocides	Multi-biocide_resistance	PCM	low-risk
Biocides	Multi-biocide_resistance	TOLCSM	low-risk
Multi-compound	Drug_and_biocide_resistance	EMRBSM	low-risk
Multi-compound	Drug_and_biocide_resistance	EMRASM	low-risk
Multi-compound	Drug_and_biocide_resistance	EMRCSM	low-risk
Multi-compound	Drug_and_biocide_resistance	EMRRSM	low-risk
Metals	Multi-metal_resistance	GOLT	low-risk
Biocides	Multi-biocide_resistance	OPRJ	low-risk
Multi-compound	Drug_and_biocide_resistance	MEXC	low-risk
Multi-compound	Drug_and_biocide_resistance	MEXD	low-risk
Drugs	Multi-drug_resistance	PARS	low-risk
Drugs	Multi-drug_resistance	PARR	low-risk
Multi-compound	Drug_and_biocide_resistance	MEXY	low-risk
Multi-compound	Drug_and_biocide_resistance	MEXX	low-risk
Metals	Copper_resistance	CINA	low-risk
Metals	Multi-metal_resistance	CZRA	low-risk
Metals	Multi-metal_resistance	CZRB	low-risk
Drugs	Multi-drug_resistance	OPMB	low-risk
Drugs	Multi-drug_resistance	MUXC	low-risk
Drugs	Multi-drug_resistance	MUXB	low-risk
Multi-compound	Drug_and_biocide_resistance	PMPM	low-risk
Metals	Multi-metal_resistance	FPTA	low-risk
Drugs	betalactams	PDC	low-risk
Drugs	Cationic_antimicrobial_peptides	BASRS	low-risk
Drugs	Multi-drug_resistance	EMRE	low-risk
Drugs	Multi-drug_resistance	MUXA	low-risk
Multi-compound	Drug_and_biocide_resistance	SOXR	low-risk
Drugs	Fosfomycin	FOSA	low-risk
Biocides	Multi-biocide_resistance	YJCG	low-risk
Multi-compound	Drug_and_biocide_resistance	BCR1	low-risk
Multi-compound	Drug_and_biocide_resistance	MEXI	low-risk
Multi-compound	Drug_and_biocide_resistance	MEXG	low-risk
Multi-compound	Drug_and_biocide_resistance	MEXN	low-risk
Multi-compound	Drug_and_biocide_resistance	MEXQ	low-risk
Biocides	Phenolic_compound_resistance	TRIC	low-risk
Biocides	Phenolic_compound_resistance	TRIB	low-risk
Biocides	Phenolic_compound_resistance	TRIA	low-risk
Multi-compound	Biocide_and_metal_resistance	YGIW	low-risk
Biocides	Multi-biocide_resistance	MEXV	low-risk
Drugs	Multi-drug_resistance	OPMH	low-risk
Drugs	Cationic_antimicrobial_peptides	ARNA	low-risk
Drugs	Lipopeptides	CPRR	low-risk
Drugs	Lipopeptides	CPRS	low-risk
Multi-compound	Drug_and_biocide_resistance	MEXR	low-risk
Multi-compound	Drug_and_biocide_resistance	MEXA	low-risk
Biocides	Multi-biocide_resistance	OPRM	low-risk
Multi-compound	Drug_and_biocide_resistance	MEXJ	low-risk
Multi-compound	Drug_and_biocide_resistance	MEXL	low-risk
Drugs	Phenicol	CAT	low-risk
Biocides	Peroxide_resistance	SODA	low-risk
Multi-compound	Drug_and_biocide_resistance	ADEB	low-risk
Multi-compound	Drug_and_biocide_resistance	ADEA	low-risk
Multi-compound	Drug_and_biocide_resistance	ADER	low-risk
Metals	Multi-metal_resistance	NREB	low-risk
Multi-compound	Drug_and_biocide_resistance	ADEK	low-risk
Multi-compound	Drug_and_biocide_resistance	ABEM	low-risk
Multi-compound	Drug_and_biocide_resistance	MEXT	low-risk
Drugs	Aminoglycosides	ANT3-DPRIME	low-risk
Drugs	Cationic_antimicrobial_peptides	MPRF	low-risk
Multi-compound	Drug_and_biocide_resistance	BEPD	low-risk
Drugs	betalactams	OCH	low-risk
Multi-compound	Drug_and_biocide_resistance	BEPE	low-risk
Drugs	Phenicol	CML	low-risk
Metals	Multi-metal_resistance	SILP	low-risk
Metals	Copper_resistance	ACTPC	low-risk
Multi-compound	Drug_and_biocide_resistance	BEPC	low-risk
Drugs	Fosfomycin	FOSB	low-risk
Drugs	Multi-drug_resistance	LSAC	low-risk
Drugs	MLS	LNUC	low-risk
Drugs	Sulfonamides	SULII	low-risk
Drugs	Sulfonamides	SULI	low-risk
Drugs	Tetracyclines	TETB60	low-risk
Drugs	Tetracyclines	TETA60	low-risk
Drugs	MLS	MPHC	low-risk
Metals	Multi-metal_resistance	CADX	low-risk
Drugs	Lipopeptides	ICR	low-risk
Drugs	Aminoglycosides	RANB	low-risk
Metals	Arsenic_resistance	PSTB	low-risk
Multi-compound	Drug_and_biocide_and_metal_resistance	GESB	low-risk
Metals	Copper_resistance	COPA	low-risk
Metals	Multi-metal_resistance	CZCP	low-risk
Drugs	Multi-drug_resistance	TOPR	low-risk
Multi-compound	Drug_and_biocide_resistance	MEXD1	low-risk
Metals	Multi-metal_resistance	MREA	low-risk
Drugs	Multi-drug_resistance	MEXC1	low-risk
Multi-compound	Drug_and_biocide_resistance	MTRE	low-risk
Multi-compound	Drug_and_biocide_resistance	MTRD	low-risk
Drugs	Multi-drug_resistance	NORMD	low-risk
Drugs	MLS	MSRD	low-risk
Multi-compound	Drug_and_biocide_resistance	FARR	low-risk
Metals	Copper_resistance	DNAK	low-risk
Drugs	betalactams	BLAR	low-risk
Drugs	betalactams	BLAI	low-risk
Metals	Multi-metal_resistance	FBPA	low-risk
Metals	Multi-metal_resistance	FBPB	low-risk
Drugs	Tetracyclines	TETO	low-risk
Metals	Copper_resistance	TCRB	low-risk
Drugs	Multi-drug_resistance	MACB	low-risk
Multi-compound	Drug_and_biocide_resistance	FARB	low-risk
Multi-compound	Drug_and_biocide_resistance	MTRC	low-risk
Metals	Copper_resistance	TCRA	low-risk
Metals	Copper_resistance	TCRZ	low-risk
Drugs	MLS	LLMA	low-risk
Metals	Mercury_resistance	MERR	low-risk
Metals	Mercury_resistance	MERT	low-risk
Metals	Mercury_resistance	MERB	low-risk
Drugs	Tetracyclines	TETA	low-risk
Metals	Mercury_resistance	MERR1	low-risk
Metals	Mercury_resistance	MERR2	low-risk
Biocides	Phenolic_compound_resistance	FABK	low-risk
Drugs	MLS	MPHE	low-risk
Drugs	MLS	MSRE	low-risk
Metals	Mercury_resistance	MERF	low-risk
Metals	Chromium_resistance	CHRA	low-risk
Multi-compound	Biocide_and_metal_resistance	CHR	low-risk
Metals	Mercury_resistance	MERP	low-risk
Metals	Mercury_resistance	MERD	low-risk
Metals	Mercury_resistance	MERE	low-risk
Metals	Copper_resistance	COPG	low-risk
Metals	Copper_resistance	COPB	low-risk
Metals	Copper_resistance	PCOR	low-risk

## Sheet: rMAG_ARG
rMAG	qseqid	sseqid	pident	length	mismatch	gapopen	qstart	qend	sstart	send	evalue	bitscore	qlen	slen	ARGs	Resistance	Resistance_type	Resistance_mechanism
316_bin.1_g__Promicromonospora	JNNPNMAF_04878	MEG_7485|Drugs|Glycopeptides|VanO-type_regulator|VANRO	87.611	226	28	0	1	226	4	229	4.93e-132	369	226	233	VANRO	Drugs	Glycopeptides	VanO-type_regulator
316_bin.1_g__Promicromonospora	JNNPNMAF_04878	MEG_8725|Drugs|Glycopeptides|VanR-type_regulator|VANRS	90.95	221	20	0	1	221	1	221	8.12e-132	368	226	231	VANRS	Drugs	Glycopeptides	VanR-type_regulator
316_bin.6_g__Pseudomonas_E	BDMEPDHM_00396	MEG_4377|Multi-compound|Biocide_and_metal_resistance|Biocide_and_metal_resistance_protein|OSCA	88.333	60	7	0	1	60	1	60	6.74e-35	110	60	60	OSCA	Multi-compound	Biocide_and_metal_resistance	Biocide_and_metal_resistance_protein
316_bin.6_g__Pseudomonas_E	BDMEPDHM_00841	MEG_2439|Metals|Multi-metal_resistance|Multi-metal_resistance_protein|CUEA	97.365	797	21	0	1	797	1	797	0	1556	797	797	CUEA	Metals	Multi-metal_resistance	Multi-metal_resistance_protein
330_bin.7_g__Acinetobacter	HLGBIKOJ_02626	MEG_692|Multi-compound|Drug_and_biocide_resistance|Drug_and_biocide_RND_efflux_pumps|ADEJ	86.093	1057	146	1	1	1057	1	1056	0	1894	1057	1058	ADEJ	Multi-compound	Drug_and_biocide_resistance	Drug_and_biocide_RND_efflux_pumps
316_bin.6_g__Pseudomonas_E	BDMEPDHM_01129	MEG_3908|Multi-compound|Drug_and_biocide_resistance|Drug_and_biocide_RND_efflux_pumps|MEXE	81.579	418	71	2	1	417	1	413	0	688	417	413	MEXE	Multi-compound	Drug_and_biocide_resistance	Drug_and_biocide_RND_efflux_pumps
316_bin.6_g__Pseudomonas_E	BDMEPDHM_01223	MEG_2117|Multi-compound|Drug_and_biocide_resistance|Drug_and_biocide_RND_efflux_regulator|CPXAR	82.589	224	39	0	1	224	1	224	3.49e-132	369	225	225	CPXAR	Multi-compound	Drug_and_biocide_resistance	Drug_and_biocide_RND_efflux_regulator
316_bin.6_g__Pseudomonas_E	BDMEPDHM_02244	MEG_2074|Metals|Copper_resistance|Copper_resistance_regulator|COPR	95.575	226	10	0	1	226	1	226	1.67e-145	403	228	231	COPR	Metals	Copper_resistance	Copper_resistance_regulator
316_bin.6_g__Pseudomonas_E	BDMEPDHM_02245	MEG_2078|Metals|Copper_resistance|Copper_resistance_regulator|COPS	87.364	459	58	0	1	459	1	459	0	836	462	462	COPS	Metals	Copper_resistance	Copper_resistance_regulator
316_bin.6_g__Pseudomonas_E	BDMEPDHM_02246	MEG_2049|Metals|Copper_resistance|Copper_resistance_protein|COPC	95.276	127	6	0	1	127	1	127	2e-86	245	127	127	COPC	Metals	Copper_resistance	Copper_resistance_protein
316_bin.6_g__Pseudomonas_E	BDMEPDHM_02247	MEG_2055|Metals|Copper_resistance|Copper_resistance_protein|COPD	90.354	311	30	0	1	311	1	311	0	511	312	312	COPD	Metals	Copper_resistance	Copper_resistance_protein
316_bin.6_g__Pseudomonas_E	BDMEPDHM_02582	MEG_8741|Multi-compound|Drug_and_biocide_resistance|Drug_and_biocide_RND_efflux_regulator|YAJC	84.821	112	17	0	1	112	1	112	3.07e-55	165	112	112	YAJC	Multi-compound	Drug_and_biocide_resistance	Drug_and_biocide_RND_efflux_regulator
316_bin.6_g__Pseudomonas_E	BDMEPDHM_03250	MEG_6154|Metals|Multi-metal_resistance|Multi-metal_resistance_protein|RUVBM	86.167	347	47	1	1	347	1	346	0	590	353	352	RUVBM	Metals	Multi-metal_resistance	Multi-metal_resistance_protein
316_bin.6_g__Pseudomonas_E	BDMEPDHM_04071	MEG_8686|Multi-compound|Drug_and_biocide_resistance|Drug_and_biocide_RND_efflux_pumps|RSMA	80.645	62	11	1	1	62	1	61	6.06e-32	102	62	61	RSMA	Multi-compound	Drug_and_biocide_resistance	Drug_and_biocide_RND_efflux_pumps
316_bin.6_g__Pseudomonas_E	BDMEPDHM_04125	MEG_6153|Multi-compound|Biocide_and_metal_resistance|Biocide_and_metal_resistance_protein|RUVB	96.725	397	13	0	1	397	1	397	0	776	422	397	RUVB	Multi-compound	Biocide_and_metal_resistance	Biocide_and_metal_resistance_protein
316_bin.6_g__Pseudomonas_E	BDMEPDHM_04255	MEG_3917|Multi-compound|Drug_and_biocide_resistance|Drug_and_biocide_RND_efflux_pumps|MEXK	81.489	1021	189	0	1	1021	1	1021	0	1704	1022	1025	MEXK	Multi-compound	Drug_and_biocide_resistance	Drug_and_biocide_RND_efflux_pumps
316_bin.6_g__Pseudomonas_E	BDMEPDHM_04423	MEG_2719|Biocides|Multi-biocide_resistance|Multi-biocide_RND_efflux_regulator|EMHR	87.56	209	26	0	1	209	1	209	1.46e-137	381	210	210	EMHR	Biocides	Multi-biocide_resistance	Multi-biocide_RND_efflux_regulator
316_bin.6_g__Pseudomonas_E	BDMEPDHM_04424	MEG_2715|Biocides|Multi-biocide_resistance|Multi-biocide_RND_efflux_pump|EMHA	92.208	385	30	0	1	385	1	385	0	694	385	385	EMHA	Biocides	Multi-biocide_resistance	Multi-biocide_RND_efflux_pump
316_bin.6_g__Pseudomonas_E	BDMEPDHM_04424	MEG_7286|Multi-compound|Drug_and_biocide_resistance|Drug_and_biocide_RND_efflux_pumps|TTGA	80.593	371	70	1	1	371	1	369	0	592	385	384	TTGA	Multi-compound	Drug_and_biocide_resistance	Drug_and_biocide_RND_efflux_pumps
316_bin.6_g__Pseudomonas_E	BDMEPDHM_04425	MEG_2716|Biocides|Multi-biocide_resistance|Multi-biocide_RND_efflux_pump|EMHB	92.315	1054	81	0	1	1054	1	1054	0	1999	1054	1054	EMHB	Biocides	Multi-biocide_resistance	Multi-biocide_RND_efflux_pump
316_bin.6_g__Pseudomonas_E	BDMEPDHM_04425	MEG_7288|Multi-compound|Drug_and_biocide_resistance|Drug_and_biocide_RND_efflux_pumps|TTGB	86.919	1055	132	2	1	1054	1	1050	0	1868	1054	1050	TTGB	Multi-compound	Drug_and_biocide_resistance	Drug_and_biocide_RND_efflux_pumps
316_bin.6_g__Pseudomonas_E	BDMEPDHM_04425	MEG_3903|Multi-compound|Drug_and_biocide_resistance|Drug_and_biocide_RND_efflux_pumps|MEXB	80.153	1048	202	2	1	1047	1	1043	0	1730	1054	1046	MEXB	Multi-compound	Drug_and_biocide_resistance	Drug_and_biocide_RND_efflux_pumps
316_bin.6_g__Pseudomonas_E	BDMEPDHM_04426	MEG_2717|Multi-compound|Drug_and_biocide_resistance|Drug_and_biocide_RND_efflux_pumps|EMHC	94.033	486	29	0	1	486	1	486	0	899	486	486	EMHC	Multi-compound	Drug_and_biocide_resistance	Drug_and_biocide_RND_efflux_pumps
316_bin.6_g__Pseudomonas_E	BDMEPDHM_04689	MEG_6053|Metals|Multi-metal_resistance|Multi-metal_resistance_protein|RECGM	84.226	691	109	0	1	691	1	691	0	1157	691	691	RECGM	Metals	Multi-metal_resistance	Multi-metal_resistance_protein
316_bin.6_g__Pseudomonas_E	BDMEPDHM_05042	MEG_3936|Biocides|Multi-biocide_resistance|Multi-biocide_RND_efflux_pump|MEXW	82.224	1007	179	0	1	1007	1	1007	0	1659	1008	1018	MEXW	Biocides	Multi-biocide_resistance	Multi-biocide_RND_efflux_pump
316_bin.6_g__Pseudomonas_E	BDMEPDHM_05049	MEG_6546|Biocides|Peroxide_resistance|peroxide_resistance_protein|SODB	91.623	191	16	0	1	191	1	191	1.31e-134	373	198	193	SODB	Biocides	Peroxide_resistance	peroxide_resistance_protein
323_bin.22_g__Exiguobacterium	IBOCKECM_01618	MEG_1485|Metals|Multi-metal_resistance|Multi-metal_resistance_regulator|CADC	86.885	122	16	0	1	122	1	122	1.07e-77	223	122	122	CADC	Metals	Multi-metal_resistance	Multi-metal_resistance_regulator
323_bin.22_g__Exiguobacterium	IBOCKECM_02991	MEG_4027|Drugs|MLS|Macrolide_phosphotransferases|MPH	98.986	296	3	0	1	296	1	296	0	602	296	296	MPH	Drugs	MLS	Macrolide_phosphotransferases
323_bin.30_f__Chroococcidiopsidaceae	EFJHMBII_00646	MEG_1168|Biocides|Naphthoquinone|Naphthoquinone_resistance_protein|ARSHN	84.925	199	30	0	3	201	4	202	3.42e-130	363	221	206	ARSHN	Biocides	Naphthoquinone	Naphthoquinone_resistance_protein
323_bin.30_f__Chroococcidiopsidaceae	EFJHMBII_05444	MEG_1168|Biocides|Naphthoquinone|Naphthoquinone_resistance_protein|ARSHN	83.163	196	33	0	18	213	1	196	7.61e-125	349	215	206	ARSHN	Biocides	Naphthoquinone	Naphthoquinone_resistance_protein
323_bin.32_f__Coleofasciculaceae	MBJAOAGK_00060	MEG_2096|Metals|Cobalt_resistance|Cobalt_transporting_ATPase|CORT	81.308	107	20	0	1	107	535	641	1.24e-55	180	108	642	CORT	Metals	Cobalt_resistance	Cobalt_transporting_ATPase
323_bin.39_s__Parageobacillus_toebii	FEPHPHCF_02130	MEG_3075|Metals|Aluminum_resistance|Aluminum_ATPase_|G2ALT	90.783	217	20	0	1	217	1	217	3.72e-151	417	221	221	G2ALT	Metals	Aluminum_resistance	Aluminum_ATPase_
323_bin.39_s__Parageobacillus_toebii	FEPHPHCF_01958	MEG_3838|Metals|Mercury_resistance|Mercury_resistance_protein|MERA	85.938	64	9	0	1	64	568	631	7.78e-33	115	64	631	MERA	Metals	Mercury_resistance	Mercury_resistance_protein
323_bin.57_o__Coriobacteriales	PMKIDFMA_01290	MEG_6653|Metals|Copper_resistance|Copper_resistance_protein|TCRY	81.633	98	18	0	3	100	54	151	3.95e-57	171	100	151	TCRY	Metals	Copper_resistance	Copper_resistance_protein
323_bin.60_g__Veillonella	BEEGFJGF_00781	MEG_3084|Biocides|Quaternary_Ammonium_Compounds_(QACs)_resistance|QAC-resistant_protein_UDP_glucose_4_epimerase|GALE	95.441	329	15	0	1	329	1	329	0	650	329	329	GALE	Biocides	Quaternary_Ammonium_Compounds_(QACs)_resistance	QAC-resistant_protein_UDP_glucose_4_epimerase
817_bin.50_s__Acinetobacter_junii	OKICCNEC_01541	MEG_692|Multi-compound|Drug_and_biocide_resistance|Drug_and_biocide_RND_efflux_pumps|ADEJ	86.435	317	43	0	1	317	740	1056	0	578	317	1058	ADEJ	Multi-compound	Drug_and_biocide_resistance	Drug_and_biocide_RND_efflux_pumps
330_bin.11_s__Staphylococcus_hominis	OADHDGDI_00848	MEG_1156|Metals|Arsenic_resistance|Arsenic_resistance_protein|ARSC	86.26	131	18	0	1	131	1	131	2.19e-84	240	131	131	ARSC	Metals	Arsenic_resistance	Arsenic_resistance_protein
330_bin.11_s__Staphylococcus_hominis	OADHDGDI_01347	MEG_3943|Drugs|Multi-drug_resistance|MDR_regulator|MGRA	88.276	145	17	0	1	145	1	145	2.07e-93	265	145	147	MGRA	Drugs	Multi-drug_resistance	MDR_regulator
330_bin.11_s__Staphylococcus_hominis	OADHDGDI_01736	MEG_5772|Biocides|Peroxide_resistance|peroxide_resistance_regulator|PERR	85.135	148	22	0	5	152	1	148	3.95e-98	277	153	148	PERR	Biocides	Peroxide_resistance	peroxide_resistance_regulator
330_bin.11_s__Staphylococcus_hominis	OADHDGDI_01755	MEG_1486|Metals|Multi-metal_resistance|Multi-metal_resistance_protein|CADD	80	205	41	0	1	205	1	205	3.25e-121	340	205	205	CADD	Metals	Multi-metal_resistance	Multi-metal_resistance_protein
330_bin.11_s__Staphylococcus_hominis	OADHDGDI_01849	MEG_1060|Drugs|Aminoglycosides|Aminoglycoside_O-phosphotransferases|APH3-PRIME	89.734	263	27	0	1	263	4	266	0	503	263	266	APH3-PRIME	Drugs	Aminoglycosides	Aminoglycoside_O-phosphotransferases
330_bin.11_s__Staphylococcus_hominis	OADHDGDI_00851	MEG_1403|Drugs|betalactams|Class_A_betalactamases|BLAZ	99.522	209	1	0	1	209	73	281	4.14e-150	416	209	281	BLAZ	Drugs	betalactams	Class_A_betalactamases
406_bin.2_g__Prevotella	JKJAADLL_01770	MEG_1694|Drugs|betalactams|Class_A_betalactamases|CFX	99.688	321	1	0	1	321	1	321	0	658	321	321	CFX	Drugs	betalactams	Class_A_betalactamases
330_bin.11_s__Staphylococcus_hominis	OADHDGDI_00342	MEG_1117|Drugs|Multi-drug_resistance|MDR_regulator|ARLR	82.192	219	39	0	1	219	1	219	6.43e-134	373	219	219	ARLR	Drugs	Multi-drug_resistance	MDR_regulator
330_bin.11_s__Staphylococcus_hominis	OADHDGDI_00661	MEG_6058|Drugs|MLS|23S_rRNA_methyltransferases|RLMH	91.824	159	13	0	1	159	1	159	1.92e-108	303	159	159	RLMH	Drugs	MLS	23S_rRNA_methyltransferases
817_bin.2_g__Porphyromonas_A	JNMLGHLO_00466	MEG_1692|Drugs|betalactams|Class_A_betalactamases|CFX	100	321	0	0	1	321	1	321	0	661	321	321	CFX	Drugs	betalactams	Class_A_betalactamases
511_bin.65_s__Mesocricetibacter_sp905373425	NFOIJKMA_00945	MEG_2132|Multi-compound|Drug_and_biocide_resistance|Drug_and_biocide_RND_efflux_regulator|CRP	81.683	202	37	0	13	214	9	210	3.58e-128	358	214	210	CRP	Multi-compound	Drug_and_biocide_resistance	Drug_and_biocide_RND_efflux_regulator
330_bin.11_s__Staphylococcus_hominis	OADHDGDI_00764	MEG_5856|Multi-compound|Drug_and_biocide_resistance|Drug_and_biocide_MFS_efflux_regulator|QACR	98.925	186	2	0	1	186	3	188	1.5e-132	367	186	188	QACR	Multi-compound	Drug_and_biocide_resistance	Drug_and_biocide_MFS_efflux_regulator
330_bin.11_s__Staphylococcus_hominis	OADHDGDI_00768	MEG_2874|Biocides|Phenolic_compound_resistance|Phenolic_resistance_protein|FABI	89.744	117	12	0	1	117	1	117	2.26e-73	216	118	256	FABI	Biocides	Phenolic_compound_resistance	Phenolic_resistance_protein
330_bin.11_s__Staphylococcus_hominis	OADHDGDI_00847	MEG_1150|Metals|Multi-metal_resistance|Multi-metal_resistance_protein|ARSBM	82.237	304	54	0	1	304	126	429	0	505	304	429	ARSBM	Metals	Multi-metal_resistance	Multi-metal_resistance_protein
330_bin.13_s__Scardovia_wiggsiae	POFLBFCH_01094	MEG_8674|Drugs|Rifampin|Rifampin-resistant_beta-subunit_of_RNA_polymerase_RpoB|RPOB	86.081	740	103	0	1	740	445	1184	0	1310	746	1186	RPOB	Drugs	Rifampin	Rifampin-resistant_beta-subunit_of_RNA_polymerase_RpoB
330_bin.14_g__Stenotrophomonas	HCFFIMCJ_00135	MEG_6535|Biocides|Multi-biocide_resistance|Multi-biocide_ABC_efflux_pump|SMRA	99.508	610	3	0	1	610	1	610	0	1223	610	610	SMRA	Biocides	Multi-biocide_resistance	Multi-biocide_ABC_efflux_pump
330_bin.14_g__Stenotrophomonas	HCFFIMCJ_00252	MEG_1052|Drugs|Aminoglycosides|Aminoglycoside_O-phosphotransferases|APH3-DPRIME	90.37	270	26	0	1	270	1	270	2.17e-178	489	270	270	APH3-DPRIME	Drugs	Aminoglycosides	Aminoglycoside_O-phosphotransferases
330_bin.14_g__Stenotrophomonas	HCFFIMCJ_00555	MEG_3532|Drugs|betalactams|Class_B_betalactamases|L1	97.039	304	9	0	1	304	1	304	0	585	304	304	L1	Drugs	betalactams	Class_B_betalactamases
330_bin.14_g__Stenotrophomonas	HCFFIMCJ_01161	MEG_6530|Multi-compound|Drug_and_biocide_resistance|Drug_and_biocide_RND_efflux_regulator|SMET	98.63	219	3	0	1	219	1	219	7.42e-160	438	219	219	SMET	Multi-compound	Drug_and_biocide_resistance	Drug_and_biocide_RND_efflux_regulator
330_bin.14_g__Stenotrophomonas	HCFFIMCJ_02067	MEG_8087|Biocides|Aldehyde_resistance|Aldehyde_degradation|FORMA	87.263	369	47	0	1	369	1	369	0	657	369	369	FORMA	Biocides	Aldehyde_resistance	Aldehyde_degradation
330_bin.14_g__Stenotrophomonas	HCFFIMCJ_02214	MEG_5415|Biocides|Multi-biocide_resistance|Multi-biocide_resistance_regulator|PCM	99.07	215	2	0	1	215	1	215	5.2e-156	428	215	215	PCM	Biocides	Multi-biocide_resistance	Multi-biocide_resistance_regulator
330_bin.14_g__Stenotrophomonas	HCFFIMCJ_02215	MEG_7268|Biocides|Multi-biocide_resistance|Multi-biocide_RND_efflux_pump|TOLCSM	95.133	452	22	0	1	452	1	452	0	830	452	452	TOLCSM	Biocides	Multi-biocide_resistance	Multi-biocide_RND_efflux_pump
330_bin.14_g__Stenotrophomonas	HCFFIMCJ_02271	MEG_3524|Drugs|betalactams|Class_B_betalactamases|L1	88.966	290	32	0	1	290	1	290	0	521	290	290	L1	Drugs	betalactams	Class_B_betalactamases
330_bin.14_g__Stenotrophomonas	HCFFIMCJ_02620	MEG_2726|Multi-compound|Drug_and_biocide_resistance|Drug_and_biocide_MFS_efflux_pumps|EMRBSM	98.864	528	6	0	1	528	1	528	0	1046	528	528	EMRBSM	Multi-compound	Drug_and_biocide_resistance	Drug_and_biocide_MFS_efflux_pumps
330_bin.14_g__Stenotrophomonas	HCFFIMCJ_02621	MEG_2723|Multi-compound|Drug_and_biocide_resistance|Drug_and_biocide_MFS_efflux_pumps|EMRASM	99.491	393	1	1	1	392	1	393	0	783	392	393	EMRASM	Multi-compound	Drug_and_biocide_resistance	Drug_and_biocide_MFS_efflux_pumps
330_bin.14_g__Stenotrophomonas	HCFFIMCJ_02622	MEG_2727|Multi-compound|Drug_and_biocide_resistance|Drug_and_biocide_MFS_efflux_pumps|EMRCSM	96.982	497	15	0	1	497	1	497	0	953	497	497	EMRCSM	Multi-compound	Drug_and_biocide_resistance	Drug_and_biocide_MFS_efflux_pumps
330_bin.14_g__Stenotrophomonas	HCFFIMCJ_02623	MEG_2735|Multi-compound|Drug_and_biocide_resistance|Drug_and_biocide_MFS_efflux_regulator|EMRRSM	97.959	147	3	0	1	147	1	147	8.31e-103	288	147	147	EMRRSM	Multi-compound	Drug_and_biocide_resistance	Drug_and_biocide_MFS_efflux_regulator
330_bin.14_g__Stenotrophomonas	HCFFIMCJ_03093	MEG_3168|Metals|Multi-metal_resistance|Multi-metal_resistance_protein|GOLT	81.611	745	137	0	82	826	10	754	0	1231	833	762	GOLT	Metals	Multi-metal_resistance	Multi-metal_resistance_protein
330_bin.14_g__Stenotrophomonas	HCFFIMCJ_03165	MEG_1036|Drugs|Aminoglycosides|Aminoglycoside_O-phosphotransferases|APH3-DPRIME	91.386	267	23	0	1	267	1	267	3.96e-178	489	267	267	APH3-DPRIME	Drugs	Aminoglycosides	Aminoglycoside_O-phosphotransferases
330_bin.14_g__Stenotrophomonas	HCFFIMCJ_03165	MEG_1067|Drugs|Aminoglycosides|Aminoglycoside_O-phosphotransferases|APH3-PRIME	83.895	267	43	0	1	267	1	267	3.07e-161	446	267	267	APH3-PRIME	Drugs	Aminoglycosides	Aminoglycoside_O-phosphotransferases
330_bin.14_g__Stenotrophomonas	HCFFIMCJ_03568	MEG_6530|Multi-compound|Drug_and_biocide_resistance|Drug_and_biocide_RND_efflux_regulator|SMET	98.63	219	3	0	1	219	1	219	8.75e-160	438	219	219	SMET	Multi-compound	Drug_and_biocide_resistance	Drug_and_biocide_RND_efflux_regulator
330_bin.14_g__Stenotrophomonas	HCFFIMCJ_03569	MEG_6521|Multi-compound|Drug_and_biocide_resistance|Drug_and_biocide_RND_efflux_pumps|SME	97.462	394	10	0	1	394	1	394	0	761	394	394	SME	Multi-compound	Drug_and_biocide_resistance	Drug_and_biocide_RND_efflux_pumps
406_bin.8_s__Gemella_sanguinis	IGLEOEFN_00010	MEG_2819|Drugs|MLS|23S_rRNA_methyltransferases|ERMC	99.18	244	2	0	1	244	1	244	3.57e-179	489	244	244	ERMC	Drugs	MLS	23S_rRNA_methyltransferases
330_bin.14_g__Stenotrophomonas	HCFFIMCJ_03571	MEG_6523|Multi-compound|Drug_and_biocide_resistance|Drug_and_biocide_RND_efflux_pumps|SME	99.132	461	4	0	1	461	6	466	0	907	461	466	SME	Multi-compound	Drug_and_biocide_resistance	Drug_and_biocide_RND_efflux_pumps
330_bin.15_g__Pseudomonas	ICHJHFDL_00425	MEG_4298|Biocides|Multi-biocide_resistance|Multi-biocide_RND_efflux_pump|OPRJ	99.791	479	1	0	1	479	1	479	0	942	479	479	OPRJ	Biocides	Multi-biocide_resistance	Multi-biocide_RND_efflux_pump
330_bin.15_g__Pseudomonas	ICHJHFDL_02050	MEG_3906|Multi-compound|Drug_and_biocide_resistance|Drug_and_biocide_RND_efflux_pumps|MEXC	98.87	354	4	0	1	354	34	387	0	680	354	387	MEXC	Multi-compound	Drug_and_biocide_resistance	Drug_and_biocide_RND_efflux_pumps
330_bin.15_g__Pseudomonas	ICHJHFDL_00426	MEG_3907|Multi-compound|Drug_and_biocide_resistance|Drug_and_biocide_RND_efflux_pumps|MEXD	94.096	813	34	4	1	806	238	1043	0	1455	806	1043	MEXD	Multi-compound	Drug_and_biocide_resistance	Drug_and_biocide_RND_efflux_pumps
330_bin.15_g__Pseudomonas	ICHJHFDL_00593	MEG_1034|Drugs|Aminoglycosides|Aminoglycoside_O-phosphotransferases|APH3-DPRIME	99.627	268	1	0	1	268	1	268	0	530	268	268	APH3-DPRIME	Drugs	Aminoglycosides	Aminoglycoside_O-phosphotransferases
330_bin.15_g__Pseudomonas	ICHJHFDL_00593	MEG_1076|Drugs|Aminoglycosides|Aminoglycoside_O-phosphotransferases|APH3-PRIME	98.881	268	3	0	1	268	1	268	0	525	268	268	APH3-PRIME	Drugs	Aminoglycosides	Aminoglycoside_O-phosphotransferases
330_bin.15_g__Pseudomonas	ICHJHFDL_02152	MEG_4848|Drugs|betalactams|Class_D_betalactamases|OXA	99.237	262	2	0	1	262	1	262	0	533	262	262	OXA	Drugs	betalactams	Class_D_betalactamases
330_bin.15_g__Pseudomonas	ICHJHFDL_02386	MEG_8452|Drugs|Multi-drug_resistance|MDR_regulator|PARS	99.533	428	2	0	1	428	1	428	0	858	428	428	PARS	Drugs	Multi-drug_resistance	MDR_regulator
330_bin.15_g__Pseudomonas	ICHJHFDL_02387	MEG_8451|Drugs|Multi-drug_resistance|MDR_regulator|PARR	100	235	0	0	1	235	1	235	9e-173	472	235	235	PARR	Drugs	Multi-drug_resistance	MDR_regulator
330_bin.15_g__Pseudomonas	ICHJHFDL_02789	MEG_8741|Multi-compound|Drug_and_biocide_resistance|Drug_and_biocide_RND_efflux_regulator|YAJC	100	112	0	0	1	112	1	112	2.85e-78	223	112	112	YAJC	Multi-compound	Drug_and_biocide_resistance	Drug_and_biocide_RND_efflux_regulator
330_bin.15_g__Pseudomonas	ICHJHFDL_02867	MEG_3940|Multi-compound|Drug_and_biocide_resistance|Drug_and_biocide_RND_efflux_pumps|MEXY	99.809	1045	2	0	1	1045	1	1045	0	2090	1045	1045	MEXY	Multi-compound	Drug_and_biocide_resistance	Drug_and_biocide_RND_efflux_pumps
330_bin.15_g__Pseudomonas	ICHJHFDL_02868	MEG_3938|Multi-compound|Drug_and_biocide_resistance|Drug_and_biocide_RND_efflux_pumps|MEXX	98.99	396	4	0	1	396	1	396	0	767	396	396	MEXX	Multi-compound	Drug_and_biocide_resistance	Drug_and_biocide_RND_efflux_pumps
330_bin.15_g__Pseudomonas	ICHJHFDL_03049	MEG_1722|Metals|Copper_resistance|Copper_resistance_protein|CINA	96.133	181	4	1	1	178	25	205	1.7e-127	354	178	205	CINA	Metals	Copper_resistance	Copper_resistance_protein
330_bin.15_g__Pseudomonas	ICHJHFDL_03182	MEG_2479|Metals|Multi-metal_resistance|Multi-metal_RND_efflux_pumps|CZRA	98.953	1051	11	0	1	1051	1	1051	0	2067	1051	1051	CZRA	Metals	Multi-metal_resistance	Multi-metal_RND_efflux_pumps
330_bin.15_g__Pseudomonas	ICHJHFDL_03183	MEG_2480|Metals|Multi-metal_resistance|Multi-metal_RND_efflux_pumps|CZRB	91.972	436	4	1	49	484	1	405	0	777	484	405	CZRB	Metals	Multi-metal_resistance	Multi-metal_RND_efflux_pumps
330_bin.15_g__Pseudomonas	ICHJHFDL_03188	MEG_4292|Drugs|Multi-drug_resistance|Multi-drug_RND_efflux_pumps|OPMB	100	498	0	0	1	498	1	498	0	1004	498	498	OPMB	Drugs	Multi-drug_resistance	Multi-drug_RND_efflux_pumps
330_bin.15_g__Pseudomonas	ICHJHFDL_03189	MEG_4102|Drugs|Multi-drug_resistance|Multi-drug_RND_efflux_pumps|MUXC	100	1036	0	0	1	1036	1	1036	0	2078	1036	1036	MUXC	Drugs	Multi-drug_resistance	Multi-drug_RND_efflux_pumps
330_bin.15_g__Pseudomonas	ICHJHFDL_03190	MEG_4101|Drugs|Multi-drug_resistance|Multi-drug_RND_efflux_pumps|MUXB	99.88	836	1	0	1	836	208	1043	0	1669	836	1043	MUXB	Drugs	Multi-drug_resistance	Multi-drug_RND_efflux_pumps
330_bin.15_g__Pseudomonas	ICHJHFDL_03246	MEG_5794|Multi-compound|Drug_and_biocide_resistance|Drug_and_biocide_MATE_efflux_pumps|PMPM	99.371	477	3	0	1	477	1	477	0	936	477	477	PMPM	Multi-compound	Drug_and_biocide_resistance	Drug_and_biocide_MATE_efflux_pumps
330_bin.15_g__Pseudomonas	ICHJHFDL_03283	MEG_3049|Metals|Multi-metal_resistance|Multi-metal_resistance_protein|FPTA	100	720	0	0	1	720	1	720	0	1470	720	720	FPTA	Metals	Multi-metal_resistance	Multi-metal_resistance_protein
330_bin.15_g__Pseudomonas	ICHJHFDL_00602	MEG_5716|Drugs|betalactams|Class_C_betalactamases|PDC	99.244	397	3	0	1	397	1	397	0	801	397	397	PDC	Drugs	betalactams	Class_C_betalactamases
330_bin.15_g__Pseudomonas	ICHJHFDL_03374	MEG_4377|Multi-compound|Biocide_and_metal_resistance|Biocide_and_metal_resistance_protein|OSCA	84.483	58	9	0	1	58	1	58	4e-31	100	60	60	OSCA	Multi-compound	Biocide_and_metal_resistance	Biocide_and_metal_resistance_protein
330_bin.15_g__Pseudomonas	ICHJHFDL_03418	MEG_8686|Multi-compound|Drug_and_biocide_resistance|Drug_and_biocide_RND_efflux_pumps|RSMA	100	61	0	0	1	61	1	61	6.83e-40	122	61	61	RSMA	Multi-compound	Drug_and_biocide_resistance	Drug_and_biocide_RND_efflux_pumps
330_bin.15_g__Pseudomonas	ICHJHFDL_03437	MEG_1198|Drugs|Cationic_antimicrobial_peptides|Polymyxin_B_resistance_regulator|BASRS	99.161	477	4	0	1	477	1	477	0	938	477	477	BASRS	Drugs	Cationic_antimicrobial_peptides	Polymyxin_B_resistance_regulator
330_bin.15_g__Pseudomonas	ICHJHFDL_03630	MEG_2731|Drugs|Multi-drug_resistance|Multi-drug_SMR_efflux_regulator|EMRE	100	110	0	0	1	110	1	110	1.26e-71	206	110	110	EMRE	Drugs	Multi-drug_resistance	Multi-drug_SMR_efflux_regulator
330_bin.15_g__Pseudomonas	ICHJHFDL_03679	MEG_4100|Drugs|Multi-drug_resistance|Multi-drug_RND_efflux_pumps|MUXA	99.765	426	1	0	1	426	1	426	0	846	426	426	MUXA	Drugs	Multi-drug_resistance	Multi-drug_RND_efflux_pumps
330_bin.15_g__Pseudomonas	ICHJHFDL_04035	MEG_6547|Multi-compound|Drug_and_biocide_resistance|Drug_and_biocide_ABC_efflux_regulator|SOXR	100	156	0	0	1	156	1	156	8.04e-113	314	156	156	SOXR	Multi-compound	Drug_and_biocide_resistance	Drug_and_biocide_ABC_efflux_regulator
330_bin.15_g__Pseudomonas	ICHJHFDL_04184	MEG_6154|Metals|Multi-metal_resistance|Multi-metal_resistance_protein|RUVBM	100	352	0	0	1	352	1	352	0	697	352	352	RUVBM	Metals	Multi-metal_resistance	Multi-metal_resistance_protein
330_bin.15_g__Pseudomonas	ICHJHFDL_04211	MEG_2996|Drugs|Fosfomycin|Fosfomycin_thiol_transferases|FOSA	100	135	0	0	1	135	1	135	3.1e-97	273	135	135	FOSA	Drugs	Fosfomycin	Fosfomycin_thiol_transferases
330_bin.15_g__Pseudomonas	ICHJHFDL_04332	MEG_2117|Multi-compound|Drug_and_biocide_resistance|Drug_and_biocide_RND_efflux_regulator|CPXAR	100	225	0	0	1	225	1	225	1.67e-160	441	225	225	CPXAR	Multi-compound	Drug_and_biocide_resistance	Drug_and_biocide_RND_efflux_regulator
330_bin.15_g__Pseudomonas	ICHJHFDL_04368	MEG_7837|Biocides|Multi-biocide_resistance|Multi-biocide_resistance_protein|YJCG	80	550	109	1	2	551	1	549	0	872	551	549	YJCG	Biocides	Multi-biocide_resistance	Multi-biocide_resistance_protein
330_bin.15_g__Pseudomonas	ICHJHFDL_04431	MEG_1212|Multi-compound|Drug_and_biocide_resistance|Drug_and_biocide_MFS_efflux_pumps|BCR1	99.502	402	2	0	1	402	1	402	0	752	402	402	BCR1	Multi-compound	Drug_and_biocide_resistance	Drug_and_biocide_MFS_efflux_pumps
330_bin.11_s__Staphylococcus_hominis	OADHDGDI_01053	MEG_3778|Drugs|betalactams|Penicillin_binding_protein|MECA	99.671	304	1	0	1	304	282	585	0	630	304	585	MECA	Drugs	betalactams	Penicillin_binding_protein
330_bin.15_g__Pseudomonas	ICHJHFDL_04588	MEG_4302|Multi-compound|Drug_and_biocide_resistance|Drug_and_biocide_RND_efflux_pumps|OPRN	99.788	472	1	0	1	472	1	472	0	918	472	472	OPRN	Multi-compound	Drug_and_biocide_resistance	Drug_and_biocide_RND_efflux_pumps
330_bin.15_g__Pseudomonas	ICHJHFDL_04704	MEG_4293|Drugs|Multi-drug_resistance|Multi-drug_RND_efflux_pumps|OPMD	99.589	487	2	0	1	487	1	487	0	947	487	487	OPMD	Drugs	Multi-drug_resistance	Multi-drug_RND_efflux_pumps
330_bin.15_g__Pseudomonas	ICHJHFDL_04705	MEG_3915|Multi-compound|Drug_and_biocide_resistance|Drug_and_biocide_RND_efflux_pumps|MEXI	99.903	1029	1	0	1	1029	1	1029	0	2057	1029	1029	MEXI	Multi-compound	Drug_and_biocide_resistance	Drug_and_biocide_RND_efflux_pumps
330_bin.11_s__Staphylococcus_hominis	OADHDGDI_01052	MEG_3804|Drugs|betalactams|Penicillin_binding_protein_regulator|MECI	100	123	0	0	1	123	1	123	3.09e-86	244	123	123	MECI	Drugs	betalactams	Penicillin_binding_protein_regulator
330_bin.15_g__Pseudomonas	ICHJHFDL_04707	MEG_3913|Multi-compound|Drug_and_biocide_resistance|Drug_and_biocide_RND_efflux_pumps|MEXG	100	148	0	0	1	148	1	148	8.46e-104	291	148	148	MEXG	Multi-compound	Drug_and_biocide_resistance	Drug_and_biocide_RND_efflux_pumps
330_bin.15_g__Pseudomonas	ICHJHFDL_04946	MEG_3919|Multi-compound|Drug_and_biocide_resistance|Drug_and_biocide_RND_efflux_pumps|MEXN	99.517	1036	5	0	1	1036	1	1036	0	2052	1036	1036	MEXN	Multi-compound	Drug_and_biocide_resistance	Drug_and_biocide_RND_efflux_pumps
330_bin.15_g__Pseudomonas	ICHJHFDL_04947	MEG_3920|Multi-compound|Drug_and_biocide_resistance|Drug_and_biocide_RND_efflux_pumps|MEXN	98.961	385	4	0	1	385	1	385	0	737	385	385	MEXN	Multi-compound	Drug_and_biocide_resistance	Drug_and_biocide_RND_efflux_pumps
330_bin.15_g__Pseudomonas	ICHJHFDL_05031	MEG_3922|Multi-compound|Drug_and_biocide_resistance|Drug_and_biocide_RND_efflux_pumps|MEXQ	99.481	385	2	0	1	385	1	385	0	753	385	385	MEXQ	Multi-compound	Drug_and_biocide_resistance	Drug_and_biocide_RND_efflux_pumps
330_bin.15_g__Pseudomonas	ICHJHFDL_05032	MEG_3921|Multi-compound|Drug_and_biocide_resistance|Drug_and_biocide_RND_efflux_pumps|MEXQ	99.335	1053	7	0	1	1053	1	1053	0	2077	1053	1053	MEXQ	Multi-compound	Drug_and_biocide_resistance	Drug_and_biocide_RND_efflux_pumps
330_bin.15_g__Pseudomonas	ICHJHFDL_05033	MEG_3923|Multi-compound|Drug_and_biocide_resistance|Drug_and_biocide_RND_efflux_pumps|MEXQ	99.593	491	2	0	1	491	1	491	0	949	491	491	MEXQ	Multi-compound	Drug_and_biocide_resistance	Drug_and_biocide_RND_efflux_pumps
330_bin.15_g__Pseudomonas	ICHJHFDL_05052	MEG_7275|Biocides|Phenolic_compound_resistance|Phenolic_RND_efflux_pump|TRIC	99.901	1015	1	0	1	1015	1	1015	0	2050	1015	1015	TRIC	Biocides	Phenolic_compound_resistance	Phenolic_RND_efflux_pump
330_bin.15_g__Pseudomonas	ICHJHFDL_05053	MEG_7273|Biocides|Phenolic_compound_resistance|Phenolic_RND_efflux_pump|TRIB	99.719	356	1	0	1	356	1	356	0	696	356	356	TRIB	Biocides	Phenolic_compound_resistance	Phenolic_RND_efflux_pump
330_bin.15_g__Pseudomonas	ICHJHFDL_05054	MEG_7271|Biocides|Phenolic_compound_resistance|Phenolic_RND_efflux_pump|TRIA	98.365	367	6	0	1	367	17	383	0	715	367	383	TRIA	Biocides	Phenolic_compound_resistance	Phenolic_RND_efflux_pump
330_bin.15_g__Pseudomonas	ICHJHFDL_05159	MEG_7830|Multi-compound|Biocide_and_metal_resistance|Biocide_and_metal_resistance_protein|YGIW	99.138	116	1	0	1	116	1	116	1.54e-79	227	116	116	YGIW	Multi-compound	Biocide_and_metal_resistance	Biocide_and_metal_resistance_protein
330_bin.15_g__Pseudomonas	ICHJHFDL_05451	MEG_3909|Multi-compound|Drug_and_biocide_resistance|Drug_and_biocide_RND_efflux_pumps|MEXE	99.275	414	3	0	1	414	1	414	0	828	414	414	MEXE	Multi-compound	Drug_and_biocide_resistance	Drug_and_biocide_RND_efflux_pumps
330_bin.15_g__Pseudomonas	ICHJHFDL_05517	MEG_6153|Multi-compound|Biocide_and_metal_resistance|Biocide_and_metal_resistance_protein|RUVB	85.714	196	28	0	1	196	202	397	3.57e-121	347	221	397	RUVB	Multi-compound	Biocide_and_metal_resistance	Biocide_and_metal_resistance_protein
330_bin.15_g__Pseudomonas	ICHJHFDL_05685	MEG_3936|Biocides|Multi-biocide_resistance|Multi-biocide_RND_efflux_pump|MEXW	99.804	1018	2	0	1	1018	1	1018	0	2047	1018	1018	MEXW	Biocides	Multi-biocide_resistance	Multi-biocide_RND_efflux_pump
330_bin.15_g__Pseudomonas	ICHJHFDL_05686	MEG_3935|Biocides|Multi-biocide_resistance|Multi-biocide_RND_efflux_pump|MEXV	98.936	376	4	0	1	376	1	376	0	741	376	376	MEXV	Biocides	Multi-biocide_resistance	Multi-biocide_RND_efflux_pump
330_bin.15_g__Pseudomonas	ICHJHFDL_05694	MEG_6546|Biocides|Peroxide_resistance|peroxide_resistance_protein|SODB	100	193	0	0	1	193	1	193	6.75e-145	398	193	193	SODB	Biocides	Peroxide_resistance	peroxide_resistance_protein
330_bin.15_g__Pseudomonas	ICHJHFDL_00903	MEG_4294|Drugs|Multi-drug_resistance|Multi-drug_RND_efflux_pumps|OPMH	100	482	0	0	1	482	1	482	0	967	482	482	OPMH	Drugs	Multi-drug_resistance	Multi-drug_RND_efflux_pumps
330_bin.15_g__Pseudomonas	ICHJHFDL_01001	MEG_1122|Drugs|Cationic_antimicrobial_peptides|Polymyxin_B_resistance_regulator|ARNA	95.238	168	8	0	1	168	495	662	7.81e-111	327	168	662	ARNA	Drugs	Cationic_antimicrobial_peptides	Polymyxin_B_resistance_regulator
330_bin.15_g__Pseudomonas	ICHJHFDL_01191	MEG_8035|Drugs|Lipopeptides|Colistin_phosphoethanolamine_transferase|CPRR	100	223	0	0	1	223	1	223	1.77e-165	453	223	223	CPRR	Drugs	Lipopeptides	Colistin_phosphoethanolamine_transferase
330_bin.15_g__Pseudomonas	ICHJHFDL_01192	MEG_8036|Drugs|Lipopeptides|Colistin_phosphoethanolamine_transferase|CPRS	99.768	431	1	0	1	431	1	431	0	870	431	431	CPRS	Drugs	Lipopeptides	Colistin_phosphoethanolamine_transferase
330_bin.15_g__Pseudomonas	ICHJHFDL_01349	MEG_3927|Multi-compound|Drug_and_biocide_resistance|Drug_and_biocide_RND_efflux_regulator|MEXR	100	147	0	0	1	147	1	147	2.26e-106	297	147	147	MEXR	Multi-compound	Drug_and_biocide_resistance	Drug_and_biocide_RND_efflux_regulator
330_bin.15_g__Pseudomonas	ICHJHFDL_01350	MEG_3899|Multi-compound|Drug_and_biocide_resistance|Drug_and_biocide_RND_efflux_pumps|MEXA	100	383	0	0	1	383	1	383	0	768	383	383	MEXA	Multi-compound	Drug_and_biocide_resistance	Drug_and_biocide_RND_efflux_pumps
330_bin.15_g__Pseudomonas	ICHJHFDL_01351	MEG_3903|Multi-compound|Drug_and_biocide_resistance|Drug_and_biocide_RND_efflux_pumps|MEXB	99.713	1046	3	0	1	1046	1	1046	0	2115	1046	1046	MEXB	Multi-compound	Drug_and_biocide_resistance	Drug_and_biocide_RND_efflux_pumps
330_bin.15_g__Pseudomonas	ICHJHFDL_01352	MEG_4300|Biocides|Multi-biocide_resistance|Multi-biocide_RND_efflux_pump|OPRM	100	485	0	0	1	485	1	485	0	963	485	485	OPRM	Biocides	Multi-biocide_resistance	Multi-biocide_RND_efflux_pump
330_bin.15_g__Pseudomonas	ICHJHFDL_01385	MEG_3917|Multi-compound|Drug_and_biocide_resistance|Drug_and_biocide_RND_efflux_pumps|MEXK	99.902	1025	1	0	1	1025	1	1025	0	2061	1025	1025	MEXK	Multi-compound	Drug_and_biocide_resistance	Drug_and_biocide_RND_efflux_pumps
330_bin.15_g__Pseudomonas	ICHJHFDL_01386	MEG_3916|Multi-compound|Drug_and_biocide_resistance|Drug_and_biocide_RND_efflux_pumps|MEXJ	99.728	367	1	0	1	367	1	367	0	723	367	367	MEXJ	Multi-compound	Drug_and_biocide_resistance	Drug_and_biocide_RND_efflux_pumps
330_bin.15_g__Pseudomonas	ICHJHFDL_01387	MEG_3918|Multi-compound|Drug_and_biocide_resistance|Drug_and_biocide_RND_efflux_regulator|MEXL	100	212	0	0	1	212	1	212	4.51e-156	428	212	212	MEXL	Multi-compound	Drug_and_biocide_resistance	Drug_and_biocide_RND_efflux_regulator
330_bin.15_g__Pseudomonas	ICHJHFDL_01451	MEG_6053|Metals|Multi-metal_resistance|Multi-metal_resistance_protein|RECGM	100	691	0	0	1	691	1	691	0	1385	691	691	RECGM	Metals	Multi-metal_resistance	Multi-metal_resistance_protein
330_bin.15_g__Pseudomonas	ICHJHFDL_01584	MEG_1557|Drugs|Phenicol|Chloramphenicol_acetyltransferases|CAT	98.585	212	3	0	1	212	1	212	4.88e-160	438	212	212	CAT	Drugs	Phenicol	Chloramphenicol_acetyltransferases
330_bin.15_g__Pseudomonas	ICHJHFDL_01698	MEG_6541|Biocides|Peroxide_resistance|peroxide_resistance_protein|SODA	99.507	203	1	0	1	203	1	203	4.25e-152	417	203	203	SODA	Biocides	Peroxide_resistance	peroxide_resistance_protein
330_bin.19_o__Cyanobacteriales	ADAOIOAJ_06381	MEG_1168|Biocides|Naphthoquinone|Naphthoquinone_resistance_protein|ARSHN	87.374	198	25	0	3	200	4	201	5.29e-133	370	221	206	ARSHN	Biocides	Naphthoquinone	Naphthoquinone_resistance_protein
330_bin.7_g__Acinetobacter	HLGBIKOJ_01985	MEG_678|Multi-compound|Drug_and_biocide_resistance|Drug_and_biocide_RND_efflux_pumps|ADEB	93.702	1032	65	0	2	1033	1	1032	0	1955	1036	1035	ADEB	Multi-compound	Drug_and_biocide_resistance	Drug_and_biocide_RND_efflux_pumps
330_bin.7_g__Acinetobacter	HLGBIKOJ_01986	MEG_677|Multi-compound|Drug_and_biocide_resistance|Drug_and_biocide_RND_efflux_pumps|ADEA	88.298	376	44	0	1	376	1	376	0	688	381	396	ADEA	Multi-compound	Drug_and_biocide_resistance	Drug_and_biocide_RND_efflux_pumps
330_bin.7_g__Acinetobacter	HLGBIKOJ_01987	MEG_703|Multi-compound|Drug_and_biocide_resistance|Drug_and_biocide_RND_efflux_regulator|ADER	83.402	241	40	0	1	241	1	241	4.71e-152	421	242	247	ADER	Multi-compound	Drug_and_biocide_resistance	Drug_and_biocide_RND_efflux_regulator
330_bin.7_g__Acinetobacter	HLGBIKOJ_02454	MEG_4217|Metals|Multi-metal_resistance|Multi-metal_resistance_protein|NREB	88.164	414	49	0	4	417	3	416	0	752	417	416	NREB	Metals	Multi-metal_resistance	Multi-metal_resistance_protein
316_bin.6_g__Pseudomonas_E	BDMEPDHM_01128	MEG_3912|Multi-compound|Drug_and_biocide_resistance|Drug_and_biocide_RND_efflux_pumps|MEXF	88.079	1057	124	1	1	1055	1	1057	0	1815	1063	1062	MEXF	Multi-compound	Drug_and_biocide_resistance	Drug_and_biocide_RND_efflux_pumps
330_bin.7_g__Acinetobacter	HLGBIKOJ_02627	MEG_698|Multi-compound|Drug_and_biocide_resistance|Drug_and_biocide_RND_efflux_pumps|ADEK	84.823	481	72	1	1	481	1	480	0	803	487	484	ADEK	Multi-compound	Drug_and_biocide_resistance	Drug_and_biocide_RND_efflux_pumps
330_bin.7_g__Acinetobacter	HLGBIKOJ_03164	MEG_4834|Drugs|betalactams|Class_D_betalactamases|OXA	97.491	279	7	0	1	279	2	280	0	565	279	280	OXA	Drugs	betalactams	Class_D_betalactamases
330_bin.7_g__Acinetobacter	HLGBIKOJ_00405	MEG_373|Multi-compound|Drug_and_biocide_resistance|Drug_and_biocide_MATE_efflux_pumps|ABEM	80.761	447	86	0	1	447	1	447	0	721	452	448	ABEM	Multi-compound	Drug_and_biocide_resistance	Drug_and_biocide_MATE_efflux_pumps
330_bin.7_g__Acinetobacter	HLGBIKOJ_00813	MEG_3934|Multi-compound|Drug_and_biocide_resistance|Drug_and_biocide_RND_efflux_regulator|MEXT	96.667	330	9	1	1	330	1	328	0	655	333	329	MEXT	Multi-compound	Drug_and_biocide_resistance	Drug_and_biocide_RND_efflux_regulator
330_bin.7_g__Acinetobacter	HLGBIKOJ_01183	MEG_934|Drugs|Aminoglycosides|Aminoglycoside_O-nucleotidyltransferases|ANT3-DPRIME	87.938	257	31	0	1	257	1	257	4.28e-166	457	260	259	ANT3-DPRIME	Drugs	Aminoglycosides	Aminoglycoside_O-nucleotidyltransferases
330_bin.9_g__Ochrobactrum	AJAHGDFE_00158	MEG_4054|Drugs|Cationic_antimicrobial_peptides|Defensin-resistant_mprF|MPRF	88.902	874	91	2	1	870	9	880	0	1513	870	880	MPRF	Drugs	Cationic_antimicrobial_peptides	Defensin-resistant_mprF
330_bin.9_g__Ochrobactrum	AJAHGDFE_00296	MEG_6535|Biocides|Multi-biocide_resistance|Multi-biocide_ABC_efflux_pump|SMRA	81.982	111	20	0	1	111	496	606	6.44e-56	181	117	610	SMRA	Biocides	Multi-biocide_resistance	Multi-biocide_ABC_efflux_pump
330_bin.9_g__Ochrobactrum	AJAHGDFE_00359	MEG_1224|Multi-compound|Drug_and_biocide_resistance|Drug_and_biocide_RND_efflux_pumps|BEPD	84.406	404	56	1	1	404	1	397	0	600	404	397	BEPD	Multi-compound	Drug_and_biocide_resistance	Drug_and_biocide_RND_efflux_pumps
330_bin.9_g__Ochrobactrum	AJAHGDFE_01342	MEG_4232|Drugs|betalactams|Class_C_betalactamases|OCH	82.308	390	66	1	1	387	1	390	0	659	387	390	OCH	Drugs	betalactams	Class_C_betalactamases
330_bin.9_g__Ochrobactrum	AJAHGDFE_01756	MEG_1225|Multi-compound|Drug_and_biocide_resistance|Drug_and_biocide_RND_efflux_pumps|BEPE	93.424	517	34	0	1	517	520	1036	0	973	533	1051	BEPE	Multi-compound	Drug_and_biocide_resistance	Drug_and_biocide_RND_efflux_pumps
330_bin.9_g__Ochrobactrum	AJAHGDFE_01801	MEG_8020|Drugs|Phenicol|Phenicol_resistance_MFS_efflux_pumps|CML	86.902	397	52	0	1	397	1	397	0	661	397	397	CML	Drugs	Phenicol	Phenicol_resistance_MFS_efflux_pumps
330_bin.9_g__Ochrobactrum	AJAHGDFE_02273	MEG_6507|Metals|Multi-metal_resistance|Multi-metal_RND_efflux_pumps|SILP	81.25	96	18	0	1	96	727	822	1.24e-45	153	96	824	SILP	Metals	Multi-metal_resistance	Multi-metal_RND_efflux_pumps
330_bin.9_g__Ochrobactrum	AJAHGDFE_02273	MEG_503|Metals|Copper_resistance|Copper_resistance_protein|ACTPC	82.292	96	17	0	1	96	746	841	1.25e-45	153	96	841	ACTPC	Metals	Copper_resistance	Copper_resistance_protein
330_bin.9_g__Ochrobactrum	AJAHGDFE_03891	MEG_8087|Biocides|Aldehyde_resistance|Aldehyde_degradation|FORMA	91.667	252	21	0	1	252	118	369	1.28e-177	491	252	369	FORMA	Biocides	Aldehyde_resistance	Aldehyde_degradation
330_bin.9_g__Ochrobactrum	AJAHGDFE_04336	MEG_1223|Multi-compound|Drug_and_biocide_resistance|Drug_and_biocide_RND_efflux_pumps|BEPC	82.864	426	70	2	1	426	34	456	0	697	426	456	BEPC	Multi-compound	Drug_and_biocide_resistance	Drug_and_biocide_RND_efflux_pumps
406_bin.15_s__Staphylococcus_epidermidis	HBJMBJEJ_00073	MEG_1060|Drugs|Aminoglycosides|Aminoglycoside_O-phosphotransferases|APH3-PRIME	89.734	263	27	0	2	264	4	266	0	504	264	266	APH3-PRIME	Drugs	Aminoglycosides	Aminoglycoside_O-phosphotransferases
406_bin.15_s__Staphylococcus_epidermidis	HBJMBJEJ_00720	MEG_2874|Biocides|Phenolic_compound_resistance|Phenolic_resistance_protein|FABI	87.891	256	31	0	1	256	1	256	5.35e-168	462	256	256	FABI	Biocides	Phenolic_compound_resistance	Phenolic_resistance_protein
406_bin.15_s__Staphylococcus_epidermidis	HBJMBJEJ_01890	MEG_5772|Biocides|Peroxide_resistance|peroxide_resistance_regulator|PERR	89.189	148	16	0	1	148	1	148	1.37e-101	285	150	148	PERR	Biocides	Peroxide_resistance	peroxide_resistance_regulator
330_bin.15_g__Pseudomonas	ICHJHFDL_04587	MEG_3912|Multi-compound|Drug_and_biocide_resistance|Drug_and_biocide_RND_efflux_pumps|MEXF	99.618	262	1	0	1	262	801	1062	0	531	262	1062	MEXF	Multi-compound	Drug_and_biocide_resistance	Drug_and_biocide_RND_efflux_pumps
406_bin.15_s__Staphylococcus_epidermidis	HBJMBJEJ_01301	MEG_3943|Drugs|Multi-drug_resistance|MDR_regulator|MGRA	94.558	147	8	0	1	147	1	147	3.79e-101	284	147	147	MGRA	Drugs	Multi-drug_resistance	MDR_regulator
406_bin.15_s__Staphylococcus_epidermidis	HBJMBJEJ_01114	MEG_2992|Drugs|Fosfomycin|Fosfomycin_thiol_transferases|FOSA	97.887	142	3	0	1	142	1	142	2.73e-104	291	142	142	FOSA	Drugs	Fosfomycin	Fosfomycin_thiol_transferases
406_bin.15_s__Staphylococcus_epidermidis	HBJMBJEJ_01114	MEG_3007|Drugs|Fosfomycin|Fosfomycin_thiol_transferases|FOSB	97.887	142	3	0	1	142	1	142	3.25e-104	291	142	142	FOSB	Drugs	Fosfomycin	Fosfomycin_thiol_transferases
406_bin.15_s__Staphylococcus_epidermidis	HBJMBJEJ_01752	MEG_1486|Metals|Multi-metal_resistance|Multi-metal_resistance_protein|CADD	93.171	205	14	0	1	205	1	205	3.4e-138	382	205	205	CADD	Metals	Multi-metal_resistance	Multi-metal_resistance_protein
406_bin.15_s__Staphylococcus_epidermidis	HBJMBJEJ_01187	MEG_1150|Metals|Multi-metal_resistance|Multi-metal_resistance_protein|ARSBM	89.977	429	43	0	2	430	1	429	0	755	430	429	ARSBM	Metals	Multi-metal_resistance	Multi-metal_resistance_protein
406_bin.15_s__Staphylococcus_epidermidis	HBJMBJEJ_01188	MEG_1154|Metals|Arsenic_resistance|Arsenic_resistance_protein|ARSC	87.023	131	17	0	1	131	1	131	3.18e-84	240	131	131	ARSC	Metals	Arsenic_resistance	Arsenic_resistance_protein
406_bin.15_s__Staphylococcus_epidermidis	HBJMBJEJ_01847	MEG_1117|Drugs|Multi-drug_resistance|MDR_regulator|ARLR	84.475	219	34	0	1	219	1	219	6.36e-137	380	219	219	ARLR	Drugs	Multi-drug_resistance	MDR_regulator
406_bin.17_g__Lachnoanaerobaculum	PNLJDIML_00954	MEG_3647|Drugs|Multi-drug_resistance|Multi-drug_ABC_efflux_pumps|LSAC	92.391	92	7	0	1	92	401	492	4.17e-56	178	92	492	LSAC	Drugs	Multi-drug_resistance	Multi-drug_ABC_efflux_pumps
406_bin.2_g__Prevotella	JKJAADLL_01571	MEG_3610|Drugs|MLS|Lincosamide_nucleotidyltransferases|LNUC	98.171	164	3	0	24	187	1	164	5.2e-120	334	187	164	LNUC	Drugs	MLS	Lincosamide_nucleotidyltransferases
406_bin.3_g__Pseudomonas_E	GLEGJNGO_01248	MEG_3912|Multi-compound|Drug_and_biocide_resistance|Drug_and_biocide_RND_efflux_pumps|MEXF	88.327	257	30	0	1	257	801	1057	1.62e-158	466	265	1062	MEXF	Multi-compound	Drug_and_biocide_resistance	Drug_and_biocide_RND_efflux_pumps
406_bin.31_s__Neisseria_elongata	IBHPHHMF_00191	MEG_3657|Drugs|Multi-drug_resistance|Multi-drug_ABC_efflux_pumps|MACA	81.888	392	70	1	2	393	1	391	0	621	393	392	MACA	Drugs	Multi-drug_resistance	Multi-drug_ABC_efflux_pumps
406_bin.31_s__Neisseria_elongata	IBHPHHMF_00982	MEG_6633|Drugs|Sulfonamides|Sulfonamide-resistant_dihydropteroate_synthases|SULII	100	271	0	0	1	271	1	271	0	529	271	283	SULII	Drugs	Sulfonamides	Sulfonamide-resistant_dihydropteroate_synthases
406_bin.31_s__Neisseria_elongata	IBHPHHMF_00982	MEG_6582|Drugs|Sulfonamides|Sulfonamide-resistant_dihydropteroate_synthases|SULI	99.631	271	1	0	1	271	1	271	0	526	271	271	SULI	Drugs	Sulfonamides	Sulfonamide-resistant_dihydropteroate_synthases
406_bin.3_g__Pseudomonas_E	GLEGJNGO_00222	MEG_3936|Biocides|Multi-biocide_resistance|Multi-biocide_RND_efflux_pump|MEXW	82.828	297	49	1	1	295	717	1013	6.56e-171	498	295	1018	MEXW	Biocides	Multi-biocide_resistance	Multi-biocide_RND_efflux_pump
406_bin.3_g__Pseudomonas_E	GLEGJNGO_00344	MEG_2717|Multi-compound|Drug_and_biocide_resistance|Drug_and_biocide_RND_efflux_pumps|EMHC	88.889	81	9	0	1	81	406	486	1.35e-44	147	81	486	EMHC	Multi-compound	Drug_and_biocide_resistance	Drug_and_biocide_RND_efflux_pumps
406_bin.3_g__Pseudomonas_E	GLEGJNGO_00912	MEG_2715|Biocides|Multi-biocide_resistance|Multi-biocide_RND_efflux_pump|EMHA	92.208	385	30	0	1	385	1	385	0	691	385	385	EMHA	Biocides	Multi-biocide_resistance	Multi-biocide_RND_efflux_pump
406_bin.3_g__Pseudomonas_E	GLEGJNGO_00912	MEG_7287|Multi-compound|Drug_and_biocide_resistance|Drug_and_biocide_RND_efflux_pumps|TTGA	80.323	371	71	1	1	371	1	369	0	591	385	384	TTGA	Multi-compound	Drug_and_biocide_resistance	Drug_and_biocide_RND_efflux_pumps
406_bin.3_g__Pseudomonas_E	GLEGJNGO_01184	MEG_2439|Metals|Multi-metal_resistance|Multi-metal_resistance_protein|CUEA	92.221	797	62	0	1	797	1	797	0	1484	797	797	CUEA	Metals	Multi-metal_resistance	Multi-metal_resistance_protein
406_bin.3_g__Pseudomonas_E	GLEGJNGO_01205	MEG_2117|Multi-compound|Drug_and_biocide_resistance|Drug_and_biocide_RND_efflux_regulator|CPXAR	81.25	224	42	0	1	224	1	224	1.1e-130	365	225	225	CPXAR	Multi-compound	Drug_and_biocide_resistance	Drug_and_biocide_RND_efflux_regulator
817_bin.24_g__Pseudomonas_E	CLJEDNKM_02274	MEG_3912|Multi-compound|Drug_and_biocide_resistance|Drug_and_biocide_RND_efflux_pumps|MEXF	86.911	1062	136	1	1	1059	1	1062	0	1800	1059	1062	MEXF	Multi-compound	Drug_and_biocide_resistance	Drug_and_biocide_RND_efflux_pumps
406_bin.3_g__Pseudomonas_E	GLEGJNGO_01384	MEG_3917|Multi-compound|Drug_and_biocide_resistance|Drug_and_biocide_RND_efflux_pumps|MEXK	87.124	233	30	0	1	233	789	1021	2.92e-137	408	234	1025	MEXK	Multi-compound	Drug_and_biocide_resistance	Drug_and_biocide_RND_efflux_pumps
406_bin.3_g__Pseudomonas_E	GLEGJNGO_01631	MEG_6154|Metals|Multi-metal_resistance|Multi-metal_resistance_protein|RUVBM	85.879	347	48	1	1	347	1	346	0	589	353	352	RUVBM	Metals	Multi-metal_resistance	Multi-metal_resistance_protein
406_bin.3_g__Pseudomonas_E	GLEGJNGO_02526	MEG_2716|Biocides|Multi-biocide_resistance|Multi-biocide_RND_efflux_pump|EMHB	91.152	599	53	0	1	599	456	1054	0	1145	599	1054	EMHB	Biocides	Multi-biocide_resistance	Multi-biocide_RND_efflux_pump
406_bin.3_g__Pseudomonas_E	GLEGJNGO_02526	MEG_7288|Multi-compound|Drug_and_biocide_resistance|Drug_and_biocide_RND_efflux_pumps|TTGB	83	600	96	2	1	599	456	1050	0	1032	599	1050	TTGB	Multi-compound	Drug_and_biocide_resistance	Drug_and_biocide_RND_efflux_pumps
406_bin.3_g__Pseudomonas_E	GLEGJNGO_02713	MEG_6053|Metals|Multi-metal_resistance|Multi-metal_resistance_protein|RECGM	82.166	157	28	0	1	157	1	157	4.2e-88	269	168	691	RECGM	Metals	Multi-metal_resistance	Multi-metal_resistance_protein
406_bin.3_g__Pseudomonas_E	GLEGJNGO_02921	MEG_2719|Biocides|Multi-biocide_resistance|Multi-biocide_RND_efflux_regulator|EMHR	87.081	209	27	0	1	209	1	209	2.05e-138	384	210	210	EMHR	Biocides	Multi-biocide_resistance	Multi-biocide_RND_efflux_regulator
406_bin.3_g__Pseudomonas_E	GLEGJNGO_02997	MEG_6153|Multi-compound|Biocide_and_metal_resistance|Biocide_and_metal_resistance_protein|RUVB	96.474	397	14	0	1	397	1	397	0	774	422	397	RUVB	Multi-compound	Biocide_and_metal_resistance	Biocide_and_metal_resistance_protein
406_bin.3_g__Pseudomonas_E	GLEGJNGO_03164	MEG_8741|Multi-compound|Drug_and_biocide_resistance|Drug_and_biocide_RND_efflux_regulator|YAJC	85.714	112	16	0	1	112	1	112	5.14e-55	165	112	112	YAJC	Multi-compound	Drug_and_biocide_resistance	Drug_and_biocide_RND_efflux_regulator
406_bin.3_g__Pseudomonas_E	GLEGJNGO_04415	MEG_3908|Multi-compound|Drug_and_biocide_resistance|Drug_and_biocide_RND_efflux_pumps|MEXE	80.861	418	74	2	1	417	1	413	0	684	417	413	MEXE	Multi-compound	Drug_and_biocide_resistance	Drug_and_biocide_RND_efflux_pumps
406_bin.4_g__Granulicatella	JBDAILIH_00803	MEG_1485|Metals|Multi-metal_resistance|Multi-metal_resistance_regulator|CADC	83.607	122	20	0	1	122	1	122	3.52e-73	211	122	122	CADC	Metals	Multi-metal_resistance	Multi-metal_resistance_regulator
406_bin.4_g__Granulicatella	JBDAILIH_01533	MEG_7054|Drugs|Tetracyclines|Tetracycline_resistance_ABC_efflux_pumps|TETB60	91.883	579	47	0	1	579	1	579	0	1099	579	579	TETB60	Drugs	Tetracyclines	Tetracycline_resistance_ABC_efflux_pumps
406_bin.4_g__Granulicatella	JBDAILIH_01534	MEG_7036|Drugs|Tetracyclines|Tetracycline_resistance_ABC_efflux_pumps|TETA60	94.646	579	31	0	1	579	1	579	0	1129	579	579	TETA60	Drugs	Tetracyclines	Tetracycline_resistance_ABC_efflux_pumps
330_bin.15_g__Pseudomonas	ICHJHFDL_04706	MEG_3914|Multi-compound|Drug_and_biocide_resistance|Drug_and_biocide_RND_efflux_pumps|MEXH	99.73	370	1	0	1	370	1	370	0	729	370	370	MEXH	Multi-compound	Drug_and_biocide_resistance	Drug_and_biocide_RND_efflux_pumps
406_bin.8_s__Gemella_sanguinis	IGLEOEFN_00708	MEG_5856|Multi-compound|Drug_and_biocide_resistance|Drug_and_biocide_MFS_efflux_regulator|QACR	99.468	188	1	0	1	188	1	188	2.35e-134	371	188	188	QACR	Multi-compound	Drug_and_biocide_resistance	Drug_and_biocide_MFS_efflux_regulator
406_bin.15_s__Staphylococcus_epidermidis	HBJMBJEJ_01293	MEG_4208|Multi-compound|Drug_and_biocide_resistance|Drug_and_biocide_MFS_efflux_pumps|NORA	100	387	0	0	29	415	1	387	0	758	415	387	NORA	Multi-compound	Drug_and_biocide_resistance	Drug_and_biocide_MFS_efflux_pumps
406_bin.8_s__Gemella_sanguinis	IGLEOEFN_00703	MEG_4038|Drugs|MLS|Macrolide_phosphotransferases|MPHC	100	299	0	0	1	299	1	299	0	620	299	299	MPHC	Drugs	MLS	Macrolide_phosphotransferases
406_bin.9_g__Gemella*	GCONAFJP_00627	MEG_1488|Metals|Multi-metal_resistance|Multi-metal_resistance_regulator|CADX	92.857	112	8	0	1	112	1	112	3.08e-74	213	112	112	CADX	Metals	Multi-metal_resistance	Multi-metal_resistance_regulator
413_bin.16_g__Moraxella_A	GGOIKKIN_00031	MEG_8087|Biocides|Aldehyde_resistance|Aldehyde_degradation|FORMA	84.282	369	58	0	17	385	1	369	0	640	385	369	FORMA	Biocides	Aldehyde_resistance	Aldehyde_degradation
413_bin.16_g__Moraxella_A	GGOIKKIN_01138	MEG_3293|Drugs|Lipopeptides|Colistin_phosphoethanolamine_transferase|ICR	94.849	563	14	1	1	563	11	558	0	1106	563	558	ICR	Drugs	Lipopeptides	Colistin_phosphoethanolamine_transferase
413_bin.18_g__Kaistella	IAFDDDCI_00276	MEG_8661|Drugs|Aminoglycosides|Aminoglycoside_efflux_pumps|RANB	83.065	248	42	0	3	250	6	253	3.76e-148	412	250	253	RANB	Drugs	Aminoglycosides	Aminoglycoside_efflux_pumps
427_bin.30_s__Comamonas_denitrificans_A	GKIKKPPD_00659	MEG_8087|Biocides|Aldehyde_resistance|Aldehyde_degradation|FORMA	82.129	263	47	0	1	263	107	369	2e-167	466	273	369	FORMA	Biocides	Aldehyde_resistance	Aldehyde_degradation
427_bin.30_s__Comamonas_denitrificans_A	GKIKKPPD_00802	MEG_5814|Metals|Arsenic_resistance|Arsenic_resistance_protein|PSTB	81.048	248	47	0	16	263	10	257	1.63e-158	438	263	257	PSTB	Metals	Arsenic_resistance	Arsenic_resistance_protein
427_bin.3_s__Xanthomonas_campestris	DBCDEOJH_00128	MEG_3133|Multi-compound|Drug_and_biocide_and_metal_resistance|Drug_and_biocide_and_metal_RND_efflux_pumps|GESB	80.038	1047	209	0	1	1047	1	1047	0	1684	1058	1055	GESB	Multi-compound	Drug_and_biocide_and_metal_resistance	Drug_and_biocide_and_metal_RND_efflux_pumps
427_bin.3_s__Xanthomonas_campestris	DBCDEOJH_01548	MEG_6535|Biocides|Multi-biocide_resistance|Multi-biocide_ABC_efflux_pump|SMRA	82.594	609	106	0	1	609	1	609	0	1004	610	610	SMRA	Biocides	Multi-biocide_resistance	Multi-biocide_ABC_efflux_pump
427_bin.3_s__Xanthomonas_campestris	DBCDEOJH_02930	MEG_8087|Biocides|Aldehyde_resistance|Aldehyde_degradation|FORMA	82.927	369	63	0	1	369	1	369	0	620	369	369	FORMA	Biocides	Aldehyde_resistance	Aldehyde_degradation
427_bin.3_s__Xanthomonas_campestris	DBCDEOJH_03565	MEG_2726|Multi-compound|Drug_and_biocide_resistance|Drug_and_biocide_MFS_efflux_pumps|EMRBSM	88.687	495	56	0	19	513	22	516	0	899	526	528	EMRBSM	Multi-compound	Drug_and_biocide_resistance	Drug_and_biocide_MFS_efflux_pumps
427_bin.4_g__Pseudomonas_E	DNIPJFIP_00234	MEG_2022|Metals|Copper_resistance|Copper_resistance_protein|COPA	80	470	94	0	1	470	1	470	0	777	470	470	COPA	Metals	Copper_resistance	Copper_resistance_protein
427_bin.4_g__Pseudomonas_E	DNIPJFIP_00498	MEG_2471|Metals|Multi-metal_resistance|Multi-metal_RND_efflux_pumps|CZCP	81.443	194	36	0	1	194	634	827	5.65e-105	317	194	829	CZCP	Metals	Multi-metal_resistance	Multi-metal_RND_efflux_pumps
427_bin.4_g__Pseudomonas_E	DNIPJFIP_00948	MEG_6154|Metals|Multi-metal_resistance|Multi-metal_resistance_protein|RUVBM	80.769	78	15	0	1	78	273	350	1.28e-41	136	79	352	RUVBM	Metals	Multi-metal_resistance	Multi-metal_resistance_protein
427_bin.4_g__Pseudomonas_E	DNIPJFIP_00959	MEG_5814|Metals|Arsenic_resistance|Arsenic_resistance_protein|PSTB	80.435	46	9	0	1	46	212	257	1.78e-22	83.2	46	257	PSTB	Metals	Arsenic_resistance	Arsenic_resistance_protein
427_bin.4_g__Pseudomonas_E	DNIPJFIP_01845	MEG_8721|Drugs|Multi-drug_resistance|Multi-drug_RND_efflux_pumps|TOPR	88.387	465	53	1	1	464	1	465	0	798	466	477	TOPR	Drugs	Multi-drug_resistance	Multi-drug_RND_efflux_pumps
427_bin.4_g__Pseudomonas_E	DNIPJFIP_01846	MEG_8248|Multi-compound|Drug_and_biocide_resistance|Drug_and_biocide_RND_efflux_pumps|MEXD1	100	73	0	0	1	73	972	1044	3e-44	149	73	1044	MEXD1	Multi-compound	Drug_and_biocide_resistance	Drug_and_biocide_RND_efflux_pumps
427_bin.4_g__Pseudomonas_E	DNIPJFIP_01846	MEG_3907|Multi-compound|Drug_and_biocide_resistance|Drug_and_biocide_RND_efflux_pumps|MEXD	81.967	61	11	0	1	61	972	1032	5.25e-22	85.5	73	1043	MEXD	Multi-compound	Drug_and_biocide_resistance	Drug_and_biocide_RND_efflux_pumps
427_bin.4_g__Pseudomonas_E	DNIPJFIP_02309	MEG_4302|Multi-compound|Drug_and_biocide_resistance|Drug_and_biocide_RND_efflux_pumps|OPRN	84.348	115	18	0	1	115	358	472	6.21e-51	165	115	472	OPRN	Multi-compound	Drug_and_biocide_resistance	Drug_and_biocide_RND_efflux_pumps
427_bin.4_g__Pseudomonas_E	DNIPJFIP_02421	MEG_2117|Multi-compound|Drug_and_biocide_resistance|Drug_and_biocide_RND_efflux_regulator|CPXAR	81.333	225	42	0	1	225	1	225	2.62e-128	359	225	225	CPXAR	Multi-compound	Drug_and_biocide_resistance	Drug_and_biocide_RND_efflux_regulator
427_bin.4_g__Pseudomonas_E	DNIPJFIP_02930	MEG_4059|Metals|Multi-metal_resistance|Multi-metal_resistance_protein|MREA	86.316	95	13	0	1	95	1	95	2.71e-56	167	95	95	MREA	Metals	Multi-metal_resistance	Multi-metal_resistance_protein
427_bin.4_g__Pseudomonas_E	DNIPJFIP_03174	MEG_8741|Multi-compound|Drug_and_biocide_resistance|Drug_and_biocide_RND_efflux_regulator|YAJC	92.045	88	7	0	22	109	25	112	2.87e-56	168	109	112	YAJC	Multi-compound	Drug_and_biocide_resistance	Drug_and_biocide_RND_efflux_regulator
427_bin.4_g__Pseudomonas_E	DNIPJFIP_03225	MEG_8247|Drugs|Multi-drug_resistance|Multi-drug_RND_efflux_pumps|MEXC1	86.923	390	48	1	1	390	1	387	0	641	390	387	MEXC1	Drugs	Multi-drug_resistance	Multi-drug_RND_efflux_pumps
427_bin.6_g__Microcoleus	KOPIGPMG_02314	MEG_1168|Biocides|Naphthoquinone|Naphthoquinone_resistance_protein|ARSHN	83.249	197	33	0	2	198	6	202	1.95e-125	350	213	206	ARSHN	Biocides	Naphthoquinone	Naphthoquinone_resistance_protein
427_bin.9_g__Neisseria	DNEPKNAJ_00132	MEG_4084|Multi-compound|Drug_and_biocide_resistance|Drug_and_biocide_RND_efflux_pumps|MTRE	80.694	461	89	0	5	465	4	464	0	758	468	467	MTRE	Multi-compound	Drug_and_biocide_resistance	Drug_and_biocide_RND_efflux_pumps
427_bin.9_g__Neisseria	DNEPKNAJ_00133	MEG_4083|Multi-compound|Drug_and_biocide_resistance|Drug_and_biocide_RND_efflux_pumps|MTRD	85.714	420	58	1	1	420	649	1066	0	741	422	1067	MTRD	Multi-compound	Drug_and_biocide_resistance	Drug_and_biocide_RND_efflux_pumps
427_bin.9_g__Neisseria	DNEPKNAJ_00476	MEG_8087|Biocides|Aldehyde_resistance|Aldehyde_degradation|FORMA	84.282	369	58	0	10	378	1	369	0	642	378	369	FORMA	Biocides	Aldehyde_resistance	Aldehyde_degradation
427_bin.9_g__Neisseria	DNEPKNAJ_01581	MEG_4213|Drugs|Multi-drug_resistance|Multi-drug_MATE_efflux_pump|NORMD	83.945	218	35	0	2	219	242	459	2.65e-126	362	219	459	NORMD	Drugs	Multi-drug_resistance	Multi-drug_MATE_efflux_pump
427_bin.9_g__Neisseria	DNEPKNAJ_01649	MEG_4073|Drugs|MLS|MLS_resistance_ABC_efflux_pumps|MSRD	100	233	0	0	1	233	255	487	3.16e-171	478	233	487	MSRD	Drugs	MLS	MLS_resistance_ABC_efflux_pumps
427_bin.9_g__Neisseria	DNEPKNAJ_01806	MEG_2887|Multi-compound|Drug_and_biocide_resistance|Drug_and_biocide_MFS_efflux_regulator|FARR	89.583	144	15	0	1	144	1	144	3.94e-86	246	145	146	FARR	Multi-compound	Drug_and_biocide_resistance	Drug_and_biocide_MFS_efflux_regulator
511_bin.30_s__Corynebacterium_durum	PJBOGJFE_00210	MEG_2654|Metals|Copper_resistance|Copper_resistance_protein|DNAK	80.298	604	111	2	1	599	1	601	0	985	614	625	DNAK	Metals	Copper_resistance	Copper_resistance_protein
511_bin.33_s__Staphylococcus_capitis	IHEGDOEE_00036	MEG_1300|Drugs|betalactams|Penicillin_binding_protein_regulator|BLAR	90.427	585	56	0	1	585	1	585	0	1060	585	585	BLAR	Drugs	betalactams	Penicillin_binding_protein_regulator
511_bin.33_s__Staphylococcus_capitis	IHEGDOEE_00037	MEG_1287|Drugs|betalactams|Penicillin_binding_protein_regulator|BLAI	96.032	126	5	0	1	126	1	126	1.54e-80	230	126	126	BLAI	Drugs	betalactams	Penicillin_binding_protein_regulator
511_bin.33_s__Staphylococcus_capitis	IHEGDOEE_02035	MEG_1156|Metals|Arsenic_resistance|Arsenic_resistance_protein|ARSC	86.26	131	18	0	1	131	1	131	6.55e-85	242	131	131	ARSC	Metals	Arsenic_resistance	Arsenic_resistance_protein
511_bin.33_s__Staphylococcus_capitis	IHEGDOEE_00291	MEG_3943|Drugs|Multi-drug_resistance|MDR_regulator|MGRA	95.205	146	7	0	1	146	1	146	1.4e-101	285	146	147	MGRA	Drugs	Multi-drug_resistance	MDR_regulator
511_bin.33_s__Staphylococcus_capitis	IHEGDOEE_00468	MEG_1060|Drugs|Aminoglycosides|Aminoglycoside_O-phosphotransferases|APH3-PRIME	90.875	263	24	0	2	264	4	266	0	508	264	266	APH3-PRIME	Drugs	Aminoglycosides	Aminoglycoside_O-phosphotransferases
511_bin.33_s__Staphylococcus_capitis	IHEGDOEE_02036	MEG_1150|Metals|Multi-metal_resistance|Multi-metal_resistance_protein|ARSBM	85.082	429	64	0	1	429	1	429	0	726	429	429	ARSBM	Metals	Multi-metal_resistance	Multi-metal_resistance_protein
511_bin.33_s__Staphylococcus_capitis	IHEGDOEE_02065	MEG_4208|Multi-compound|Drug_and_biocide_resistance|Drug_and_biocide_MFS_efflux_pumps|NORA	89.922	387	39	0	1	387	1	387	0	703	389	387	NORA	Multi-compound	Drug_and_biocide_resistance	Drug_and_biocide_MFS_efflux_pumps
511_bin.33_s__Staphylococcus_capitis	IHEGDOEE_02174	MEG_5772|Biocides|Peroxide_resistance|peroxide_resistance_regulator|PERR	88.435	147	17	0	1	147	1	147	1.06e-101	286	151	148	PERR	Biocides	Peroxide_resistance	peroxide_resistance_regulator
511_bin.33_s__Staphylococcus_capitis	IHEGDOEE_01957	MEG_1117|Drugs|Multi-drug_resistance|MDR_regulator|ARLR	84.018	219	35	0	1	219	1	219	1.65e-136	379	219	219	ARLR	Drugs	Multi-drug_resistance	MDR_regulator
511_bin.33_s__Staphylococcus_capitis	IHEGDOEE_00971	MEG_6058|Drugs|MLS|23S_rRNA_methyltransferases|RLMH	93.082	159	11	0	1	159	1	159	9.07e-111	309	159	159	RLMH	Drugs	MLS	23S_rRNA_methyltransferases
511_bin.33_s__Staphylococcus_capitis	IHEGDOEE_01177	MEG_2874|Biocides|Phenolic_compound_resistance|Phenolic_resistance_protein|FABI	92.969	256	18	0	1	256	1	256	1.67e-176	484	256	256	FABI	Biocides	Phenolic_compound_resistance	Phenolic_resistance_protein
511_bin.52_s__Lautropia_mirabilis	ELMOKNHD_00457	MEG_8087|Biocides|Aldehyde_resistance|Aldehyde_degradation|FORMA	88.076	369	44	0	3	371	1	369	0	661	371	369	FORMA	Biocides	Aldehyde_resistance	Aldehyde_degradation
511_bin.54_g__Aggregatibacter	IKBNIBKC_00073	MEG_2888|Metals|Multi-metal_resistance|Multi-metal_ABC_efflux_pumps|FBPA	80.723	332	64	0	1	332	1	332	0	522	332	332	FBPA	Metals	Multi-metal_resistance	Multi-metal_ABC_efflux_pumps
511_bin.65_s__Mesocricetibacter_sp905373425	NFOIJKMA_00031	MEG_2888|Metals|Multi-metal_resistance|Multi-metal_ABC_efflux_pumps|FBPA	81.024	332	63	0	1	332	1	332	0	516	332	332	FBPA	Metals	Multi-metal_resistance	Multi-metal_ABC_efflux_pumps
511_bin.65_s__Mesocricetibacter_sp905373425	NFOIJKMA_00033	MEG_2889|Metals|Multi-metal_resistance|Multi-metal_ABC_efflux_pumps|FBPB	83.532	504	83	0	3	506	3	506	0	826	506	506	FBPB	Metals	Multi-metal_resistance	Multi-metal_ABC_efflux_pumps
511_bin.6_s__Staphylococcus_epidermidis	JDLMIDDD_01578	MEG_4208|Multi-compound|Drug_and_biocide_resistance|Drug_and_biocide_MFS_efflux_pumps|NORA	98.708	387	5	0	1	387	1	387	0	751	387	387	NORA	Multi-compound	Drug_and_biocide_resistance	Drug_and_biocide_MFS_efflux_pumps
511_bin.65_s__Mesocricetibacter_sp905373425	NFOIJKMA_01013	MEG_2889|Metals|Multi-metal_resistance|Multi-metal_ABC_efflux_pumps|FBPB	82.937	504	86	0	3	506	3	506	0	819	506	506	FBPB	Metals	Multi-metal_resistance	Multi-metal_ABC_efflux_pumps
511_bin.6_s__Staphylococcus_epidermidis	JDLMIDDD_00041	MEG_2992|Drugs|Fosfomycin|Fosfomycin_thiol_transferases|FOSA	95.07	142	7	0	1	142	1	142	4.11e-102	286	142	142	FOSA	Drugs	Fosfomycin	Fosfomycin_thiol_transferases
511_bin.6_s__Staphylococcus_epidermidis	JDLMIDDD_00041	MEG_3007|Drugs|Fosfomycin|Fosfomycin_thiol_transferases|FOSB	95.07	142	7	0	1	142	1	142	5.73e-101	283	142	142	FOSB	Drugs	Fosfomycin	Fosfomycin_thiol_transferases
511_bin.6_s__Staphylococcus_epidermidis	JDLMIDDD_00228	MEG_1060|Drugs|Aminoglycosides|Aminoglycoside_O-phosphotransferases|APH3-PRIME	90.494	263	25	0	2	264	4	266	0	507	264	266	APH3-PRIME	Drugs	Aminoglycosides	Aminoglycoside_O-phosphotransferases
511_bin.6_s__Staphylococcus_epidermidis	JDLMIDDD_00849	MEG_3943|Drugs|Multi-drug_resistance|MDR_regulator|MGRA	95.238	147	7	0	1	147	1	147	8.9e-102	286	147	147	MGRA	Drugs	Multi-drug_resistance	MDR_regulator
511_bin.6_s__Staphylococcus_epidermidis	JDLMIDDD_01523	MEG_1117|Drugs|Multi-drug_resistance|MDR_regulator|ARLR	84.475	219	34	0	1	219	1	219	6.36e-137	380	219	219	ARLR	Drugs	Multi-drug_resistance	MDR_regulator
511_bin.6_s__Staphylococcus_epidermidis	JDLMIDDD_00784	MEG_1154|Metals|Arsenic_resistance|Arsenic_resistance_protein|ARSC	83.206	131	22	0	1	131	1	131	6.37e-80	229	132	131	ARSC	Metals	Arsenic_resistance	Arsenic_resistance_protein
511_bin.6_s__Staphylococcus_epidermidis	JDLMIDDD_01563	MEG_2874|Biocides|Phenolic_compound_resistance|Phenolic_resistance_protein|FABI	88.281	256	30	0	1	256	1	256	3.57e-168	462	256	256	FABI	Biocides	Phenolic_compound_resistance	Phenolic_resistance_protein
330_bin.11_s__Staphylococcus_hominis	OADHDGDI_00763	MEG_5823|Multi-compound|Drug_and_biocide_resistance|Drug_and_biocide_MFS_efflux_pumps|QACAB	99.416	514	3	0	1	514	1	514	0	996	514	514	QACAB	Multi-compound	Drug_and_biocide_resistance	Drug_and_biocide_MFS_efflux_pumps
406_bin.8_s__Gemella_sanguinis	IGLEOEFN_00707	MEG_5823|Multi-compound|Drug_and_biocide_resistance|Drug_and_biocide_MFS_efflux_pumps|QACAB	99.805	514	1	0	1	514	1	514	0	1000	514	514	QACAB	Multi-compound	Drug_and_biocide_resistance	Drug_and_biocide_MFS_efflux_pumps
525_bin.10_s__Corynebacterium_glucuronolyticum	ICBHJEDO_00557	MEG_7170|Drugs|Tetracyclines|Tetracycline_resistance_ribosomal_protection_proteins|TETO	97.774	629	14	0	1	629	1	629	0	1260	639	629	TETO	Drugs	Tetracyclines	Tetracycline_resistance_ribosomal_protection_proteins
525_bin.12_g__Anaerococcus	AAEOOPLE_00078	MEG_6652|Metals|Copper_resistance|Copper_resistance_protein|TCRB	86.555	357	48	0	2	358	354	710	0	624	358	710	TCRB	Metals	Copper_resistance	Copper_resistance_protein
525_bin.20_g__Neisseria	PGMMHAMB_00077	MEG_2887|Multi-compound|Drug_and_biocide_resistance|Drug_and_biocide_MFS_efflux_regulator|FARR	88.889	144	16	0	1	144	1	144	2.15e-86	247	145	146	FARR	Multi-compound	Drug_and_biocide_resistance	Drug_and_biocide_MFS_efflux_regulator
525_bin.20_g__Neisseria	PGMMHAMB_00522	MEG_4213|Drugs|Multi-drug_resistance|Multi-drug_MATE_efflux_pump|NORMD	96.514	459	16	0	1	459	1	459	0	885	459	459	NORMD	Drugs	Multi-drug_resistance	Multi-drug_MATE_efflux_pump
525_bin.20_g__Neisseria	PGMMHAMB_00760	MEG_1486|Metals|Multi-metal_resistance|Multi-metal_resistance_protein|CADD	85.784	204	29	0	1	204	1	204	1.74e-125	350	204	205	CADD	Metals	Multi-metal_resistance	Multi-metal_resistance_protein
525_bin.20_g__Neisseria	PGMMHAMB_01240	MEG_3657|Drugs|Multi-drug_resistance|Multi-drug_ABC_efflux_pumps|MACA	81.888	392	70	1	1	392	1	391	0	622	392	392	MACA	Drugs	Multi-drug_resistance	Multi-drug_ABC_efflux_pumps
525_bin.20_g__Neisseria	PGMMHAMB_01241	MEG_3658|Drugs|Multi-drug_resistance|Multi-drug_ABC_efflux_pumps|MACB	88.682	645	72	1	1	645	1	644	0	1181	645	644	MACB	Drugs	Multi-drug_resistance	Multi-drug_ABC_efflux_pumps
525_bin.20_g__Neisseria	PGMMHAMB_01574	MEG_2886|Multi-compound|Drug_and_biocide_resistance|Drug_and_biocide_MFS_efflux_pumps|FARB	81.336	509	94	1	1	509	1	508	0	853	509	508	FARB	Multi-compound	Drug_and_biocide_resistance	Drug_and_biocide_MFS_efflux_pumps
525_bin.20_g__Neisseria	PGMMHAMB_01631	MEG_4079|Multi-compound|Drug_and_biocide_resistance|Drug_and_biocide_RND_efflux_pumps|MTRC	80.706	425	69	3	1	425	1	412	0	662	425	412	MTRC	Multi-compound	Drug_and_biocide_resistance	Drug_and_biocide_RND_efflux_pumps
525_bin.20_g__Neisseria	PGMMHAMB_01632	MEG_4083|Multi-compound|Drug_and_biocide_resistance|Drug_and_biocide_RND_efflux_pumps|MTRD	86.973	1067	137	1	1	1065	1	1067	0	1896	1070	1067	MTRD	Multi-compound	Drug_and_biocide_resistance	Drug_and_biocide_RND_efflux_pumps
525_bin.20_g__Neisseria	PGMMHAMB_01633	MEG_4084|Multi-compound|Drug_and_biocide_resistance|Drug_and_biocide_RND_efflux_pumps|MTRE	80.435	460	90	0	5	464	4	463	0	753	472	467	MTRE	Multi-compound	Drug_and_biocide_resistance	Drug_and_biocide_RND_efflux_pumps
525_bin.20_g__Neisseria	PGMMHAMB_01656	MEG_8087|Biocides|Aldehyde_resistance|Aldehyde_degradation|FORMA	83.74	369	60	0	10	378	1	369	0	639	378	369	FORMA	Biocides	Aldehyde_resistance	Aldehyde_degradation
525_bin.20_g__Neisseria	PGMMHAMB_01889	MEG_3658|Drugs|Multi-drug_resistance|Multi-drug_ABC_efflux_pumps|MACB	88.837	645	71	1	1	645	1	644	0	1189	645	644	MACB	Drugs	Multi-drug_resistance	Multi-drug_ABC_efflux_pumps
525_bin.36_g__Streptococcus	AFABMGPM_01852	MEG_6651|Metals|Copper_resistance|Copper_resistance_protein|TCRA	95.143	350	17	0	1	350	173	522	0	673	358	811	TCRA	Metals	Copper_resistance	Copper_resistance_protein
525_bin.36_g__Streptococcus	AFABMGPM_01853	MEG_6651|Metals|Copper_resistance|Copper_resistance_protein|TCRA	97.021	235	7	0	1	235	551	785	3.42e-161	464	239	811	TCRA	Metals	Copper_resistance	Copper_resistance_protein
525_bin.36_g__Streptococcus	AFABMGPM_01854	MEG_6654|Metals|Copper_resistance|Copper_resistance_protein|TCRZ	98.507	67	1	0	1	67	1	67	7.22e-43	130	68	68	TCRZ	Metals	Copper_resistance	Copper_resistance_protein
525_bin.36_g__Streptococcus	AFABMGPM_01855	MEG_6652|Metals|Copper_resistance|Copper_resistance_protein|TCRB	93.488	215	4	1	1	215	1	205	2.04e-119	353	220	710	TCRB	Metals	Copper_resistance	Copper_resistance_protein
608_bin.12_g__Amaricoccus	JIIBHEHL_02770	MEG_6535|Biocides|Multi-biocide_resistance|Multi-biocide_ABC_efflux_pump|SMRA	80.734	109	21	0	1	109	501	609	1.02e-54	177	120	610	SMRA	Biocides	Multi-biocide_resistance	Multi-biocide_ABC_efflux_pump
608_bin.13_s__Lautropia_mirabilis	IPDIINBE_01012	MEG_8087|Biocides|Aldehyde_resistance|Aldehyde_degradation|FORMA	87.805	369	45	0	3	371	1	369	0	657	371	369	FORMA	Biocides	Aldehyde_resistance	Aldehyde_degradation
608_bin.1_g__Veillonella	FFCEAHAN_00491	MEG_3084|Biocides|Quaternary_Ammonium_Compounds_(QACs)_resistance|QAC-resistant_protein_UDP_glucose_4_epimerase|GALE	97.264	329	9	0	1	329	1	329	0	662	329	329	GALE	Biocides	Quaternary_Ammonium_Compounds_(QACs)_resistance	QAC-resistant_protein_UDP_glucose_4_epimerase
608_bin.23_s__Anaerococcus_nagyae	LCPBIOLD_00404	MEG_6652|Metals|Copper_resistance|Copper_resistance_protein|TCRB	81.994	622	112	0	1	622	89	710	0	1050	623	710	TCRB	Metals	Copper_resistance	Copper_resistance_protein
608_bin.28_g__Gemella*	BEMOELII_00914	MEG_1488|Metals|Multi-metal_resistance|Multi-metal_resistance_regulator|CADX	91.964	112	9	0	1	112	1	112	1.39e-73	212	112	112	CADX	Metals	Multi-metal_resistance	Multi-metal_resistance_regulator
608_bin.4_g__Paenibacillus	LNDMOCBC_02620	MEG_3593|Drugs|MLS|23S_rRNA_methyltransferases|LLMA	83.972	287	46	0	1	287	1	287	0	501	287	287	LLMA	Drugs	MLS	23S_rRNA_methyltransferases
608_bin.4_g__Paenibacillus	LNDMOCBC_04162	MEG_3881|Metals|Mercury_resistance|Mercury_resistance_regulator|MERR	98.519	135	2	0	1	135	1	135	2.36e-96	271	135	135	MERR	Metals	Mercury_resistance	Mercury_resistance_regulator
608_bin.4_g__Paenibacillus	LNDMOCBC_04165	MEG_3892|Metals|Mercury_resistance|Mercury_resistance_protein|MERT	96.396	111	0	1	1	107	18	128	2.78e-74	214	107	128	MERT	Metals	Mercury_resistance	Mercury_resistance_protein
608_bin.4_g__Paenibacillus	LNDMOCBC_04166	MEG_3841|Metals|Mercury_resistance|Mercury_resistance_protein|MERA	100	547	0	0	1	547	1	547	0	1114	547	547	MERA	Metals	Mercury_resistance	Mercury_resistance_protein
608_bin.4_g__Paenibacillus	LNDMOCBC_04167	MEG_3848|Metals|Mercury_resistance|Mercury_resistance_protein|MERB	97.685	216	5	0	1	216	1	216	4.7e-158	434	216	216	MERB	Metals	Mercury_resistance	Mercury_resistance_protein
706_bin.18_s__Lawsonella_clevelandensis_A	CJCLBBGH_01487	MEG_2654|Metals|Copper_resistance|Copper_resistance_protein|DNAK	82.274	598	98	3	1	593	1	595	0	988	619	625	DNAK	Metals	Copper_resistance	Copper_resistance_protein
706_bin.19_s__Corynebacterium_gottingense	JMKKMDJH_00404	MEG_7034|Drugs|Tetracyclines|Tetracycline_resistance_MFS_efflux_pumps|TETA	99.025	513	5	0	1	513	1	513	0	1009	513	513	TETA	Drugs	Tetracyclines	Tetracycline_resistance_MFS_efflux_pumps
706_bin.28_s__JAHHHE01_sp019359535*	KBLDEMCK_01211	MEG_1168|Biocides|Naphthoquinone|Naphthoquinone_resistance_protein|ARSHN	86.432	199	27	0	1	199	1	199	3.34e-131	365	203	206	ARSHN	Biocides	Naphthoquinone	Naphthoquinone_resistance_protein
706_bin.2_g__Moraxella_A	OEIOAOJI_00535	MEG_3837|Metals|Mercury_resistance|Mercury_resistance_protein|MERA	81.64	561	82	1	1	540	1	561	0	884	540	561	MERA	Metals	Mercury_resistance	Mercury_resistance_protein
706_bin.2_g__Moraxella_A	OEIOAOJI_00834	MEG_3293|Drugs|Lipopeptides|Colistin_phosphoethanolamine_transferase|ICR	97.964	442	9	0	1	442	117	558	0	910	442	558	ICR	Drugs	Lipopeptides	Colistin_phosphoethanolamine_transferase
706_bin.2_g__Moraxella_A	OEIOAOJI_00898	MEG_8087|Biocides|Aldehyde_resistance|Aldehyde_degradation|FORMA	84.282	369	58	0	17	385	1	369	0	639	385	369	FORMA	Biocides	Aldehyde_resistance	Aldehyde_degradation
706_bin.2_g__Moraxella_A	OEIOAOJI_00533	MEG_3886|Metals|Mercury_resistance|Mercury_resistance_regulator|MERR1	85.821	134	19	0	1	134	1	134	7.86e-84	239	135	144	MERR1	Metals	Mercury_resistance	Mercury_resistance_regulator
706_bin.2_g__Moraxella_A	OEIOAOJI_00533	MEG_3889|Metals|Mercury_resistance|Mercury_resistance_regulator|MERR2	85.821	134	19	0	1	134	1	134	1.45e-83	239	135	144	MERR2	Metals	Mercury_resistance	Mercury_resistance_regulator
706_bin.2_g__Moraxella_A	OEIOAOJI_00533	MEG_3880|Metals|Mercury_resistance|Mercury_resistance_regulator|MERR	85.926	135	19	0	1	135	1	135	1.45e-82	236	135	144	MERR	Metals	Mercury_resistance	Mercury_resistance_regulator
706_bin.7_g__Gemella*	LKHMLIIN_00221	MEG_1488|Metals|Multi-metal_resistance|Multi-metal_resistance_regulator|CADX	91.964	112	9	0	1	112	1	112	1.39e-73	212	112	112	CADX	Metals	Multi-metal_resistance	Multi-metal_resistance_regulator
706_bin.9_g__Staphylococcus	CNFOGOIG_00279	MEG_1060|Drugs|Aminoglycosides|Aminoglycoside_O-phosphotransferases|APH3-PRIME	85.932	263	37	0	1	263	4	266	7.02e-175	480	263	266	APH3-PRIME	Drugs	Aminoglycosides	Aminoglycoside_O-phosphotransferases
706_bin.9_g__Staphylococcus	CNFOGOIG_01864	MEG_5772|Biocides|Peroxide_resistance|peroxide_resistance_regulator|PERR	81.25	144	27	0	1	144	5	148	9.38e-93	263	146	148	PERR	Biocides	Peroxide_resistance	peroxide_resistance_regulator
706_bin.9_g__Staphylococcus	CNFOGOIG_01381	MEG_3943|Drugs|Multi-drug_resistance|MDR_regulator|MGRA	84.615	143	22	0	1	143	1	143	1.12e-88	253	146	147	MGRA	Drugs	Multi-drug_resistance	MDR_regulator
706_bin.9_g__Staphylococcus	CNFOGOIG_01476	MEG_2874|Biocides|Phenolic_compound_resistance|Phenolic_resistance_protein|FABI	85.156	256	38	0	1	256	1	256	3.49e-161	445	256	256	FABI	Biocides	Phenolic_compound_resistance	Phenolic_resistance_protein
817_bin.16_g__Anaerococcus	OPKFFPDE_00944	MEG_6652|Metals|Copper_resistance|Copper_resistance_protein|TCRB	83.099	568	96	0	1	568	143	710	0	969	568	710	TCRB	Metals	Copper_resistance	Copper_resistance_protein
817_bin.24_g__Pseudomonas_E	CLJEDNKM_00333	MEG_8741|Multi-compound|Drug_and_biocide_resistance|Drug_and_biocide_RND_efflux_regulator|YAJC	92.045	88	7	0	22	109	25	112	2.87e-56	168	109	112	YAJC	Multi-compound	Drug_and_biocide_resistance	Drug_and_biocide_RND_efflux_regulator
817_bin.24_g__Pseudomonas_E	CLJEDNKM_00513	MEG_8686|Multi-compound|Drug_and_biocide_resistance|Drug_and_biocide_RND_efflux_pumps|RSMA	95.082	61	3	0	1	61	1	61	3.01e-37	116	61	61	RSMA	Multi-compound	Drug_and_biocide_resistance	Drug_and_biocide_RND_efflux_pumps
817_bin.24_g__Pseudomonas_E	CLJEDNKM_01351	MEG_6546|Biocides|Peroxide_resistance|peroxide_resistance_protein|SODB	95.337	193	9	0	1	193	1	193	3.6e-140	386	193	193	SODB	Biocides	Peroxide_resistance	peroxide_resistance_protein
817_bin.24_g__Pseudomonas_E	CLJEDNKM_01404	MEG_6053|Metals|Multi-metal_resistance|Multi-metal_resistance_protein|RECGM	89.291	691	73	1	1	690	1	691	0	1211	690	691	RECGM	Metals	Multi-metal_resistance	Multi-metal_resistance_protein
817_bin.24_g__Pseudomonas_E	CLJEDNKM_02206	MEG_4059|Metals|Multi-metal_resistance|Multi-metal_resistance_protein|MREA	88.421	95	11	0	1	95	1	95	3.21e-58	171	95	95	MREA	Metals	Multi-metal_resistance	Multi-metal_resistance_protein
330_bin.14_g__Stenotrophomonas	HCFFIMCJ_03570	MEG_6529|Multi-compound|Drug_and_biocide_resistance|Drug_and_biocide_RND_efflux_pumps|SME	98.942	1040	11	0	1	1040	1	1040	0	2081	1040	1040	SME	Multi-compound	Drug_and_biocide_resistance	Drug_and_biocide_RND_efflux_pumps
817_bin.24_g__Pseudomonas_E	CLJEDNKM_02818	MEG_6153|Multi-compound|Biocide_and_metal_resistance|Biocide_and_metal_resistance_protein|RUVB	91.94	397	32	0	1	397	1	397	0	743	422	397	RUVB	Multi-compound	Biocide_and_metal_resistance	Biocide_and_metal_resistance_protein
817_bin.24_g__Pseudomonas_E	CLJEDNKM_03173	MEG_6154|Metals|Multi-metal_resistance|Multi-metal_resistance_protein|RUVBM	86.286	350	47	1	1	349	1	350	0	599	350	352	RUVBM	Metals	Multi-metal_resistance	Multi-metal_resistance_protein
817_bin.24_g__Pseudomonas_E	CLJEDNKM_03216	MEG_3917|Multi-compound|Drug_and_biocide_resistance|Drug_and_biocide_RND_efflux_pumps|MEXK	82.975	1022	174	0	1	1022	1	1022	0	1725	1024	1025	MEXK	Multi-compound	Drug_and_biocide_resistance	Drug_and_biocide_RND_efflux_pumps
817_bin.24_g__Pseudomonas_E	CLJEDNKM_03361	MEG_2022|Metals|Copper_resistance|Copper_resistance_protein|COPA	80.213	470	93	0	1	470	1	470	0	780	470	470	COPA	Metals	Copper_resistance	Copper_resistance_protein
817_bin.24_g__Pseudomonas_E	CLJEDNKM_03498	MEG_2117|Multi-compound|Drug_and_biocide_resistance|Drug_and_biocide_RND_efflux_regulator|CPXAR	80.444	225	44	0	1	225	1	225	1.01e-126	355	225	225	CPXAR	Multi-compound	Drug_and_biocide_resistance	Drug_and_biocide_RND_efflux_regulator
817_bin.27_g__Streptococcus	KMPBCHDE_00063	MEG_2876|Biocides|Phenolic_compound_resistance|Phenolic_resistance_protein|FABK	88.889	324	36	0	1	324	1	324	0	561	324	324	FABK	Biocides	Phenolic_compound_resistance	Phenolic_resistance_protein
330_bin.11_s__Staphylococcus_hominis	OADHDGDI_00988	MEG_7090|Drugs|Tetracyclines|Tetracycline_resistance_MFS_efflux_pumps|TETK	99.782	459	1	0	1	459	1	459	0	890	459	459	TETK	Drugs	Tetracyclines	Tetracycline_resistance_MFS_efflux_pumps
817_bin.33_g__Granulicatella	HBBKFOCN_00997	MEG_7054|Drugs|Tetracyclines|Tetracycline_resistance_ABC_efflux_pumps|TETB60	82.383	579	102	0	1	579	1	579	0	986	579	579	TETB60	Drugs	Tetracyclines	Tetracycline_resistance_ABC_efflux_pumps
817_bin.38_s__Anaerococcus_octavius	BKJBPMMN_00115	MEG_6652|Metals|Copper_resistance|Copper_resistance_protein|TCRB	84.972	539	81	0	1	539	172	710	0	935	539	710	TCRB	Metals	Copper_resistance	Copper_resistance_protein
817_bin.38_s__Anaerococcus_octavius	BKJBPMMN_01275	MEG_6653|Metals|Copper_resistance|Copper_resistance_protein|TCRY	82.781	151	26	0	1	151	1	151	3.69e-91	259	151	151	TCRY	Metals	Copper_resistance	Copper_resistance_protein
817_bin.45_s__Lautropia_mirabilis	GOCOJHID_00106	MEG_8087|Biocides|Aldehyde_resistance|Aldehyde_degradation|FORMA	87.288	118	15	0	1	118	252	369	1.24e-73	221	118	369	FORMA	Biocides	Aldehyde_resistance	Aldehyde_degradation
817_bin.46_g__Anoxybacillus	KHMDFPHA_01500	MEG_3075|Metals|Aluminum_resistance|Aluminum_ATPase_|G2ALT	96.38	221	8	0	1	221	1	221	1.54e-163	448	221	221	G2ALT	Metals	Aluminum_resistance	Aluminum_ATPase_
817_bin.46_g__Anoxybacillus	KHMDFPHA_00806	MEG_1159|Metals|Arsenic_resistance|Arsenic_resistance_protein|ARSC	92.857	28	2	0	3	30	4	31	1.51e-15	62	30	139	ARSC	Metals	Arsenic_resistance	Arsenic_resistance_protein
817_bin.50_s__Acinetobacter_junii	OKICCNEC_00011	MEG_4217|Metals|Multi-metal_resistance|Multi-metal_resistance_protein|NREB	88.136	413	49	0	4	416	3	415	0	749	417	416	NREB	Metals	Multi-metal_resistance	Multi-metal_resistance_protein
817_bin.50_s__Acinetobacter_junii	OKICCNEC_00399	MEG_4044|Drugs|MLS|Macrolide_phosphotransferases|MPHE	100	294	0	0	1	294	1	294	0	600	294	294	MPHE	Drugs	MLS	Macrolide_phosphotransferases
817_bin.50_s__Acinetobacter_junii	OKICCNEC_00400	MEG_4075|Drugs|MLS|MLS_resistance_ABC_efflux_pumps|MSRE	100	491	0	0	1	491	1	491	0	1000	491	491	MSRE	Drugs	MLS	MLS_resistance_ABC_efflux_pumps
817_bin.50_s__Acinetobacter_junii	OKICCNEC_00615	MEG_373|Multi-compound|Drug_and_biocide_resistance|Drug_and_biocide_MATE_efflux_pumps|ABEM	80.942	446	85	0	3	448	3	448	0	716	449	448	ABEM	Multi-compound	Drug_and_biocide_resistance	Drug_and_biocide_MATE_efflux_pumps
817_bin.50_s__Acinetobacter_junii	OKICCNEC_00879	MEG_3934|Multi-compound|Drug_and_biocide_resistance|Drug_and_biocide_RND_efflux_regulator|MEXT	98.48	329	5	0	1	329	1	329	0	669	329	329	MEXT	Multi-compound	Drug_and_biocide_resistance	Drug_and_biocide_RND_efflux_regulator
525_bin.10_s__Corynebacterium_glucuronolyticum	ICBHJEDO_00557	MEG_7228|Drugs|Tetracyclines|Tetracycline_resistance_ribosomal_protection_proteins|TETW	94.828	638	33	0	1	638	1	638	0	1246	639	639	TETW	Drugs	Tetracyclines	Tetracycline_resistance_ribosomal_protection_proteins
817_bin.50_s__Acinetobacter_junii	OKICCNEC_01542	MEG_698|Multi-compound|Drug_and_biocide_resistance|Drug_and_biocide_RND_efflux_pumps|ADEK	85.031	481	71	1	1	481	1	480	0	805	486	484	ADEK	Multi-compound	Drug_and_biocide_resistance	Drug_and_biocide_RND_efflux_pumps
817_bin.52_f__Weeksellaceae	BDGFEMBL_01567	MEG_8661|Drugs|Aminoglycosides|Aminoglycoside_efflux_pumps|RANB	81.046	153	29	0	1	153	101	253	5.07e-88	255	153	253	RANB	Drugs	Aminoglycosides	Aminoglycoside_efflux_pumps
817_bin.57_g__Neisseria	ODBBGNFE_00744	MEG_3658|Drugs|Multi-drug_resistance|Multi-drug_ABC_efflux_pumps|MACB	88.217	645	75	1	1	645	1	644	0	1174	645	644	MACB	Drugs	Multi-drug_resistance	Multi-drug_ABC_efflux_pumps
817_bin.57_g__Neisseria	ODBBGNFE_01045	MEG_2887|Multi-compound|Drug_and_biocide_resistance|Drug_and_biocide_MFS_efflux_regulator|FARR	89.583	144	15	0	1	144	1	144	3.94e-86	246	145	146	FARR	Multi-compound	Drug_and_biocide_resistance	Drug_and_biocide_MFS_efflux_regulator
817_bin.57_g__Neisseria	ODBBGNFE_01257	MEG_4213|Drugs|Multi-drug_resistance|Multi-drug_MATE_efflux_pump|NORMD	85.839	459	65	0	1	459	1	459	0	795	459	459	NORMD	Drugs	Multi-drug_resistance	Multi-drug_MATE_efflux_pump
817_bin.6_g__Veillonella	IKOOMLIN_01217	MEG_3084|Biocides|Quaternary_Ammonium_Compounds_(QACs)_resistance|QAC-resistant_protein_UDP_glucose_4_epimerase|GALE	95.745	329	14	0	1	329	1	329	0	652	329	329	GALE	Biocides	Quaternary_Ammonium_Compounds_(QACs)_resistance	QAC-resistant_protein_UDP_glucose_4_epimerase
817_bin.70_g__Stutzerimonas	JPPDIPKF_00253	MEG_3869|Metals|Mercury_resistance|Mercury_resistance_protein|MERF	96.296	81	3	0	1	81	1	81	1.19e-52	156	81	81	MERF	Metals	Mercury_resistance	Mercury_resistance_protein
817_bin.70_g__Stutzerimonas	JPPDIPKF_00255	MEG_3897|Metals|Mercury_resistance|Mercury_resistance_protein|MERT	85.345	116	17	0	1	116	1	116	2.66e-69	201	116	116	MERT	Metals	Mercury_resistance	Mercury_resistance_protein
817_bin.70_g__Stutzerimonas	JPPDIPKF_00534	MEG_8741|Multi-compound|Drug_and_biocide_resistance|Drug_and_biocide_RND_efflux_regulator|YAJC	94.318	88	5	0	22	109	25	112	4.7e-57	170	109	112	YAJC	Multi-compound	Drug_and_biocide_resistance	Drug_and_biocide_RND_efflux_regulator
817_bin.70_g__Stutzerimonas	JPPDIPKF_00591	MEG_6153|Multi-compound|Biocide_and_metal_resistance|Biocide_and_metal_resistance_protein|RUVB	91.688	397	33	0	1	397	1	397	0	739	422	397	RUVB	Multi-compound	Biocide_and_metal_resistance	Biocide_and_metal_resistance_protein
817_bin.70_g__Stutzerimonas	JPPDIPKF_00829	MEG_6546|Biocides|Peroxide_resistance|peroxide_resistance_protein|SODB	88.021	192	23	0	1	192	1	192	1.55e-131	365	193	193	SODB	Biocides	Peroxide_resistance	peroxide_resistance_protein
817_bin.70_g__Stutzerimonas	JPPDIPKF_02431	MEG_1706|Metals|Chromium_resistance|Chromium_resistance_protein|CHRA	84.536	388	57	1	1	385	71	458	0	628	385	458	CHRA	Metals	Chromium_resistance	Chromium_resistance_protein
817_bin.70_g__Stutzerimonas	JPPDIPKF_02433	MEG_1703|Multi-compound|Biocide_and_metal_resistance|Biocide_and_metal_resistance_protein|CHR	80.405	148	29	0	1	148	1	148	5.22e-89	254	149	150	CHR	Multi-compound	Biocide_and_metal_resistance	Biocide_and_metal_resistance_protein
817_bin.70_g__Stutzerimonas	JPPDIPKF_02505	MEG_3936|Biocides|Multi-biocide_resistance|Multi-biocide_RND_efflux_pump|MEXW	81.863	1009	183	0	1	1009	1	1009	0	1676	1018	1018	MEXW	Biocides	Multi-biocide_resistance	Multi-biocide_RND_efflux_pump
817_bin.70_g__Stutzerimonas	JPPDIPKF_02866	MEG_3873|Metals|Mercury_resistance|Mercury_resistance_protein|MERP	92.308	91	7	0	1	91	1	91	2.68e-47	144	91	91	MERP	Metals	Mercury_resistance	Mercury_resistance_protein
817_bin.70_g__Stutzerimonas	JPPDIPKF_02867	MEG_3870|Metals|Mercury_resistance|Mercury_resistance_protein|MERF	100	81	0	0	1	81	1	81	7.45e-54	159	81	81	MERF	Metals	Mercury_resistance	Mercury_resistance_protein
817_bin.70_g__Stutzerimonas	JPPDIPKF_02868	MEG_3842|Metals|Mercury_resistance|Mercury_resistance_protein|MERA	85.205	561	70	2	1	548	1	561	0	922	548	561	MERA	Metals	Mercury_resistance	Mercury_resistance_protein
817_bin.70_g__Stutzerimonas	JPPDIPKF_02869	MEG_3861|Metals|Mercury_resistance|Mercury_resistance_regulator|MERD	98.347	121	2	0	1	121	1	121	7.47e-82	233	121	121	MERD	Metals	Mercury_resistance	Mercury_resistance_regulator
817_bin.70_g__Stutzerimonas	JPPDIPKF_02870	MEG_3868|Metals|Mercury_resistance|Mercury_resistance_protein|MERE	100	78	0	0	1	78	1	78	2.8e-53	157	78	78	MERE	Metals	Mercury_resistance	Mercury_resistance_protein
817_bin.70_g__Stutzerimonas	JPPDIPKF_03248	MEG_6154|Metals|Multi-metal_resistance|Multi-metal_resistance_protein|RUVBM	100	352	0	0	1	352	1	352	0	697	352	352	RUVBM	Metals	Multi-metal_resistance	Multi-metal_resistance_protein
817_bin.70_g__Stutzerimonas	JPPDIPKF_03295	MEG_2058|Metals|Copper_resistance|Copper_resistance_protein|COPG	98.758	161	2	0	1	161	1	161	1.39e-116	324	161	161	COPG	Metals	Copper_resistance	Copper_resistance_protein
817_bin.70_g__Stutzerimonas	JPPDIPKF_03296	MEG_2038|Metals|Copper_resistance|Copper_resistance_protein|COPB	99.387	326	2	0	1	326	1	326	0	655	326	326	COPB	Metals	Copper_resistance	Copper_resistance_protein
817_bin.70_g__Stutzerimonas	JPPDIPKF_03297	MEG_2023|Metals|Copper_resistance|Copper_resistance_protein|COPA	96.19	630	13	1	1	630	1	619	0	1236	630	619	COPA	Metals	Copper_resistance	Copper_resistance_protein
817_bin.70_g__Stutzerimonas	JPPDIPKF_03298	MEG_2071|Metals|Copper_resistance|Copper_resistance_regulator|COPR	96.957	230	7	0	1	230	1	230	5.96e-160	439	230	230	COPR	Metals	Copper_resistance	Copper_resistance_regulator
817_bin.70_g__Stutzerimonas	JPPDIPKF_03623	MEG_6154|Metals|Multi-metal_resistance|Multi-metal_resistance_protein|RUVBM	88.728	346	38	1	1	345	1	346	0	609	350	352	RUVBM	Metals	Multi-metal_resistance	Multi-metal_resistance_protein
817_bin.70_g__Stutzerimonas	JPPDIPKF_04113	MEG_2073|Metals|Copper_resistance|Copper_resistance_regulator|COPR	80	160	32	0	2	161	66	225	6.55e-92	264	161	227	COPR	Metals	Copper_resistance	Copper_resistance_regulator
817_bin.70_g__Stutzerimonas	JPPDIPKF_04493	MEG_2073|Metals|Copper_resistance|Copper_resistance_regulator|COPR	80.889	225	43	0	1	225	1	225	2.7e-130	364	227	227	COPR	Metals	Copper_resistance	Copper_resistance_regulator
817_bin.70_g__Stutzerimonas	JPPDIPKF_04618	MEG_2074|Metals|Copper_resistance|Copper_resistance_regulator|COPR	86.667	45	6	0	1	45	182	226	3.86e-23	84.3	46	231	COPR	Metals	Copper_resistance	Copper_resistance_regulator
817_bin.70_g__Stutzerimonas	JPPDIPKF_04618	MEG_5424|Metals|Copper_resistance|Copper_resistance_regulator|PCOR	80.488	41	8	0	1	41	182	222	9.49e-19	72.8	46	226	PCOR	Metals	Copper_resistance	Copper_resistance_regulator
817_bin.70_g__Stutzerimonas	JPPDIPKF_04761	MEG_3897|Metals|Mercury_resistance|Mercury_resistance_protein|MERT	94.828	116	6	0	1	116	1	116	2.97e-75	216	116	116	MERT	Metals	Mercury_resistance	Mercury_resistance_protein
817_bin.70_g__Stutzerimonas	JPPDIPKF_04762	MEG_3873|Metals|Mercury_resistance|Mercury_resistance_protein|MERP	82.418	91	16	0	1	91	1	91	1.08e-43	134	91	91	MERP	Metals	Mercury_resistance	Mercury_resistance_protein

## Sheet: HGT-ARG
source	target	interaction
316_bin.1_g__Promicromonospora	VANRO	None
316_bin.1_g__Promicromonospora	VANRS	None
316_bin.6_g__Pseudomonas_E	OSCA	None
316_bin.6_g__Pseudomonas_E	CUEA	None
316_bin.6_g__Pseudomonas_E	MEXF	Plasmid
316_bin.6_g__Pseudomonas_E	MEXE	Plasmid
316_bin.6_g__Pseudomonas_E	CPXAR	None
316_bin.6_g__Pseudomonas_E	COPR	None
316_bin.6_g__Pseudomonas_E	COPS	None
316_bin.6_g__Pseudomonas_E	COPC	None
316_bin.6_g__Pseudomonas_E	COPD	None
316_bin.6_g__Pseudomonas_E	YAJC	None
316_bin.6_g__Pseudomonas_E	RUVBM	None
316_bin.6_g__Pseudomonas_E	RSMA	None
316_bin.6_g__Pseudomonas_E	RUVB	None
316_bin.6_g__Pseudomonas_E	MEXK	None
316_bin.6_g__Pseudomonas_E	EMHR	None
316_bin.6_g__Pseudomonas_E	EMHA	None
316_bin.6_g__Pseudomonas_E	TTGA	None
316_bin.6_g__Pseudomonas_E	EMHB	None
316_bin.6_g__Pseudomonas_E	TTGB	None
316_bin.6_g__Pseudomonas_E	MEXB	None
316_bin.6_g__Pseudomonas_E	EMHC	None
316_bin.6_g__Pseudomonas_E	RECGM	None
316_bin.6_g__Pseudomonas_E	MEXW	None
316_bin.6_g__Pseudomonas_E	SODB	None
323_bin.22_g__Exiguobacterium	CADC	None
323_bin.22_g__Exiguobacterium	MPH	Plasmid
323_bin.30_f__Chroococcidiopsidaceae	ARSHN	Plasmid
323_bin.32_f__Coleofasciculaceae	CORT	None
323_bin.39_s__Parageobacillus_toebii	G2ALT	None
323_bin.39_s__Parageobacillus_toebii	MERA	None
323_bin.57_o__Coriobacteriales	TCRY	None
323_bin.60_g__Veillonella	GALE	None
330_bin.11_s__Staphylococcus_hominis	MECA	None
330_bin.11_s__Staphylococcus_hominis	ARSC	None
330_bin.11_s__Staphylococcus_hominis	MGRA	None
330_bin.11_s__Staphylococcus_hominis	PERR	None
330_bin.11_s__Staphylococcus_hominis	CADD	Plasmid
330_bin.11_s__Staphylococcus_hominis	APH3-PRIME	Phage
330_bin.11_s__Staphylococcus_hominis	BLAZ	None
330_bin.11_s__Staphylococcus_hominis	TETK	Plasmid
330_bin.11_s__Staphylococcus_hominis	ARLR	Prophage
330_bin.11_s__Staphylococcus_hominis	RLMH	None
330_bin.11_s__Staphylococcus_hominis	MECI	None
330_bin.11_s__Staphylococcus_hominis	QACAB	Plasmid/Phage
330_bin.11_s__Staphylococcus_hominis	QACR	Plasmid/Phage
330_bin.11_s__Staphylococcus_hominis	FABI	None
330_bin.11_s__Staphylococcus_hominis	ARSBM	None
330_bin.13_s__Scardovia_wiggsiae	RPOB	None
330_bin.14_g__Stenotrophomonas	SMRA	None
330_bin.14_g__Stenotrophomonas	APH3-DPRIME	None
330_bin.14_g__Stenotrophomonas	L1	None
330_bin.14_g__Stenotrophomonas	SMET	None
330_bin.14_g__Stenotrophomonas	FORMA	None
330_bin.14_g__Stenotrophomonas	PCM	None
330_bin.14_g__Stenotrophomonas	TOLCSM	None
330_bin.14_g__Stenotrophomonas	EMRBSM	None
330_bin.14_g__Stenotrophomonas	EMRASM	None
330_bin.14_g__Stenotrophomonas	EMRCSM	None
330_bin.14_g__Stenotrophomonas	EMRRSM	None
330_bin.14_g__Stenotrophomonas	GOLT	Plasmid
330_bin.14_g__Stenotrophomonas	APH3-PRIME	None
330_bin.14_g__Stenotrophomonas	SME	None
330_bin.15_g__Pseudomonas	OPRJ	None
330_bin.15_g__Pseudomonas	MEXC	None
330_bin.15_g__Pseudomonas	MEXD	None
330_bin.15_g__Pseudomonas	APH3-DPRIME	None
330_bin.15_g__Pseudomonas	APH3-PRIME	None
330_bin.15_g__Pseudomonas	OXA	None
330_bin.15_g__Pseudomonas	PARS	Phage
330_bin.15_g__Pseudomonas	PARR	Phage
330_bin.15_g__Pseudomonas	YAJC	None
330_bin.15_g__Pseudomonas	MEXY	None
330_bin.15_g__Pseudomonas	MEXX	None
330_bin.15_g__Pseudomonas	CINA	None
330_bin.15_g__Pseudomonas	CZRA	None
330_bin.15_g__Pseudomonas	CZRB	None
330_bin.15_g__Pseudomonas	OPMB	None
330_bin.15_g__Pseudomonas	MUXC	None
330_bin.15_g__Pseudomonas	MUXB	None
330_bin.15_g__Pseudomonas	PMPM	None
330_bin.15_g__Pseudomonas	FPTA	None
330_bin.15_g__Pseudomonas	PDC	None
330_bin.15_g__Pseudomonas	OSCA	None
330_bin.15_g__Pseudomonas	RSMA	None
330_bin.15_g__Pseudomonas	BASRS	None
330_bin.15_g__Pseudomonas	EMRE	None
330_bin.15_g__Pseudomonas	MUXA	None
330_bin.15_g__Pseudomonas	SOXR	None
330_bin.15_g__Pseudomonas	RUVBM	None
330_bin.15_g__Pseudomonas	FOSA	None
330_bin.15_g__Pseudomonas	CPXAR	None
330_bin.15_g__Pseudomonas	YJCG	None
330_bin.15_g__Pseudomonas	BCR1	None
330_bin.15_g__Pseudomonas	MEXF	Plasmid
330_bin.15_g__Pseudomonas	OPRN	Plasmid
330_bin.15_g__Pseudomonas	OPMD	None
330_bin.15_g__Pseudomonas	MEXI	None
330_bin.15_g__Pseudomonas	MEXH	None
330_bin.15_g__Pseudomonas	MEXG	None
330_bin.15_g__Pseudomonas	MEXN	None
330_bin.15_g__Pseudomonas	MEXQ	None
330_bin.15_g__Pseudomonas	TRIC	Plasmid
330_bin.15_g__Pseudomonas	TRIB	Plasmid
330_bin.15_g__Pseudomonas	TRIA	Plasmid
330_bin.15_g__Pseudomonas	YGIW	None
330_bin.15_g__Pseudomonas	MEXE	Plasmid
330_bin.15_g__Pseudomonas	RUVB	None
330_bin.15_g__Pseudomonas	MEXW	None
330_bin.15_g__Pseudomonas	MEXV	None
330_bin.15_g__Pseudomonas	SODB	None
330_bin.15_g__Pseudomonas	OPMH	None
330_bin.15_g__Pseudomonas	ARNA	None
330_bin.15_g__Pseudomonas	CPRR	None
330_bin.15_g__Pseudomonas	CPRS	None
330_bin.15_g__Pseudomonas	MEXR	None
330_bin.15_g__Pseudomonas	MEXA	None
330_bin.15_g__Pseudomonas	MEXB	None
330_bin.15_g__Pseudomonas	OPRM	None
330_bin.15_g__Pseudomonas	MEXK	None
330_bin.15_g__Pseudomonas	MEXJ	None
330_bin.15_g__Pseudomonas	MEXL	None
330_bin.15_g__Pseudomonas	RECGM	None
330_bin.15_g__Pseudomonas	CAT	None
330_bin.15_g__Pseudomonas	SODA	None
330_bin.19_o__Cyanobacteriales	ARSHN	Plasmid
330_bin.7_g__Acinetobacter	ADEB	None
330_bin.7_g__Acinetobacter	ADEA	None
330_bin.7_g__Acinetobacter	ADER	None
330_bin.7_g__Acinetobacter	NREB	None
330_bin.7_g__Acinetobacter	ADEJ	None
330_bin.7_g__Acinetobacter	ADEK	None
330_bin.7_g__Acinetobacter	OXA	None
330_bin.7_g__Acinetobacter	ABEM	None
330_bin.7_g__Acinetobacter	MEXT	None
330_bin.7_g__Acinetobacter	ANT3-DPRIME	None
330_bin.9_g__Ochrobactrum	MPRF	Plasmid
330_bin.9_g__Ochrobactrum	SMRA	None
330_bin.9_g__Ochrobactrum	BEPD	None
330_bin.9_g__Ochrobactrum	OCH	None
330_bin.9_g__Ochrobactrum	BEPE	None
330_bin.9_g__Ochrobactrum	CML	None
330_bin.9_g__Ochrobactrum	SILP	None
330_bin.9_g__Ochrobactrum	ACTPC	None
330_bin.9_g__Ochrobactrum	FORMA	Plasmid
330_bin.9_g__Ochrobactrum	BEPC	None
406_bin.15_s__Staphylococcus_epidermidis	APH3-PRIME	None
406_bin.15_s__Staphylococcus_epidermidis	FABI	None
406_bin.15_s__Staphylococcus_epidermidis	PERR	None
406_bin.15_s__Staphylococcus_epidermidis	NORA	None
406_bin.15_s__Staphylococcus_epidermidis	MGRA	None
406_bin.15_s__Staphylococcus_epidermidis	FOSA	Phage
406_bin.15_s__Staphylococcus_epidermidis	FOSB	Phage
406_bin.15_s__Staphylococcus_epidermidis	CADD	None
406_bin.15_s__Staphylococcus_epidermidis	ARSBM	Phage
406_bin.15_s__Staphylococcus_epidermidis	ARSC	Phage
406_bin.15_s__Staphylococcus_epidermidis	ARLR	None
406_bin.17_g__Lachnoanaerobaculum	LSAC	None
406_bin.2_g__Prevotella	LNUC	None
406_bin.2_g__Prevotella	CFX	None
406_bin.31_s__Neisseria_elongata	MACA	None
406_bin.31_s__Neisseria_elongata	SULII	None
406_bin.31_s__Neisseria_elongata	SULI	None
406_bin.3_g__Pseudomonas_E	MEXW	None
406_bin.3_g__Pseudomonas_E	EMHC	None
406_bin.3_g__Pseudomonas_E	EMHA	None
406_bin.3_g__Pseudomonas_E	TTGA	None
406_bin.3_g__Pseudomonas_E	CUEA	None
406_bin.3_g__Pseudomonas_E	CPXAR	None
406_bin.3_g__Pseudomonas_E	MEXF	None
406_bin.3_g__Pseudomonas_E	MEXK	None
406_bin.3_g__Pseudomonas_E	RUVBM	None
406_bin.3_g__Pseudomonas_E	EMHB	None
406_bin.3_g__Pseudomonas_E	TTGB	None
406_bin.3_g__Pseudomonas_E	RECGM	None
406_bin.3_g__Pseudomonas_E	EMHR	None
406_bin.3_g__Pseudomonas_E	RUVB	None
406_bin.3_g__Pseudomonas_E	YAJC	None
406_bin.3_g__Pseudomonas_E	MEXE	None
406_bin.4_g__Granulicatella	CADC	None
406_bin.4_g__Granulicatella	TETB60	None
406_bin.4_g__Granulicatella	TETA60	None
406_bin.8_s__Gemella_sanguinis	QACAB	Plasmid/Phage
406_bin.8_s__Gemella_sanguinis	QACR	Plasmid/Phage
406_bin.8_s__Gemella_sanguinis	ERMC	Plasmid
406_bin.8_s__Gemella_sanguinis	MPHC	None
406_bin.9_g__Gemella	CADX	None
413_bin.16_g__Moraxella_A	FORMA	None
413_bin.16_g__Moraxella_A	ICR	None
413_bin.18_g__Kaistella	RANB	None
427_bin.30_s__Comamonas_denitrificans_A	FORMA	None
427_bin.30_s__Comamonas_denitrificans_A	PSTB	None
427_bin.3_s__Xanthomonas_campestris	GESB	Plasmid
427_bin.3_s__Xanthomonas_campestris	SMRA	None
427_bin.3_s__Xanthomonas_campestris	FORMA	None
427_bin.3_s__Xanthomonas_campestris	EMRBSM	None
427_bin.4_g__Pseudomonas_E	COPA	Plasmid
427_bin.4_g__Pseudomonas_E	CZCP	Plasmid
427_bin.4_g__Pseudomonas_E	RUVBM	None
427_bin.4_g__Pseudomonas_E	PSTB	None
427_bin.4_g__Pseudomonas_E	TOPR	None
427_bin.4_g__Pseudomonas_E	MEXD1	None
427_bin.4_g__Pseudomonas_E	MEXD	None
427_bin.4_g__Pseudomonas_E	OPRN	None
427_bin.4_g__Pseudomonas_E	CPXAR	None
427_bin.4_g__Pseudomonas_E	MREA	Plasmid
427_bin.4_g__Pseudomonas_E	YAJC	None
427_bin.4_g__Pseudomonas_E	MEXC1	None
427_bin.6_g__Microcoleus	ARSHN	None
427_bin.9_g__Neisseria	MTRE	None
427_bin.9_g__Neisseria	MTRD	None
427_bin.9_g__Neisseria	FORMA	None
427_bin.9_g__Neisseria	NORMD	None
427_bin.9_g__Neisseria	MSRD	None
427_bin.9_g__Neisseria	FARR	None
511_bin.30_s__Corynebacterium_durum	DNAK	None
511_bin.33_s__Staphylococcus_capitis	BLAR	None
511_bin.33_s__Staphylococcus_capitis	BLAI	Phage
511_bin.33_s__Staphylococcus_capitis	ARSC	None
511_bin.33_s__Staphylococcus_capitis	MGRA	Phage
511_bin.33_s__Staphylococcus_capitis	APH3-PRIME	None
511_bin.33_s__Staphylococcus_capitis	ARSBM	None
511_bin.33_s__Staphylococcus_capitis	NORA	None
511_bin.33_s__Staphylococcus_capitis	PERR	None
511_bin.33_s__Staphylococcus_capitis	ARLR	Phage
511_bin.33_s__Staphylococcus_capitis	RLMH	Phage
511_bin.33_s__Staphylococcus_capitis	FABI	None
511_bin.52_s__Lautropia_mirabilis	FORMA	None
511_bin.54_g__Aggregatibacter	FBPA	None
511_bin.65_s__Mesocricetibacter_sp905373425	FBPA	None
511_bin.65_s__Mesocricetibacter_sp905373425	FBPB	None
511_bin.65_s__Mesocricetibacter_sp905373425	CRP	None
511_bin.6_s__Staphylococcus_epidermidis	FOSA	None
511_bin.6_s__Staphylococcus_epidermidis	FOSB	None
511_bin.6_s__Staphylococcus_epidermidis	APH3-PRIME	None
511_bin.6_s__Staphylococcus_epidermidis	MGRA	None
511_bin.6_s__Staphylococcus_epidermidis	ARLR	None
511_bin.6_s__Staphylococcus_epidermidis	ARSC	None
511_bin.6_s__Staphylococcus_epidermidis	FABI	None
511_bin.6_s__Staphylococcus_epidermidis	NORA	None
525_bin.10_s__Corynebacterium_glucuronolyticum	TETW	None
525_bin.10_s__Corynebacterium_glucuronolyticum	TETO	None
525_bin.12_g__Anaerococcus	TCRB	None
525_bin.20_g__Neisseria	FARR	None
525_bin.20_g__Neisseria	NORMD	None
525_bin.20_g__Neisseria	CADD	None
525_bin.20_g__Neisseria	MACA	None
525_bin.20_g__Neisseria	MACB	Plasmid
525_bin.20_g__Neisseria	FARB	None
525_bin.20_g__Neisseria	MTRC	None
525_bin.20_g__Neisseria	MTRD	None
525_bin.20_g__Neisseria	MTRE	None
525_bin.20_g__Neisseria	FORMA	None
525_bin.36_g__Streptococcus	TCRA	Plasmid
525_bin.36_g__Streptococcus	TCRZ	Plasmid
525_bin.36_g__Streptococcus	TCRB	Plasmid
608_bin.12_g__Amaricoccus	SMRA	None
608_bin.13_s__Lautropia_mirabilis	FORMA	None
608_bin.1_g__Veillonella	GALE	None
608_bin.23_s__Anaerococcus_nagyae	TCRB	None
608_bin.28_g__Gemella*	CADX	None
608_bin.4_g__Paenibacillus	LLMA	None
608_bin.4_g__Paenibacillus	MERR	Plasmid
608_bin.4_g__Paenibacillus	MERT	Plasmid
608_bin.4_g__Paenibacillus	MERA	Plasmid
608_bin.4_g__Paenibacillus	MERB	Plasmid
706_bin.18_s__Lawsonella_clevelandensis_A	DNAK	None
706_bin.19_s__Corynebacterium_gottingense	TETA	None
706_bin.28_s__JAHHHE01_sp019359535*	ARSHN	None
706_bin.2_g__Moraxella_A	MERA	Plasmid
706_bin.2_g__Moraxella_A	ICR	None
706_bin.2_g__Moraxella_A	FORMA	None
706_bin.2_g__Moraxella_A	MERR1	Plasmid
706_bin.2_g__Moraxella_A	MERR2	Plasmid
706_bin.2_g__Moraxella_A	MERR	Plasmid
706_bin.7_g__Gemella*	CADX	None
706_bin.9_g__Staphylococcus	APH3-PRIME	None
706_bin.9_g__Staphylococcus	PERR	None
706_bin.9_g__Staphylococcus	MGRA	None
706_bin.9_g__Staphylococcus	FABI	None
817_bin.16_g__Anaerococcus	TCRB	None
817_bin.24_g__Pseudomonas_E	YAJC	None
817_bin.24_g__Pseudomonas_E	RSMA	None
817_bin.24_g__Pseudomonas_E	SODB	None
817_bin.24_g__Pseudomonas_E	RECGM	None
817_bin.24_g__Pseudomonas_E	MREA	Plasmid
817_bin.24_g__Pseudomonas_E	MEXF	None
817_bin.24_g__Pseudomonas_E	RUVB	None
817_bin.24_g__Pseudomonas_E	RUVBM	None
817_bin.24_g__Pseudomonas_E	MEXK	None
817_bin.24_g__Pseudomonas_E	COPA	Plasmid
817_bin.24_g__Pseudomonas_E	CPXAR	None
817_bin.27_g__Streptococcus	FABK	None
817_bin.2_g__Porphyromonas_A	CFX	None
817_bin.33_g__Granulicatella	TETB60	None
817_bin.38_s__Anaerococcus_octavius	TCRB	None
817_bin.38_s__Anaerococcus_octavius	TCRY	None
817_bin.45_s__Lautropia_mirabilis	FORMA	None
817_bin.46_g__Anoxybacillus	G2ALT	None
817_bin.46_g__Anoxybacillus	ARSC	None
817_bin.50_s__Acinetobacter_junii	NREB	None
817_bin.50_s__Acinetobacter_junii	MPHE	Phage
817_bin.50_s__Acinetobacter_junii	MSRE	Phage
817_bin.50_s__Acinetobacter_junii	ABEM	None
817_bin.50_s__Acinetobacter_junii	MEXT	None
817_bin.50_s__Acinetobacter_junii	ADEJ	Plasmid
817_bin.50_s__Acinetobacter_junii	ADEK	Plasmid
817_bin.52_f__Weeksellaceae	RANB	None
817_bin.57_g__Neisseria	MACB	None
817_bin.57_g__Neisseria	FARR	None
817_bin.57_g__Neisseria	NORMD	None
817_bin.6_g__Veillonella	GALE	None
817_bin.70_g__Stutzerimonas	MERF	Plasmid
817_bin.70_g__Stutzerimonas	MERT	Plasmid
817_bin.70_g__Stutzerimonas	YAJC	None
817_bin.70_g__Stutzerimonas	RUVB	None
817_bin.70_g__Stutzerimonas	SODB	None
817_bin.70_g__Stutzerimonas	CHRA	Plasmid
817_bin.70_g__Stutzerimonas	CHR	Plasmid
817_bin.70_g__Stutzerimonas	MEXW	None
817_bin.70_g__Stutzerimonas	MERP	Plasmid
817_bin.70_g__Stutzerimonas	MERA	Plasmid
817_bin.70_g__Stutzerimonas	MERD	Plasmid
817_bin.70_g__Stutzerimonas	MERE	Plasmid
817_bin.70_g__Stutzerimonas	RUVBM	None
817_bin.70_g__Stutzerimonas	COPG	Plasmid
817_bin.70_g__Stutzerimonas	COPB	Plasmid
817_bin.70_g__Stutzerimonas	COPA	Plasmid
817_bin.70_g__Stutzerimonas	COPR	Plasmid
817_bin.70_g__Stutzerimonas	PCOR	None
